# Supplementary material for: Examination of factors affecting insomnia in older victims of the Kumamoto earthquake
Source: PeerJ. 2026 Jan 13;14:e20584. doi: 10.7717/peerj.20584 (PMC12810385; doi:10.7717/peerj.20584)
Supplement: Supplemental Information 1 [file peerj-14-20584-s001.xlsx]

## Sheet: Sheet1
No.	Gender	Age	Cohabitant	temporary housing	current residence	Scope of relocation	exercise habits	Eat three meals a day	Appetite	Meal partner	Community participation	SS (anyone)	SS (Family)	SS (Friend)	SS (Neighbors)	SS (Coworker)	SS (District welfare commissioners)	SS (Hospital)	SS (Nursing care office )	SS (City office)	SS (Other)	AIS-1	AIS-2	AIS-3	AIS-4	AIS-5	AIS-6	AIS-7	AIS-8	AIS Total
1	1	65	1	3	1	1	1	1	2	2	2	0	1	0	0	1	0	0	0	0	0	1	0	1	1	1	1	1	1	7
2	1	65	1	3	2	2	2	1	2	2	2	0	1	0	0	0	0	0	0	0	0	0	0	0	1	1	0	0	1	3
3	0	65	1	3	1	1	1	1	2	2	2	0	0	1	0	0	0	0	0	0	0	0	0	0	1	0	1	0	1	3
4	0	65	1	3	1	1	1	2	2	2	2	0	1	1	0	0	0	0	0	0	0	0	0	0	0	1	0	0	1	2
5	0	65	2	3	1	1	1	1	2	2	2	0	1	0	0	0	0	0	0	0	0	1	0	1	0	1	0	0	0	3
6	0	65	1	99	1	1	1	1	2	2	2	0	0	1	0	0	0	0	0	0	0	0	0	1	1	0	0	0	1	3
7	0	65	1	3	1	1	1	1	2	2	2	0	1	0	0	0	0	0	0	0	0	0	0	0	1	1	0	0	1	3
8	0	65	1	3	2	2	1	1	2	1	3	0	0	1	0	0	0	0	0	0	0	2	0	1	1	1	1	0	1	7
9	1	65	1	3	2	2	2	1	2	2	2	0	1	0	0	0	0	0	0	0	0	0	1	0	1	1	0	1	1	5
10	0	65	1	3	2	2	1	1	1	2	2	0	1	0	0	0	0	0	0	0	0	0	0	0	0	0	0	1	1	2
11	1	65	1	3	1	1	1	2	2	2	2	0	1	1	0	0	0	0	0	0	0	0	0	0	0	1	0	0	1	2
12	1	65	1	3	4	1	2	1	2	2	1	0	1	0	0	0	0	0	0	0	0	1	2	2	2	2	3	0	3	15
13	0	65	1	1	1	1	1	1	2	2	2	0	1	0	0	0	0	0	0	0	0	0	0	0	1	1	0	0	1	3
14	0	65	1	3	1	2	1	2	3	2	2	0	1	1	0	0	0	0	0	0	0	1	0	1	1	0	0	0	1	4
15	0	65	1	3	1	1	1	1	3	2	2	0	0	1	0	0	0	0	0	0	0	1	0	0	1	1	1	1	1	6
16	0	65	1	3	1	2	2	1	2	1	3	0	1	1	0	0	0	0	0	0	0	0	0	0	0	0	0	0	1	1
17	1	65	1	3	1	2	1	1	2	2	2	0	1	0	0	0	0	1	0	0	0	0	0	0	0	0	0	0	0	0
18	0	65	1	3	3	2	1	2	2	2	2	0	1	0	0	0	0	0	0	0	0	0	0	0	1	0	0	0	1	2
19	0	65	1	3	1	2	1	1	2	2	2	0	1	1	0	0	0	0	0	0	0	1	0	1	0	0	0	0	1	3
20	0	65	1	3	1	1	1	1	2	2	2	0	1	1	0	0	0	0	0	0	0	0	0	0	0	0	1	1	1	3
21	0	65	1	3	1	1	1	1	2	2	2	0	1	1	0	1	0	0	0	0	0	1	0	0	1	0	0	0	1	3
22	1	65	1	3	1	1	2	1	99	2	2	0	1	0	0	0	0	0	0	0	0	1	1	2	1	1	1	1	1	9
23	0	65	1	3	1	1	1	1	1	2	2	0	1	1	1	0	0	0	0	0	0	1	1	2	1	1	1	2	1	10
24	1	65	2	3	2	1	1	1	2	1	3	1	0	0	0	0	0	0	0	0	0	0	0	0	0	1	0	0	1	2
25	0	65	1	3	1	1	1	1	2	2	1	0	1	0	0	0	0	0	0	0	0	0	0	0	1	1	1	1	1	5
26	1	65	2	3	2	2	2	2	2	1	2	0	0	1	0	0	0	0	0	0	0	2	1	1	2	2	1	1	2	12
27	1	65	1	3	1	2	1	1	2	2	1	0	1	0	0	0	0	0	0	0	0	0	0	0	0	0	0	0	0	0
28	1	65	1	3	2	1	2	1	2	1	2	0	1	0	0	0	0	0	0	0	0	0	0	0	0	1	0	0	1	2
29	1	65	1	3	1	1	1	1	2	2	1	0	1	0	0	0	0	0	0	0	0	0	0	1	0	0	0	0	1	2
30	0	65	1	3	1	1	1	1	2	2	1	0	1	1	0	0	0	0	0	0	0	0	0	0	0	0	0	1	1	2
31	1	65	1	3	1	1	1	1	2	2	2	0	1	0	0	0	0	0	0	0	0	1	0	0	0	0	0	0	1	2
32	1	65	1	3	1	2	1	1	2	2	1	0	1	0	0	0	0	0	0	0	0	0	2	2	2	2	1	2	2	13
33	1	65	1	3	1	1	1	1	2	2	2	0	1	0	0	0	0	0	0	0	0	0	0	0	1	1	0	0	1	3
34	1	65	1	3	1	1	1	1	2	2	1	0	1	1	1	0	1	0	0	0	0	0	0	0	0	0	0	0	1	1
35	1	65	1	3	1	1	1	1	2	2	2	0	1	0	0	0	0	0	0	0	0	0	0	1	0	1	0	3	2	7
36	1	65	2	3	2	3	2	2	3	1	2	0	1	1	0	1	0	0	0	0	0	1	0	0	1	1	0	0	1	4
37	0	65	1	3	2	2	1	1	2	2	3	0	1	1	0	0	0	0	0	0	0	0	0	0	1	1	0	0	1	3
38	0	65	2	3	2	2	1	2	2	1	1	0	1	1	0	0	0	0	0	0	0	1	1	1	1	1	0	0	1	6
39	1	65	2	3	2	2	99	2	3	99	3	0	0	1	0	0	0	0	0	0	0	2	1	1	2	2	1	1	1	11
40	1	65	2	3	2	2	2	2	3	1	2	0	1	0	0	0	0	1	0	0	0	1	0	0	1	1	0	0	1	4
41	0	65	2	3	2	2	1	1	2	1	2	0	1	0	0	0	0	1	0	0	0	2	0	0	0	1	0	0	1	4
42	0	65	2	5	4	2	1	2	2	1	1	1	0	0	0	0	0	0	0	0	0	1	0	1	0	1	0	0	1	4
43	0	65	2	3	2	2	1	1	3	1	2	1	0	0	0	0	0	0	0	0	0	1	1	1	1	1	1	1	2	9
44	1	65	2	3	2	2	1	1	3	1	2	0	0	1	0	0	0	0	0	0	0	0	0	0	0	0	0	0	0	0
45	1	65	2	3	3	2	1	1	2	1	1	1	0	0	0	0	0	0	0	0	0	0	0	0	0	1	0	0	1	2
46	1	65	2	3	2	2	1	2	3	1	3	1	0	0	0	0	0	0	0	0	0	0	0	1	0	0	0	1	1	3
47	0	65	2	3	2	1	99	2	2	99	2	0	1	0	0	0	0	0	0	0	0	0	0	0	0	0	0	0	0	0
48	1	65	1	1	1	1	1	1	2	1	1	0	1	1	1	0	0	0	0	0	0	99	1	1	0	1	0	1	1	104
49	0	65	1	3	1	1	1	1	2	2	2	0	1	0	0	0	0	0	0	0	0	0	1	0	0	1	0	0	1	3
50	1	65	2	3	2	1	1	1	2	1	2	0	0	1	0	0	0	1	0	0	0	0	0	0	0	0	0	0	0	0
51	1	65	1	1	1	1	2	1	2	1	1	0	1	0	0	0	0	0	0	0	0	1	0	1	1	1	0	0	1	5
52	1	65	1	3	1	1	1	1	2	2	2	0	1	0	0	0	0	0	0	0	0	0	0	1	1	1	0	0	1	4
53	1	65	1	3	1	1	1	1	2	2	2	0	1	0	0	1	0	0	0	0	0	1	0	1	1	1	0	1	1	6
54	0	65	1	3	1	1	1	1	2	2	1	0	1	1	0	0	0	0	0	0	0	0	0	0	0	0	0	0	0	0
55	0	65	1	3	6	1	1	1	2	2	1	0	1	1	0	0	0	0	0	0	0	0	0	0	0	0	0	0	1	1
56	0	65	2	3	2	2	1	1	2	1	3	0	1	1	0	0	0	0	0	0	0	1	1	1	1	1	0	1	1	7
57	1	65	2	3	3	2	2	1	2	1	1	0	0	1	0	0	1	0	0	0	1	0	0	0	0	0	0	1	1	2
58	0	65	1	3	1	1	1	1	2	1	2	0	1	1	0	0	0	0	0	0	0	0	0	1	0	1	0	0	2	4
59	1	65	1	3	1	1	2	1	2	2	99	0	1	0	0	0	0	0	0	0	0	0	0	0	0	0	0	0	1	1
60	0	65	1	3	1	1	1	1	2	2	1	0	1	1	0	0	0	0	0	0	0	0	0	1	1	1	0	0	1	4
61	0	65	1	3	1	1	1	1	99	2	2	0	0	1	0	0	0	0	0	0	0	1	1	2	1	1	1	1	1	9
62	0	65	1	3	3	2	1	1	2	1	3	1	0	0	0	0	0	0	0	0	1	0	0	1	1	1	0	0	0	3
63	1	65	1	3	1	2	99	1	2	99	2	0	1	0	0	0	0	0	0	0	0	0	0	0	0	0	0	0	0	0
64	0	65	1	3	2	2	1	1	2	1	2	1	1	0	0	0	0	0	0	0	0	1	1	1	1	1	1	1	1	8
65	0	65	1	3	1	1	1	1	2	2	2	0	1	1	0	0	0	0	0	0	0	0	0	0	0	0	0	1	1	2
66	0	65	1	3	2	1	99	1	2	99	1	0	1	0	0	0	0	0	0	0	0	1	1	0	0	0	0	1	1	4
67	1	65	1	3	2	1	1	1	2	2	3	0	0	0	1	0	0	0	0	0	0	1	1	0	1	1	0	0	1	5
68	0	65	1	3	2	2	1	1	2	2	2	0	1	0	0	0	0	0	0	0	0	0	0	0	0	0	0	0	99	99
69	0	65	2	3	1	1	1	1	2	1	2	0	1	0	0	0	0	0	0	0	0	2	1	2	1	1	0	0	1	8
70	1	65	2	3	2	1	1	2	2	1	2	0	0	0	0	0	0	0	0	1	0	1	1	1	0	0	0	1	0	4
71	0	65	2	3	1	2	1	2	2	1	99	99	99	99	99	99	99	99	99	99	99	99	99	99	99	99	0	0	99	594
72	1	65	1	3	1	2	1	1	3	2	2	0	1	0	0	0	0	1	0	0	0	2	2	2	2	2	0	2	1	13
73	1	65	1	1	1	1	1	1	2	2	1	0	1	1	0	0	0	0	0	0	0	0	0	1	0	0	0	0	1	2
74	1	65	2	3	3	2	1	1	2	1	2	0	1	0	0	0	0	1	0	0	1	2	2	3	3	3	99	2	1	115
75	1	65	1	3	3	2	1	2	3	2	2	1	0	0	0	0	0	0	0	0	0	1	0	0	1	0	0	0	1	3
76	0	65	1	3	1	1	1	1	2	2	2	0	1	0	0	0	0	0	0	0	0	0	0	1	1	1	0	0	0	3
77	0	65	1	3	6	2	1	1	2	2	3	0	1	0	0	0	0	0	0	0	0	0	0	0	0	0	0	0	1	1
78	1	65	1	3	1	1	2	1	3	2	1	0	1	1	1	0	0	1	0	0	0	1	1	2	0	1	1	2	1	9
79	1	65	1	3	2	2	2	1	2	2	2	0	1	0	0	0	0	0	0	0	0	0	0	0	0	0	0	1	0	1
80	0	65	1	3	2	2	1	2	2	1	2	0	1	1	0	0	0	0	0	0	0	1	1	1	1	1	1	2	1	9
81	0	65	1	3	1	1	1	99	2	2	2	0	1	0	0	0	0	0	0	0	0	1	0	1	1	0	0	0	0	3
82	0	65	1	3	2	1	1	1	2	2	2	0	1	0	0	0	0	0	0	0	1	1	0	1	1	1	0	0	1	5
83	0	65	1	3	1	1	1	1	2	2	1	0	1	0	0	0	0	0	0	0	0	0	0	1	1	1	0	0	2	5
84	1	65	2	3	3	3	2	2	3	1	2	0	0	0	0	1	0	1	0	0	0	1	2	2	1	1	1	2	2	12
85	0	65	2	3	4	2	1	1	1	1	1	0	1	1	0	0	0	0	0	0	0	1	0	0	0	0	0	0	0	1
86	0	65	1	3	2	2	1	1	2	2	1	0	1	1	0	0	0	0	0	0	0	0	0	0	1	0	0	0	1	2
87	1	65	1	3	1	2	1	1	2	2	2	0	1	0	0	0	0	1	0	0	0	0	0	0	0	0	0	0	1	1
88	0	65	1	3	1	1	1	1	2	2	1	0	1	1	0	0	0	0	0	0	0	0	0	1	1	1	0	0	1	4
89	0	65	1	3	1	2	1	1	1	2	3	0	0	1	0	0	0	0	0	0	0	1	1	1	1	1	0	0	1	6
90	0	65	1	3	3	2	1	1	2	99	1	0	1	0	0	0	0	0	0	0	0	0	0	0	1	1	0	1	1	4
91	0	65	2	3	1	1	1	1	2	1	2	0	0	1	0	0	0	0	0	0	0	1	0	1	0	1	0	0	1	4
92	1	65	1	3	1	1	1	2	3	2	2	1	0	0	0	0	0	0	0	0	0	0	0	1	0	0	0	0	1	2
93	0	65	1	3	1	2	2	1	2	1	2	0	1	0	0	0	0	0	0	0	0	0	0	0	1	1	0	0	1	3
94	0	65	2	3	2	2	1	1	2	1	2	0	0	1	1	0	0	0	0	0	1	0	0	0	0	0	0	0	1	1
95	0	65	2	3	2	2	1	2	2	1	2	0	1	1	0	0	0	0	0	0	0	2	0	0	0	1	0	0	0	3
96	1	65	1	3	1	1	1	1	2	2	1	0	1	1	0	0	0	0	0	0	0	1	0	0	0	0	0	0	1	2
97	1	65	1	3	1	1	2	1	2	1	3	0	1	0	0	0	0	0	0	0	0	1	1	2	1	1	0	0	1	7
98	1	65	2	3	2	1	1	1	2	1	2	0	1	1	0	0	0	0	0	0	0	1	0	0	0	0	0	0	1	2
99	1	65	1	3	1	1	2	99	99	2	2	0	1	0	0	0	0	0	0	0	0	99	99	99	99	99	0	0	0	495
100	0	65	1	3	1	1	1	1	2	2	1	0	1	1	0	0	0	0	0	0	0	0	0	1	1	1	0	0	0	3
101	1	65	1	3	1	1	1	1	2	2	2	0	1	0	0	1	0	0	0	0	0	1	0	0	1	0	0	0	0	2
102	1	65	1	3	1	1	1	1	2	2	1	0	1	0	0	0	0	0	0	0	0	0	0	1	0	0	0	0	0	1
103	0	65	1	3	2	1	2	1	99	2	2	0	1	0	0	0	0	0	0	0	0	0	0	0	0	0	0	1	1	2
104	0	65	1	3	2	3	1	2	3	2	2	0	0	1	0	0	0	0	0	0	0	1	1	1	1	1	2	2	1	10
105	1	65	2	5	3	1	1	2	2	1	2	1	0	0	0	0	0	0	0	0	0	2	0	0	0	0	1	1	2	6
106	0	65	2	3	1	1	1	1	2	1	1	0	1	0	0	0	0	0	0	0	0	0	0	0	0	0	0	1	1	2
107	0	65	1	3	1	1	1	1	2	2	1	0	1	1	1	0	0	0	0	0	0	0	0	1	1	1	0	0	1	4
108	0	65	1	3	1	1	1	1	2	2	2	1	0	0	0	0	0	0	0	0	0	0	0	0	0	0	1	2	1	4
109	1	65	1	3	1	1	2	1	1	2	2	0	1	0	0	0	0	0	0	0	0	0	2	0	0	2	1	1	1	7
110	0	65	1	5	1	1	1	1	2	2	2	0	1	0	0	0	0	0	0	0	0	0	0	0	0	0	0	0	1	1
111	0	65	2	3	2	2	1	2	2	1	3	0	0	1	0	0	0	0	0	0	0	2	1	2	1	1	1	1	1	10
112	1	65	1	3	1	1	1	1	2	2	1	0	1	0	0	0	0	0	0	0	0	0	0	0	1	0	0	0	1	2
113	0	65	1	3	1	1	1	1	2	2	2	0	1	1	0	1	0	0	0	0	0	1	0	0	1	1	0	0	1	4
114	0	65	1	3	1	1	1	1	3	2	2	0	0	0	0	0	0	0	0	0	1	0	0	0	1	0	1	0	1	3
115	0	65	1	3	2	2	1	1	2	2	2	0	1	1	0	0	0	1	0	1	0	0	0	1	1	1	0	0	1	4
116	1	65	1	3	2	1	2	1	2	2	2	0	1	0	0	0	0	0	0	0	0	0	0	1	0	1	0	0	0	2
117	0	65	1	3	2	2	1	1	2	1	1	0	1	1	0	0	0	0	0	0	0	0	0	0	0	0	0	0	0	0
118	1	65	1	3	3	2	2	1	3	2	2	0	1	0	0	0	0	0	0	0	0	0	0	1	0	1	0	1	1	4
119	0	65	2	3	1	1	1	1	2	1	2	0	1	1	0	0	0	0	0	0	0	1	1	1	1	1	0	1	1	7
120	1	65	1	3	1	1	2	2	2	2	1	0	1	0	0	0	0	0	0	0	0	1	1	1	1	1	0	1	1	7
121	0	65	1	3	1	1	2	2	2	2	1	0	1	1	0	0	0	0	0	0	0	0	0	1	0	1	0	1	1	4
122	1	65	1	3	1	1	1	1	2	2	2	0	1	0	0	0	0	0	0	0	0	0	1	1	1	1	1	1	1	7
123	1	65	1	3	2	2	1	1	2	2	2	0	1	0	0	0	0	1	0	0	0	1	1	1	0	1	0	0	1	5
124	1	65	2	3	2	2	2	1	2	1	2	0	0	0	0	1	0	0	0	0	0	0	0	1	1	1	0	0	1	4
125	1	65	2	3	2	2	2	2	3	1	2	0	0	1	0	0	0	1	0	0	0	0	1	1	2	2	1	1	2	10
126	0	65	1	1	1	1	99	1	2	99	2	0	1	0	0	0	0	0	0	0	0	2	0	1	1	1	0	0	1	6
127	1	65	2	3	3	2	1	2	99	1	1	0	1	0	0	0	0	0	0	0	0	1	1	2	1	1	1	1	1	9
128	0	65	1	3	6	2	1	1	2	2	2	0	1	0	0	0	0	0	0	0	0	0	0	1	0	0	1	0	1	3
129	0	65	1	3	2	2	2	2	2	2	2	0	1	0	0	0	0	0	0	0	0	0	1	2	1	1	2	3	1	11
130	0	65	1	5	1	1	1	1	2	2	1	0	1	1	0	1	0	1	0	0	0	2	1	2	1	1	1	1	1	10
131	1	65	1	3	1	1	1	1	2	2	2	0	1	1	0	0	0	0	0	0	0	0	0	0	0	0	0	0	1	1
132	0	65	2	3	3	2	2	1	2	1	1	0	0	1	0	0	0	0	0	0	1	0	1	2	1	1	0	1	0	6
133	0	65	1	3	1	1	1	1	2	2	1	0	1	0	0	0	0	0	0	0	0	0	0	0	0	1	0	0	1	2
134	0	65	1	3	1	2	1	1	2	2	2	0	1	1	0	0	0	0	0	0	0	0	0	0	1	1	1	0	1	4
135	1	65	1	3	1	1	1	1	2	2	1	0	1	0	0	0	0	0	0	0	0	0	0	1	0	1	0	0	0	2
136	0	65	1	3	1	1	1	1	2	2	2	0	1	0	0	0	0	0	0	0	0	0	0	1	0	0	0	0	1	2
137	0	65	1	3	1	1	1	1	2	2	2	1	0	0	0	0	0	0	0	0	0	0	0	1	1	0	0	0	1	3
138	1	65	1	1	1	1	99	1	2	99	2	0	1	0	0	0	0	0	0	0	0	1	1	1	1	1	0	1	1	7
139	0	65	1	3	1	1	1	1	99	2	1	0	1	1	0	0	0	0	0	0	0	0	0	0	0	0	99	1	1	101
140	1	65	1	3	2	1	2	1	2	1	2	0	1	0	0	0	0	0	0	0	0	0	1	1	0	1	0	0	1	4
141	0	65	1	3	1	1	1	1	2	2	1	0	1	1	0	0	0	0	0	0	0	0	0	0	0	0	0	0	1	1
142	0	65	1	3	1	2	1	1	2	2	1	0	1	1	0	0	0	0	0	0	0	0	0	0	0	0	0	0	0	0
143	1	65	1	3	1	1	1	1	2	2	2	0	1	0	0	0	0	0	0	0	0	0	0	0	0	0	0	0	0	0
144	1	65	2	3	2	2	2	1	2	1	3	0	0	1	0	0	0	0	0	0	0	0	0	1	1	1	0	0	1	4
145	0	65	1	3	1	1	1	1	2	2	2	0	1	1	0	0	0	0	0	0	0	0	0	0	0	0	0	0	1	1
146	0	65	1	3	1	1	1	1	2	2	2	0	1	0	0	0	0	0	0	0	0	0	0	0	0	0	0	0	0	0
147	0	65	1	3	3	2	1	1	1	1	2	0	0	1	0	0	0	0	0	0	0	2	1	1	0	1	2	2	1	10
148	1	65	1	1	4	2	1	2	3	2	2	1	0	0	0	0	0	0	0	0	0	2	2	2	2	2	2	1	2	15
149	1	65	1	3	1	1	1	1	2	2	2	0	1	1	0	0	0	0	0	0	0	0	0	0	1	1	0	0	1	3
150	0	65	1	3	1	1	1	2	1	2	1	0	1	0	0	0	0	0	0	0	0	2	0	2	1	1	0	0	2	8
151	0	65	1	3	1	1	1	1	2	2	2	0	1	1	0	0	0	0	0	0	0	1	0	0	0	1	1	1	1	5
152	0	65	1	3	1	1	1	1	2	2	1	0	1	0	0	0	0	1	0	0	0	1	0	1	0	1	0	0	1	4
153	0	65	1	3	2	1	1	1	3	2	2	0	1	0	0	0	0	1	0	0	0	1	1	1	1	2	0	1	2	9
154	0	65	1	3	1	1	1	2	2	1	2	0	1	1	0	0	0	0	0	0	0	0	0	0	0	1	1	2	1	5
155	1	65	1	3	1	1	2	1	2	2	2	0	1	1	0	0	0	0	0	0	0	0	0	1	1	1	0	1	1	5
156	0	65	1	3	1	1	1	1	2	2	2	0	1	0	0	0	0	0	0	0	0	1	0	1	0	0	1	1	1	5
157	0	65	1	3	2	2	1	1	2	2	2	0	1	0	0	0	0	0	0	0	0	0	0	0	99	0	0	0	0	99
158	0	65	1	3	1	1	1	1	2	2	2	0	0	1	0	0	0	1	0	0	0	1	2	2	2	2	2	1	1	13
159	0	65	2	3	3	3	2	2	3	1	2	0	0	0	0	0	0	1	1	0	1	99	99	99	0	0	3	3	0	303
160	0	65	1	3	1	1	1	1	2	2	1	0	1	0	0	0	0	0	0	0	0	0	0	1	1	1	0	0	1	4
161	1	65	1	3	1	1	1	1	2	2	1	0	1	1	0	0	0	1	0	0	0	0	1	1	1	1	0	1	1	6
162	1	65	2	3	1	2	2	2	3	1	2	0	1	0	0	0	0	0	0	0	0	0	1	0	0	1	1	1	1	5
163	0	65	1	3	1	1	1	1	2	2	2	0	1	1	0	0	0	0	0	0	0	0	0	0	0	0	0	0	1	1
164	0	65	1	3	3	2	2	2	3	1	2	0	1	0	0	0	0	0	0	0	0	2	1	2	1	2	2	2	1	13
165	0	65	1	3	1	1	1	1	2	2	1	0	1	1	0	0	0	0	0	0	0	1	0	0	1	1	1	0	1	5
166	1	65	2	3	2	3	1	1	3	2	2	0	1	0	0	0	0	0	0	0	0	2	2	1	2	2	1	1	1	12
167	0	65	1	3	2	3	1	2	2	1	3	0	1	1	0	0	0	0	0	0	0	3	3	3	2	2	1	2	1	17
168	0	65	1	3	1	2	1	1	2	2	2	0	0	1	0	0	0	0	0	0	0	0	1	1	0	1	0	1	1	5
169	0	65	1	3	1	1	1	1	2	2	2	0	1	0	0	0	0	0	0	0	0	2	1	1	1	1	1	1	1	9
170	0	65	1	3	1	1	1	1	2	2	1	0	1	0	0	0	0	0	0	0	0	2	1	1	1	2	1	1	2	11
171	0	65	1	3	3	2	99	1	2	99	2	0	0	1	0	0	0	0	0	0	0	0	0	0	0	0	0	1	1	2
172	0	65	1	3	2	1	1	1	2	2	2	0	1	1	0	1	0	0	0	0	0	0	1	1	0	0	1	0	1	4
173	0	65	1	3	2	1	1	1	2	2	2	0	1	0	0	0	0	0	0	0	0	1	1	1	1	1	1	1	1	8
174	0	65	1	3	1	1	1	1	2	2	2	0	1	0	0	0	0	0	0	0	0	0	0	1	0	0	1	0	1	3
175	1	65	1	3	2	2	1	1	3	2	1	0	1	0	0	1	0	0	0	0	0	1	0	0	1	1	0	0	1	4
176	1	65	1	3	1	1	1	1	2	2	2	0	1	0	0	0	0	0	0	0	0	0	0	1	0	0	0	0	1	2
177	1	65	1	3	1	1	1	2	2	2	2	0	1	0	0	0	0	0	0	0	0	1	0	0	0	0	0	0	1	2
178	0	65	1	3	2	1	1	1	2	2	2	0	1	1	0	0	0	0	0	0	0	0	0	0	0	99	0	1	0	100
179	0	65	1	3	1	2	1	1	3	2	2	0	1	0	0	0	0	0	0	0	0	2	1	2	2	1	1	1	1	11
180	0	65	1	3	1	2	2	1	2	1	2	0	1	1	0	0	0	0	0	0	0	99	0	0	0	0	0	0	1	100
181	1	65	2	3	3	99	1	1	2	1	2	0	1	0	0	0	0	0	0	0	0	0	1	1	1	1	0	1	1	6
182	0	65	1	3	1	1	1	1	2	2	1	0	1	0	0	0	0	0	0	0	0	0	0	0	1	1	0	0	1	3
183	0	65	2	3	2	1	1	1	2	2	2	0	1	0	0	0	0	0	0	0	0	3	3	1	1	1	3	3	2	17
184	1	65	1	3	1	1	1	1	2	2	2	0	1	0	0	0	0	0	0	0	0	0	0	0	0	0	0	0	0	0
185	1	65	2	3	2	2	1	1	2	1	2	1	0	0	0	0	0	0	0	0	0	0	0	0	1	1	0	0	1	3
186	0	65	1	3	2	2	1	1	2	2	2	0	1	0	0	0	0	0	0	0	0	1	0	0	1	1	0	1	1	5
187	1	65	2	3	1	2	1	1	3	1	2	0	1	0	0	0	0	0	0	0	0	2	2	2	1	1	0	1	1	10
188	0	65	1	3	2	1	1	1	2	2	2	0	1	1	0	0	0	0	0	0	0	1	0	0	1	1	1	0	1	5
189	1	65	1	5	3	2	2	2	1	2	3	0	1	0	0	0	0	0	0	0	0	1	1	2	2	2	1	1	2	12
190	0	65	1	3	1	1	1	1	2	2	3	0	1	1	0	0	0	0	0	0	0	1	0	0	0	0	0	0	2	3
191	0	65	2	3	2	3	1	1	2	2	2	0	1	1	0	1	0	0	0	0	0	0	0	0	0	0	0	0	1	1
192	0	65	1	3	2	2	1	1	2	2	1	0	1	1	0	0	0	0	0	0	0	0	0	0	0	0	0	0	0	0
193	0	65	1	3	2	1	1	1	2	2	2	0	1	1	0	0	0	0	0	0	0	0	1	0	0	1	0	1	1	4
194	0	65	1	3	1	1	1	1	2	2	2	0	1	0	0	0	0	0	0	0	0	1	0	0	1	1	0	0	1	4
195	1	65	1	3	1	1	2	1	3	2	2	0	1	0	0	0	0	1	0	0	0	0	0	0	0	0	0	0	1	1
196	0	65	1	3	2	2	1	1	2	2	2	0	1	0	0	0	0	0	0	0	0	0	1	1	2	1	0	0	2	7
197	1	65	1	3	3	2	2	99	2	2	2	0	1	0	0	0	0	0	0	0	0	2	1	2	1	1	1	3	1	12
198	0	65	1	5	1	1	1	1	2	2	1	0	1	0	0	0	0	0	0	0	0	0	0	0	1	1	0	0	1	3
199	0	65	1	3	1	1	1	1	2	2	3	0	1	1	0	0	0	0	0	0	0	2	2	2	2	2	0	0	1	11
200	1	65	1	3	1	1	1	1	2	2	1	0	1	0	0	0	0	0	0	0	0	2	1	2	1	1	2	2	2	13
201	0	65	1	3	2	3	2	2	3	2	2	0	0	0	0	0	0	1	0	1	1	0	1	1	1	1	1	1	1	7
202	1	65	2	3	2	2	2	1	2	1	2	0	0	1	0	0	0	0	0	0	0	0	0	1	0	0	0	0	0	1
203	0	65	1	1	1	2	1	2	2	1	2	0	1	0	0	0	0	0	0	0	0	2	1	3	0	1	3	3	1	14
204	0	65	2	3	2	1	2	1	2	1	3	0	0	0	0	0	0	0	0	0	1	1	0	1	1	1	0	0	1	5
205	1	65	1	1	4	2	2	2	2	2	99	0	1	0	0	0	0	0	0	0	0	0	0	0	0	0	0	0	0	0
206	0	65	2	3	1	1	1	99	3	1	2	0	0	0	0	0	0	1	0	0	1	0	0	0	0	1	1	2	1	5
207	0	65	1	3	3	2	1	1	2	1	2	0	1	0	0	0	0	0	0	0	0	2	1	1	1	1	1	2	1	10
208	0	65	1	1	4	1	2	1	2	2	99	0	1	0	0	0	0	0	0	0	0	0	0	0	99	0	0	0	0	99
209	0	65	2	3	3	2	1	1	2	1	1	0	0	1	0	0	0	0	0	0	0	1	0	0	0	1	0	0	1	3
210	1	65	2	3	2	2	1	2	2	1	3	1	0	0	0	0	0	0	0	0	0	3	1	1	1	2	1	2	2	13
211	1	65	1	5	3	2	2	1	3	2	2	0	1	0	0	0	0	1	0	0	0	2	2	3	2	2	1	2	2	16
212	0	65	1	3	2	2	1	2	3	2	2	0	0	1	0	0	0	0	0	0	0	2	1	2	2	2	1	2	1	13
213	1	65	1	3	2	2	2	2	2	2	2	0	1	0	0	0	0	0	0	0	0	0	0	1	0	0	0	1	1	3
214	1	65	99	3	3	99	2	2	1	1	2	0	0	0	0	0	0	0	0	1	0	2	3	3	2	2	2	3	2	19
215	1	65	1	3	2	2	1	2	3	1	3	1	0	0	0	0	0	0	0	0	0	0	0	1	2	2	0	0	2	7
216	0	65	1	3	1	1	1	1	2	2	2	0	1	1	1	0	0	0	0	0	0	0	0	0	0	0	0	0	0	0
217	0	65	1	1	1	1	1	1	2	2	2	0	1	0	0	0	0	0	0	0	0	0	0	0	1	1	0	0	1	3
218	0	65	2	3	3	99	1	2	3	1	2	0	1	0	0	0	0	0	0	0	0	2	2	2	2	2	2	2	99	113
219	0	65	2	3	2	2	1	2	3	1	3	1	0	0	0	0	0	0	0	0	0	2	2	3	3	3	3	3	3	22
220	1	65	1	3	1	1	2	1	2	2	2	0	1	1	0	0	0	1	0	0	0	0	0	1	0	0	0	0	0	1
221	0	65	1	3	1	1	2	1	2	2	2	0	1	0	0	0	0	0	0	0	0	0	0	0	0	0	1	1	1	3
222	0	65	1	3	2	2	1	1	3	2	2	0	1	0	0	0	0	0	0	0	0	0	0	0	0	1	1	2	2	6
223	1	65	1	3	1	1	1	1	2	2	1	0	0	1	0	0	0	0	0	0	0	2	2	0	0	1	0	0	1	6
224	0	65	2	3	2	1	1	2	3	1	2	0	1	0	0	0	0	0	0	0	0	3	1	2	2	2	1	2	2	15
225	0	65	1	3	1	2	1	1	2	2	3	0	1	1	0	0	0	0	0	0	0	1	0	0	0	1	0	0	1	3
226	0	65	1	3	2	2	1	2	2	2	2	0	1	0	0	0	0	0	0	0	0	1	1	3	1	2	2	1	1	12
227	1	65	99	5	99	99	99	99	99	99	99	99	99	99	99	99	99	99	99	99	99	99	99	99	99	99	99	99	99	792
228	1	66	1	3	1	1	2	1	3	2	2	0	1	0	0	0	0	0	0	0	0	3	1	1	2	2	1	1	2	13
229	1	66	1	3	1	1	1	1	2	2	3	0	1	0	0	0	0	1	0	0	0	0	0	0	0	0	0	0	1	1
230	1	66	1	3	2	2	1	1	2	1	2	1	1	0	0	0	0	0	0	0	0	1	1	2	1	1	1	1	1	9
231	1	66	1	3	1	1	1	1	2	2	1	0	1	0	0	0	0	0	0	0	0	1	1	1	1	1	0	0	1	6
232	0	66	1	3	2	2	1	1	3	2	2	0	1	1	1	0	0	1	0	0	0	99	0	0	0	1	0	1	1	102
233	0	66	2	1	3	2	1	1	2	1	2	0	0	1	0	0	0	0	0	0	0	0	0	0	1	1	1	1	1	5
234	1	66	1	3	1	1	1	1	2	2	2	0	1	0	0	0	0	0	0	0	0	1	2	2	2	2	1	1	2	13
235	0	66	1	3	3	2	1	1	2	2	2	0	1	1	0	0	0	0	0	0	0	0	0	0	1	0	1	0	1	3
236	1	66	2	3	1	1	1	1	2	1	3	0	0	1	0	0	0	0	0	0	0	1	0	0	0	1	0	0	1	3
237	0	66	1	3	2	1	1	1	3	2	2	0	1	0	0	0	0	0	0	0	0	1	0	1	0	0	2	1	1	6
238	1	66	1	3	1	1	1	1	2	2	1	0	1	0	1	0	0	0	0	0	0	0	1	2	1	1	0	1	1	7
239	1	66	1	3	1	1	2	2	2	2	2	0	1	0	0	0	0	0	0	0	0	0	0	0	1	0	0	0	1	2
240	1	66	1	3	1	1	1	1	2	2	3	0	1	0	0	0	0	1	0	0	0	2	1	1	1	1	1	1	1	9
241	1	66	1	3	1	2	1	1	2	2	2	0	1	1	0	1	0	1	0	0	0	0	0	0	0	0	0	0	1	1
242	0	66	2	5	3	2	1	1	3	3	1	0	0	1	0	0	0	0	0	0	0	0	0	0	0	0	0	0	0	0
243	1	66	1	5	3	2	2	2	2	2	2	0	1	0	0	0	0	0	0	0	0	0	0	1	0	0	0	0	0	1
244	1	66	1	3	1	1	1	1	2	2	1	0	1	0	0	0	0	0	0	0	0	0	0	0	0	0	0	0	1	1
245	0	66	1	1	1	1	1	1	2	2	1	0	1	1	1	0	0	0	0	0	0	0	0	0	0	0	0	0	1	1
246	1	66	1	3	6	1	1	1	3	2	2	0	1	0	0	0	0	0	0	0	0	0	0	1	1	0	0	0	1	3
247	0	66	1	3	2	2	1	1	2	2	2	0	1	0	0	0	0	0	0	0	0	0	0	0	0	0	0	0	0	0
248	0	66	1	3	1	1	1	1	2	2	2	0	1	1	0	0	0	0	0	0	0	0	0	0	0	0	0	0	0	0
249	0	66	1	3	1	1	1	1	2	2	2	0	1	0	0	0	0	0	0	0	0	0	0	0	0	0	0	0	0	0
250	1	66	2	3	3	2	2	2	3	1	2	1	0	0	0	0	0	0	0	0	0	3	2	2	1	3	0	1	0	12
251	0	66	1	3	1	1	2	1	2	2	3	0	1	0	0	0	0	0	0	0	0	1	0	0	0	0	0	0	0	1
252	1	66	1	3	1	1	1	1	2	2	2	0	1	0	0	0	0	0	0	0	0	2	1	2	0	2	1	1	0	9
253	0	66	1	3	1	1	1	1	2	1	2	0	1	1	0	0	0	0	0	0	1	0	0	0	0	0	0	2	0	2
254	0	66	1	3	1	1	2	1	2	1	2	0	0	1	0	0	0	0	0	0	0	0	0	0	1	1	0	1	1	4
255	0	66	1	3	1	1	1	1	2	2	2	0	1	0	0	0	0	0	0	0	0	0	0	0	0	0	0	0	0	0
256	1	66	2	3	3	2	2	1	2	1	1	0	1	1	0	0	0	0	0	0	1	1	0	0	0	1	0	0	1	3
257	0	66	1	3	1	1	2	1	2	1	3	0	0	0	0	1	0	0	0	0	0	2	1	2	2	2	0	1	1	11
258	0	66	1	3	1	1	1	1	2	2	2	0	1	0	0	0	0	0	0	0	1	3	2	2	2	2	0	0	1	12
259	1	66	1	3	6	1	1	2	3	1	3	0	0	1	0	0	0	0	0	0	0	2	2	3	2	2	1	2	1	15
260	1	66	2	1	3	2	2	2	3	1	3	1	0	0	0	0	0	0	0	0	0	2	1	3	2	2	2	2	2	16
261	1	66	1	3	1	1	1	2	2	2	2	0	1	1	0	0	0	0	0	0	0	0	0	0	0	0	0	0	1	1
262	1	66	1	3	1	1	1	1	2	2	2	0	1	0	0	0	0	0	0	0	0	0	0	1	1	1	0	0	1	4
263	1	66	1	3	1	1	2	1	2	2	2	0	1	0	0	0	0	0	0	0	0	0	1	2	0	1	1	1	1	7
264	0	66	1	3	1	1	2	1	2	2	2	0	0	1	0	0	0	0	0	0	0	1	0	1	1	1	0	0	1	5
265	0	66	1	3	1	3	2	1	2	2	2	1	0	0	0	0	0	0	0	0	0	0	0	1	0	1	0	0	0	2
266	0	66	1	3	3	2	1	1	2	2	2	0	1	0	0	0	0	0	0	0	0	1	0	1	1	1	1	1	1	7
267	0	66	2	3	1	1	1	1	2	1	2	0	1	0	1	0	0	0	0	0	0	0	0	1	1	1	1	2	2	8
268	1	66	1	3	1	1	1	1	2	2	1	0	1	1	0	0	0	0	0	0	0	0	1	0	0	0	0	0	1	2
269	0	66	1	3	1	1	1	1	2	2	2	0	1	0	0	0	0	0	0	0	0	0	0	0	0	0	0	0	0	0
270	1	66	1	3	1	1	1	1	2	2	1	0	0	1	0	0	0	0	0	0	0	1	1	1	1	1	0	0	1	6
271	0	66	1	1	1	1	1	1	2	2	2	0	1	1	1	1	0	0	0	0	0	0	0	0	0	0	0	0	1	1
272	1	66	1	3	1	1	1	1	2	2	2	1	0	0	0	0	0	0	0	0	0	0	0	1	1	1	0	0	1	4
273	0	66	1	3	1	1	1	1	2	2	2	0	1	0	0	0	0	0	0	0	0	0	0	0	0	0	0	0	0	0
274	0	66	1	3	2	2	1	1	2	2	2	0	1	0	0	0	0	0	0	0	1	1	0	0	0	0	0	0	1	2
275	0	66	1	3	1	1	1	1	2	2	2	0	1	0	0	0	0	0	0	0	0	0	0	0	0	0	0	1	1	2
276	1	66	1	3	1	1	1	1	2	2	1	0	1	0	0	0	0	0	0	0	0	0	0	1	0	0	99	0	0	100
277	1	66	1	3	1	1	2	1	1	2	1	0	1	1	0	0	0	1	0	0	0	0	0	1	1	1	0	0	0	3
278	0	66	1	3	1	1	1	1	2	2	1	0	1	1	1	0	0	0	0	0	0	0	0	0	0	0	0	0	1	1
279	0	66	1	3	1	1	1	1	2	2	1	0	1	1	0	0	0	0	0	0	0	0	0	0	0	0	0	1	1	2
280	0	66	2	3	2	1	1	1	2	99	3	0	1	1	0	1	0	0	0	0	0	0	0	0	0	0	0	0	0	0
281	1	66	1	3	1	1	1	1	2	2	1	0	1	0	0	0	0	0	0	0	0	0	1	0	0	0	0	0	1	2
282	0	66	1	3	1	2	1	2	2	2	1	0	1	1	0	0	0	0	0	0	0	0	0	0	1	0	0	0	1	2
283	0	66	1	3	1	1	2	1	2	2	2	0	1	0	0	0	0	0	0	0	0	0	1	1	0	0	0	0	1	3
284	0	66	1	3	1	1	1	1	3	2	1	0	1	0	0	0	0	0	0	0	0	2	2	1	2	2	1	2	1	13
285	0	66	1	3	1	2	1	1	2	2	1	0	1	1	1	0	0	0	0	0	0	1	1	1	0	1	1	1	1	7
286	1	66	1	3	1	1	1	1	2	2	1	0	1	0	0	0	0	0	0	0	0	0	0	0	1	1	0	1	2	5
287	1	66	1	3	1	1	1	1	2	2	1	0	1	0	0	0	0	0	0	0	0	0	1	1	0	0	0	0	0	2
288	1	66	2	5	3	3	1	1	2	1	2	1	0	0	0	0	0	0	0	0	0	2	1	1	2	2	2	2	2	14
289	1	66	2	3	2	3	1	2	3	1	3	1	0	0	0	0	0	0	0	0	0	0	0	2	0	1	0	0	0	3
290	0	66	2	3	2	2	1	1	2	1	1	0	1	1	0	0	0	0	0	0	0	0	0	1	0	0	0	0	0	1
291	1	66	2	3	2	2	1	2	2	1	2	0	1	1	0	0	0	0	0	0	0	1	0	1	0	1	0	0	1	4
292	0	66	1	3	2	2	1	1	2	2	2	0	1	1	0	0	0	0	0	0	0	0	0	1	1	1	0	1	0	4
293	1	66	2	5	2	2	1	1	2	1	99	99	99	99	99	99	99	99	99	99	99	0	0	0	0	0	99	99	99	297
294	1	66	1	3	1	1	1	1	2	2	1	0	1	0	0	0	0	0	0	0	0	0	0	0	0	0	0	0	0	0
295	1	66	2	3	2	1	1	1	2	1	3	0	1	0	0	0	0	0	0	0	0	0	0	0	0	0	0	0	1	1
296	0	66	2	3	3	2	2	2	2	1	2	0	0	0	0	0	0	1	0	0	0	1	2	1	2	2	2	2	2	14
297	1	66	2	3	1	1	1	2	2	1	2	0	0	1	0	0	0	0	0	0	0	1	2	2	2	2	0	1	1	11
298	1	66	1	3	1	1	1	2	3	1	3	0	1	0	0	0	0	0	0	0	1	0	0	1	1	1	1	1	1	6
299	0	66	2	3	1	1	2	1	1	1	1	0	0	1	0	0	0	0	0	0	0	0	0	0	0	0	0	0	0	0
300	0	66	1	3	1	1	1	1	2	2	2	0	0	1	0	0	0	0	0	0	0	1	0	1	1	0	0	0	1	4
301	0	66	1	3	1	2	1	1	2	2	2	0	1	0	0	0	0	0	0	0	0	1	1	1	0	1	1	0	1	6
302	1	66	1	3	1	1	1	1	2	2	2	0	1	0	0	0	0	0	1	0	0	2	1	2	1	1	1	1	1	10
303	0	66	1	1	1	1	1	1	2	2	2	1	0	0	0	0	0	0	0	0	0	2	0	1	1	2	1	0	0	7
304	0	66	1	3	1	1	2	1	2	2	2	0	1	0	0	0	0	0	0	0	0	1	1	1	1	1	1	1	2	9
305	0	66	1	3	1	1	1	1	2	2	2	0	1	0	0	0	0	1	0	0	0	1	1	1	1	1	1	1	1	8
306	1	66	1	3	1	1	1	1	2	2	2	0	1	0	0	0	0	0	0	0	0	1	0	0	1	1	0	0	1	4
307	1	66	1	3	2	2	1	1	2	2	1	0	1	1	0	1	0	0	0	0	0	0	0	0	0	0	0	0	1	1
308	1	66	2	3	3	2	1	2	2	1	2	0	1	0	0	0	0	0	0	0	0	0	0	0	0	0	0	0	1	1
309	1	66	2	3	3	3	1	2	3	1	2	0	1	1	0	0	0	0	0	0	1	1	2	2	2	2	3	2	2	16
310	1	66	2	3	3	2	1	1	2	1	2	0	0	1	0	0	0	0	0	0	0	1	0	1	1	1	0	0	0	4
311	1	66	2	3	3	1	2	1	2	1	1	0	0	1	0	0	0	0	0	0	0	0	0	1	0	0	0	0	1	2
312	0	66	1	3	2	2	1	1	2	2	2	0	1	0	0	0	0	0	0	0	0	0	0	1	0	0	0	0	1	2
313	0	66	1	3	2	1	1	1	2	2	3	0	1	1	0	0	0	0	0	0	0	1	0	2	1	1	0	1	1	7
314	0	66	1	3	1	1	1	1	2	2	1	0	1	0	0	0	0	0	0	0	0	0	0	0	0	0	0	0	1	1
315	1	66	1	3	1	1	1	1	2	1	2	0	1	0	0	0	0	0	0	0	0	0	1	2	1	1	0	0	1	6
316	1	66	1	3	3	2	1	1	2	2	2	0	0	1	0	0	0	0	0	0	0	0	0	2	1	0	0	0	2	5
317	0	66	1	3	1	1	1	1	2	2	2	0	1	0	0	0	0	0	0	0	0	0	0	0	0	0	0	1	1	2
318	1	66	2	3	2	1	1	2	2	1	2	0	0	1	0	0	0	0	0	0	0	1	0	1	0	0	0	0	1	3
319	0	66	1	3	1	1	1	1	2	2	2	0	1	1	1	0	0	0	0	0	0	1	1	0	0	1	0	0	1	4
320	0	66	2	3	2	2	1	2	1	1	2	0	1	0	0	0	0	0	0	0	0	1	1	1	1	1	1	1	0	7
321	0	66	2	3	1	1	1	1	3	1	1	0	0	1	1	0	0	0	0	0	0	2	1	1	1	1	0	1	1	8
322	1	66	2	5	3	1	1	2	2	1	2	1	0	0	0	0	0	0	0	0	0	1	1	0	1	1	0	0	1	5
323	1	66	2	3	1	1	1	1	2	1	3	0	1	1	0	0	0	1	0	0	0	3	2	2	2	2	0	2	2	15
324	0	66	1	3	1	2	1	2	3	2	3	0	1	0	0	0	0	0	0	0	0	2	1	1	1	1	0	0	0	6
325	1	66	1	3	2	2	1	1	2	2	2	0	1	0	0	0	0	0	0	0	0	0	0	0	0	0	0	0	1	1
326	0	66	2	3	2	1	1	1	2	1	2	0	1	1	0	0	0	0	0	0	0	0	0	0	0	0	0	0	0	0
327	0	66	2	1	4	1	1	1	2	1	2	0	1	1	0	0	0	0	0	0	0	0	0	0	0	0	0	0	0	0
328	1	66	1	3	2	2	1	1	2	2	3	0	1	0	0	0	0	0	0	0	0	0	0	0	0	0	0	0	0	0
329	0	66	1	3	1	2	1	1	2	2	2	0	1	0	0	0	0	0	0	0	0	0	0	0	0	0	0	0	1	1
330	1	66	2	3	1	1	1	2	2	1	3	1	0	0	0	0	0	0	0	0	0	0	0	1	1	0	0	0	0	2
331	1	66	2	3	2	2	1	1	2	1	2	0	0	1	0	0	0	0	0	0	0	0	0	0	0	0	0	0	0	0
332	0	66	1	3	1	1	1	1	2	2	2	0	1	0	0	0	0	0	0	0	0	2	0	0	1	1	0	0	1	5
333	0	66	1	3	1	1	1	1	2	2	1	0	1	0	0	0	0	0	0	0	0	0	1	0	0	1	0	0	1	3
334	0	66	1	3	3	2	2	1	2	1	2	0	1	1	0	1	0	1	0	0	0	2	1	1	1	1	1	1	1	9
335	0	66	1	3	1	2	1	1	2	2	2	0	1	0	0	0	0	0	0	0	0	99	0	1	1	1	0	0	0	102
336	0	66	1	3	1	1	1	1	2	2	1	0	1	1	1	0	0	0	0	0	0	1	0	0	0	1	0	0	1	3
337	0	66	2	3	1	1	1	1	2	1	2	0	1	1	0	1	0	0	0	0	0	0	0	0	1	0	0	0	1	2
338	0	66	1	3	3	2	1	1	2	1	2	0	0	1	0	0	0	0	0	0	0	0	0	1	1	1	1	1	1	6
339	0	66	1	3	1	1	1	1	2	2	2	0	1	1	0	0	0	0	0	0	0	0	0	0	1	1	0	1	1	4
340	1	66	1	3	2	1	2	1	2	3	1	0	0	1	0	0	0	0	0	0	0	2	2	3	2	2	0	0	1	12
341	1	66	1	3	2	1	1	1	2	2	1	0	1	0	0	0	0	0	0	0	0	1	0	1	0	1	0	0	1	4
342	1	66	2	3	2	2	1	2	2	1	2	0	0	0	0	1	0	0	0	0	0	0	0	1	1	1	0	0	1	4
343	0	66	1	3	1	1	1	1	2	2	2	0	1	1	0	0	0	0	0	0	0	0	0	0	0	0	0	2	1	3
344	0	66	1	3	1	1	1	1	2	2	2	0	1	0	0	0	0	0	0	0	0	0	0	0	0	0	0	0	1	1
345	1	66	2	3	2	1	2	1	2	1	2	0	0	0	0	0	0	0	0	0	1	0	0	0	0	0	0	0	0	0
346	1	66	2	3	5	1	99	1	2	99	2	0	1	0	0	0	0	0	0	0	0	0	0	1	0	0	0	0	0	1
347	1	66	2	3	3	2	1	2	3	1	1	1	0	0	0	0	0	0	0	0	0	3	1	1	2	2	1	2	1	13
348	1	66	1	3	1	1	1	1	2	2	2	0	1	1	0	0	0	0	0	0	0	0	1	1	1	0	0	0	1	4
349	0	66	2	3	2	3	1	2	3	1	2	0	0	1	0	0	0	1	0	0	0	3	1	99	2	2	1	2	2	112
350	0	66	1	3	1	1	99	2	99	99	2	0	0	1	0	0	0	0	0	0	0	99	99	99	2	2	99	2	2	404
351	0	66	1	3	1	1	1	1	2	2	1	0	1	1	0	0	0	0	0	0	0	0	0	1	1	0	0	0	1	3
352	1	66	1	3	6	1	1	1	2	1	1	0	1	0	0	0	0	0	0	0	0	1	2	3	1	1	1	1	1	11
353	1	66	1	3	1	2	2	2	2	2	2	0	1	0	0	0	0	0	0	0	0	0	0	1	0	0	0	0	1	2
354	1	66	1	3	2	2	1	1	2	2	2	0	1	0	0	0	0	0	0	0	0	0	0	0	0	0	0	1	1	2
355	0	66	1	3	1	1	1	2	3	1	2	0	1	1	0	0	0	0	0	0	0	1	0	0	0	0	0	0	1	2
356	1	66	1	1	1	1	1	1	2	2	1	0	1	0	0	0	0	1	0	0	0	0	0	1	0	0	0	0	1	2
357	0	66	1	3	1	1	2	2	1	2	2	0	1	0	0	0	0	0	0	0	0	1	1	0	0	0	1	1	1	5
358	0	66	1	3	1	1	1	1	2	2	2	0	1	0	0	0	0	0	0	0	0	1	1	1	0	1	0	0	1	5
359	0	66	1	3	1	1	1	2	2	2	99	0	1	1	1	0	0	0	0	0	0	0	0	1	1	1	0	0	1	4
360	0	66	1	3	1	1	1	1	2	2	2	0	0	1	1	0	0	0	0	0	0	0	0	1	1	1	0	0	1	4
361	0	66	1	3	1	1	99	2	2	99	2	0	1	0	0	0	0	0	0	0	0	1	0	0	1	1	1	1	1	6
362	0	66	99	3	5	1	2	1	2	1	2	0	0	0	0	0	0	0	1	0	0	1	0	1	0	1	0	0	1	4
363	0	66	1	3	1	1	1	2	2	2	1	0	0	1	0	0	0	0	0	0	0	0	0	0	0	0	0	0	0	0
364	0	66	1	3	1	1	1	1	2	2	3	0	0	1	0	0	0	0	0	0	0	1	1	1	2	1	0	0	1	7
365	0	66	1	3	1	1	99	1	2	99	1	0	1	1	0	0	0	0	0	0	0	0	0	0	0	0	0	0	1	1
366	0	66	1	1	1	1	1	1	2	2	1	0	1	1	0	0	0	0	0	0	0	1	1	1	1	1	1	1	1	8
367	0	66	1	3	1	1	1	1	2	2	2	0	1	1	0	0	0	0	0	0	0	0	0	0	1	0	0	0	0	1
368	0	66	1	3	2	1	1	1	2	2	2	0	1	1	0	0	0	0	0	0	0	0	0	0	0	0	0	0	1	1
369	1	66	1	3	2	2	1	1	2	1	2	0	1	0	0	0	0	0	0	0	0	0	0	0	1	1	0	0	0	2
370	0	66	1	3	1	1	1	1	2	2	2	0	1	1	0	0	0	0	0	0	0	0	0	0	0	0	0	0	0	0
371	0	66	2	3	2	2	1	1	2	1	2	0	1	1	0	0	0	0	0	0	0	1	0	1	0	99	0	1	1	103
372	0	66	1	3	2	2	2	1	2	2	2	1	0	0	0	0	0	0	0	0	0	99	99	99	99	99	1	1	1	498
373	0	66	1	1	3	2	1	1	2	2	2	0	1	1	0	0	0	0	0	0	0	1	1	1	0	1	0	0	99	103
374	1	66	1	3	1	1	1	1	2	2	1	0	1	1	0	0	0	1	0	1	0	0	1	2	1	1	0	0	1	6
375	1	66	1	1	3	1	2	2	3	2	99	0	1	0	0	0	0	0	0	0	0	2	1	2	1	1	1	1	1	10
376	0	66	1	3	1	1	1	1	2	2	2	0	1	0	0	0	0	0	0	0	0	0	0	0	0	0	0	0	0	0
377	0	66	1	3	1	2	1	1	2	2	1	0	1	1	1	0	0	0	0	0	0	0	0	0	0	0	0	0	0	0
378	1	66	1	3	1	1	1	1	2	2	1	0	1	1	0	0	0	0	0	0	0	1	1	1	1	1	0	0	0	5
379	0	66	1	3	1	1	1	1	2	2	1	0	1	1	0	0	0	0	0	0	0	0	0	0	0	0	0	0	1	1
380	1	66	1	3	1	1	2	1	2	2	2	0	1	1	0	0	0	0	0	0	0	0	0	0	1	0	0	0	1	2
381	1	66	2	3	3	2	2	2	3	1	2	1	1	0	0	0	0	0	0	0	0	1	1	1	1	1	1	2	2	10
382	1	66	1	3	2	2	1	1	2	2	2	0	1	0	0	0	0	0	0	0	0	0	0	1	0	0	0	0	1	2
383	1	66	1	3	1	1	1	2	3	2	2	0	1	0	0	0	0	0	0	0	0	1	1	1	0	1	0	1	1	6
384	1	66	2	3	3	1	1	2	2	1	1	0	0	0	0	0	0	0	0	0	1	0	0	1	1	0	0	0	1	3
385	1	66	1	5	1	1	1	1	2	2	2	0	1	0	0	0	0	1	0	0	0	2	0	0	0	1	1	2	1	7
386	0	66	1	3	1	1	1	1	3	2	2	0	0	1	0	0	0	0	0	0	0	3	2	3	2	2	2	2	1	17
387	1	66	2	3	2	1	2	1	2	1	2	0	1	0	0	0	0	0	0	0	0	0	0	0	1	1	0	1	1	4
388	0	66	1	3	1	1	1	1	2	2	2	0	1	1	0	0	0	0	0	0	0	99	1	1	1	1	0	0	1	104
389	0	66	1	3	1	1	1	1	2	2	2	0	1	1	0	0	0	0	0	0	0	0	0	0	1	1	1	1	2	6
390	1	66	1	3	2	2	2	1	2	2	2	0	1	0	0	1	0	0	0	0	0	0	1	1	0	1	0	1	1	5
391	0	66	1	5	1	1	2	2	2	1	2	1	0	0	0	1	0	0	1	0	0	0	0	0	0	0	0	0	1	1
392	1	66	1	3	1	1	2	2	2	1	2	0	1	0	0	0	0	1	0	0	0	1	1	0	1	1	0	1	1	6
393	1	66	1	3	1	1	2	1	2	1	3	1	0	0	0	0	0	0	0	0	0	0	0	0	0	0	0	0	1	1
394	1	66	1	3	2	1	2	1	2	2	2	0	1	0	0	0	0	0	0	0	0	1	1	1	2	1	1	1	2	10
395	0	66	1	3	2	2	1	1	3	2	2	0	1	0	0	0	0	0	0	0	0	1	0	0	1	1	1	1	1	6
396	1	66	2	3	2	1	1	1	2	1	2	1	0	0	0	0	0	0	0	0	0	0	0	0	0	0	0	0	0	0
397	0	66	1	3	1	1	1	1	2	2	2	0	1	0	0	0	0	0	0	0	0	0	0	0	0	0	1	1	1	3
398	0	66	1	5	1	1	2	1	2	2	2	0	1	0	0	0	0	0	0	0	0	1	0	0	0	1	0	2	2	6
399	1	66	1	5	3	2	2	1	2	2	2	0	1	0	0	0	0	0	0	0	0	0	0	1	1	1	1	1	1	6
400	0	66	1	3	1	2	1	1	1	2	2	0	1	0	0	1	0	0	0	0	0	0	0	0	1	1	0	1	0	3
401	0	66	1	3	1	1	1	1	2	1	2	1	0	0	0	0	0	0	0	0	0	1	2	2	0	2	0	2	1	10
402	1	66	1	3	6	1	1	1	2	2	1	0	1	0	0	0	0	0	0	0	0	0	0	1	0	0	0	0	1	2
403	0	66	1	3	1	2	1	1	2	2	2	0	1	1	0	0	0	0	0	0	0	0	0	1	0	0	0	0	1	2
404	0	66	1	3	1	1	1	1	2	2	2	0	0	1	0	0	0	0	0	0	0	1	0	0	0	1	0	1	1	4
405	1	66	1	3	1	1	1	1	2	2	1	0	1	1	1	0	0	1	0	0	0	1	0	1	0	0	0	1	0	3
406	0	66	2	5	3	2	1	2	2	1	2	0	1	1	0	0	0	0	0	0	0	0	1	0	0	1	1	3	2	8
407	1	66	1	3	3	2	2	1	2	2	1	0	1	0	0	0	0	0	0	0	0	1	0	1	1	0	0	0	1	4
408	1	66	1	3	2	2	1	1	2	2	1	0	1	0	0	0	0	0	0	0	0	0	0	0	0	0	0	0	1	1
409	1	66	2	3	2	2	2	2	3	1	2	0	0	1	0	0	0	0	0	0	0	2	2	2	2	2	0	0	1	11
410	0	66	2	5	1	1	1	1	1	1	2	0	1	1	0	0	0	0	0	0	0	0	1	2	1	1	1	0	1	7
411	1	66	1	3	1	1	2	1	2	2	2	0	1	0	0	0	0	0	0	0	0	0	0	1	0	0	0	0	1	2
412	0	66	1	3	2	2	1	2	2	2	2	0	1	0	0	0	0	0	0	0	0	2	0	0	1	1	0	0	1	5
413	1	66	1	3	1	1	1	1	2	2	2	0	1	0	0	0	0	0	0	0	0	0	0	0	0	0	0	0	2	2
414	1	66	1	3	1	1	99	1	3	99	2	0	0	0	0	1	0	0	0	0	0	0	1	0	2	1	0	0	1	5
415	0	66	1	3	1	2	1	2	2	2	2	0	1	0	1	0	0	0	0	0	1	0	0	0	1	1	0	1	1	4
416	1	66	1	3	4	2	99	1	3	99	1	0	1	0	0	0	0	0	0	0	0	1	1	1	1	1	1	2	1	9
417	1	66	1	3	1	1	1	1	99	2	1	0	1	1	1	0	0	1	0	0	0	0	0	1	0	1	0	0	99	101
418	0	66	1	3	1	1	2	1	2	2	2	0	1	1	0	0	0	0	0	0	0	0	0	1	1	1	0	0	1	4
419	0	66	1	3	1	1	2	1	2	2	2	0	1	0	0	0	0	0	0	0	0	0	0	0	0	0	0	0	1	1
420	0	66	1	3	1	1	1	1	3	1	2	0	0	0	0	0	0	1	0	0	0	2	2	2	1	1	3	3	1	15
421	0	66	2	3	2	2	2	1	2	1	2	0	1	0	0	1	0	0	0	0	0	1	0	0	0	1	0	0	0	2
422	0	66	1	3	1	1	1	2	2	2	1	0	1	1	0	0	0	0	0	0	0	1	1	2	1	1	0	0	1	7
423	0	66	2	3	1	2	1	1	3	1	2	0	0	1	1	0	0	0	0	0	0	2	1	2	1	1	1	99	1	108
424	1	66	1	3	1	1	1	1	2	2	2	0	1	0	0	0	0	0	0	0	0	0	1	1	0	0	0	0	1	3
425	1	66	1	3	1	1	1	1	2	1	1	0	1	1	0	0	0	0	0	0	0	0	1	1	0	1	1	1	1	6
426	1	66	2	3	2	1	2	2	2	1	2	0	1	1	0	0	0	0	0	0	0	1	0	0	1	1	1	1	1	6
427	1	66	1	3	1	1	2	1	2	2	2	0	1	0	0	0	0	0	0	0	0	1	1	1	1	1	0	1	1	7
428	1	66	1	3	1	1	1	1	2	2	3	0	1	0	0	1	0	0	0	0	0	0	0	0	1	1	0	0	1	3
429	1	66	2	3	3	2	2	1	3	1	1	1	0	0	0	0	0	0	0	0	0	3	1	1	1	1	1	1	1	10
430	0	66	1	3	1	1	1	1	2	2	2	0	0	1	0	0	0	0	0	0	0	1	0	0	0	0	1	2	2	6
431	0	66	1	3	2	3	1	1	2	2	2	0	1	0	0	0	0	0	0	0	0	0	0	0	0	0	0	0	0	0
432	0	66	1	3	1	1	2	1	2	2	2	0	1	0	0	0	0	1	1	0	0	1	1	1	1	1	1	2	1	9
433	1	66	1	1	1	1	1	1	2	2	1	0	1	0	0	0	0	0	0	0	0	0	0	0	0	0	0	0	0	0
434	1	66	2	5	3	2	2	2	2	1	2	1	0	0	0	0	0	0	0	0	0	1	1	1	1	1	0	1	2	8
435	1	66	2	3	2	2	1	1	2	1	3	0	0	1	0	0	0	0	0	0	0	0	0	0	0	0	0	0	0	0
436	1	66	1	1	1	1	1	1	3	2	2	0	1	0	0	0	0	1	0	0	0	0	0	0	0	1	0	2	1	4
437	1	66	1	3	1	1	1	1	2	2	2	0	1	0	0	0	0	0	0	0	0	1	1	0	0	0	0	0	1	3
438	0	66	99	5	99	99	99	99	99	99	99	99	99	99	99	99	99	99	99	99	99	99	99	99	99	99	99	99	99	792
439	1	67	1	3	1	2	2	1	2	2	3	0	1	0	0	0	0	0	0	0	0	0	1	2	1	1	0	0	1	6
440	0	67	1	3	6	1	1	1	2	2	2	0	1	0	0	0	0	0	0	0	0	0	0	0	1	0	0	0	1	2
441	1	67	1	3	2	2	2	1	2	2	2	0	1	0	0	0	0	0	0	0	0	0	0	0	0	0	0	0	0	0
442	0	67	99	3	3	99	1	1	2	1	2	0	0	1	0	1	0	0	0	0	0	1	0	1	1	1	0	0	0	4
443	1	67	1	3	1	1	2	1	2	2	2	0	1	0	0	0	0	0	0	0	0	0	0	0	0	1	0	0	1	2
444	0	67	1	3	1	1	1	1	2	2	1	0	1	1	0	0	0	0	0	0	0	0	0	2	0	0	0	0	1	3
445	1	67	2	3	1	1	1	1	2	2	2	0	0	1	0	0	0	0	0	0	0	0	0	1	1	1	1	1	2	7
446	0	67	1	3	3	2	99	1	3	2	1	0	1	1	0	0	0	0	0	0	0	2	1	1	1	1	1	2	1	10
447	1	67	1	3	1	1	1	1	2	2	1	0	1	0	0	0	0	0	0	0	0	0	0	0	1	1	0	0	0	2
448	1	67	1	3	1	1	2	1	2	2	2	0	0	1	0	0	0	0	0	0	0	0	0	1	1	1	99	1	1	104
449	0	67	1	3	2	2	2	2	3	2	2	0	1	1	0	0	0	0	0	0	0	2	1	1	1	1	1	1	2	10
450	0	67	1	3	4	1	1	1	2	2	2	0	1	1	0	0	0	0	0	0	0	0	0	1	0	0	0	0	1	2
451	0	67	1	3	1	1	1	1	2	2	1	0	1	1	0	0	0	1	0	0	0	0	0	0	0	1	0	0	1	2
452	0	67	1	3	1	1	1	1	2	2	2	0	1	0	0	0	0	0	0	0	0	0	0	1	0	0	0	0	1	2
453	1	67	1	3	1	1	1	1	2	2	1	0	1	0	0	0	0	0	0	0	0	0	0	0	0	0	0	0	1	1
454	0	67	1	3	1	1	1	1	2	2	2	0	1	1	0	0	0	0	0	0	0	0	0	1	0	0	0	0	1	2
455	0	67	1	3	1	1	1	1	2	2	1	0	1	1	0	0	0	0	0	0	0	0	0	0	0	0	0	0	1	1
456	1	67	1	3	3	1	1	1	2	2	2	0	1	0	0	0	0	0	0	0	0	1	0	1	0	0	0	1	1	4
457	1	67	1	3	1	1	2	1	3	2	2	0	1	0	0	0	0	0	0	0	0	1	1	1	1	1	1	2	1	9
458	1	67	1	3	1	1	2	1	2	2	3	0	1	0	0	0	0	0	0	0	0	2	0	1	1	1	0	0	0	5
459	0	67	1	3	1	1	1	1	2	1	99	99	99	99	99	99	99	99	99	99	99	1	1	2	0	0	99	99	99	301
460	0	67	2	3	2	2	2	1	2	1	2	0	1	0	0	0	0	0	0	0	0	1	0	0	1	1	0	1	1	5
461	0	67	1	1	1	1	1	1	2	2	2	1	0	0	0	0	0	0	0	0	0	0	0	0	0	1	0	1	1	3
462	1	67	1	3	1	1	1	1	2	2	1	0	1	0	0	0	0	0	0	0	0	0	0	0	0	0	0	0	0	0
463	1	67	1	3	1	1	2	1	2	2	2	0	0	0	0	1	1	0	0	0	0	1	0	1	1	0	0	0	1	4
464	0	67	1	3	1	1	1	1	2	2	2	0	1	0	0	0	0	0	0	0	0	1	1	2	1	1	0	0	1	7
465	1	67	1	3	1	2	1	2	2	2	1	0	1	1	1	1	0	0	0	0	0	0	0	0	1	1	0	0	1	3
466	1	67	1	3	1	1	1	1	3	2	3	0	1	0	0	0	0	0	0	0	0	0	0	0	0	0	0	99	1	100
467	0	67	1	3	1	1	1	1	2	2	2	0	1	1	0	1	0	0	0	0	0	0	0	1	1	1	0	0	1	4
468	0	67	1	3	1	1	1	1	2	2	2	0	1	0	0	0	0	0	0	0	0	3	1	2	2	2	1	1	1	13
469	0	67	1	3	3	2	99	1	3	99	2	0	1	1	0	0	0	0	0	0	0	0	0	0	0	0	0	0	1	1
470	0	67	1	3	1	1	1	1	3	2	2	0	0	1	0	0	0	0	0	0	0	1	1	1	1	1	1	1	1	8
471	0	67	1	3	2	2	2	2	3	2	2	0	1	0	0	0	0	0	0	0	0	0	1	0	0	0	1	1	1	4
472	0	67	1	3	2	2	1	1	2	2	2	0	1	0	0	0	0	0	0	0	0	0	0	0	0	0	0	0	0	0
473	0	67	2	3	1	1	1	1	3	1	2	0	0	0	0	0	0	0	0	0	1	2	2	2	1	2	1	1	2	13
474	0	67	1	3	1	1	99	1	2	99	3	0	0	1	0	1	0	0	0	0	0	1	0	0	0	1	1	1	0	4
475	1	67	1	3	1	1	2	1	2	2	2	0	1	0	0	0	0	0	0	0	0	0	0	0	0	0	0	0	0	0
476	0	67	1	1	1	1	1	1	2	2	1	0	0	1	0	0	0	0	0	0	0	1	0	1	0	1	0	0	1	4
477	1	67	1	3	1	1	1	1	2	2	2	0	1	0	0	0	0	0	0	0	0	0	0	0	0	1	0	0	1	2
478	1	67	1	3	1	1	1	1	2	2	2	1	0	0	0	0	0	0	0	0	0	1	0	1	0	0	0	0	1	3
479	0	67	1	3	1	1	1	1	2	2	2	0	1	1	0	0	0	0	0	0	0	1	0	0	0	0	0	1	1	3
480	0	67	1	3	1	1	1	1	2	1	3	0	0	0	0	1	0	0	0	0	0	1	1	1	1	1	0	0	1	6
481	1	67	2	1	4	2	1	1	2	1	2	0	0	1	0	0	0	0	0	0	0	0	1	2	0	2	1	2	2	10
482	1	67	1	3	1	1	1	1	2	2	1	0	1	0	0	0	0	0	0	0	0	0	0	0	0	0	0	0	1	1
483	1	67	1	3	1	1	2	1	2	2	1	0	1	0	0	0	0	0	0	0	0	0	0	0	0	0	0	0	1	1
484	0	67	1	3	1	1	1	1	2	2	1	0	1	0	1	0	0	0	0	0	0	1	1	0	1	1	1	1	1	7
485	0	67	1	3	1	1	1	1	2	2	2	0	1	0	0	0	0	0	0	0	0	0	0	0	0	0	0	0	1	1
486	0	67	2	3	2	3	1	1	2	1	3	0	1	1	0	0	0	0	0	0	0	0	0	0	0	0	0	0	1	1
487	0	67	2	3	3	2	2	2	3	1	2	0	1	0	0	0	0	0	0	0	0	2	0	1	1	1	1	1	1	8
488	0	67	2	3	5	2	1	1	2	3	2	0	0	1	0	0	0	0	1	0	0	1	1	1	1	1	0	0	1	6
489	1	67	2	3	2	1	1	1	2	1	2	0	1	1	0	0	0	0	0	0	0	0	0	1	0	0	0	0	1	2
490	1	67	2	3	3	2	2	2	2	1	3	1	0	0	0	0	0	0	0	0	0	2	2	1	2	2	1	1	1	12
491	1	67	1	1	4	2	1	1	2	2	2	0	1	0	0	0	0	0	0	0	0	1	2	0	1	1	0	0	1	6
492	0	67	1	3	2	2	1	2	2	2	2	0	0	1	0	0	0	0	0	0	0	1	1	1	1	1	1	1	1	8
493	0	67	2	3	1	1	1	2	3	1	1	0	1	1	0	0	0	0	0	0	0	1	0	0	0	0	0	1	99	101
494	1	67	2	3	2	2	1	1	2	1	3	0	0	1	0	0	0	0	0	0	0	2	2	2	1	1	1	1	1	11
495	1	67	2	3	1	1	1	1	2	1	2	0	1	1	0	0	0	0	0	0	0	0	0	1	0	0	0	1	1	3
496	1	67	2	3	2	3	1	1	2	3	2	0	0	1	0	0	0	0	0	0	0	1	0	0	1	1	0	0	1	4
497	0	67	2	3	3	2	1	2	2	1	1	0	1	0	0	1	0	0	0	0	0	0	0	0	0	0	0	0	1	1
498	1	67	1	5	1	1	1	1	2	2	1	0	1	0	0	0	0	0	0	0	0	0	0	1	1	0	0	0	1	3
499	0	67	1	3	1	1	2	1	2	2	99	0	1	0	0	0	0	0	0	0	0	99	1	1	0	1	0	0	1	103
500	1	67	1	3	1	1	1	1	2	2	1	0	1	1	0	0	0	0	0	0	0	1	1	1	1	1	0	1	1	7
501	0	67	1	3	1	1	1	1	2	2	2	0	1	1	0	1	0	0	0	0	0	0	0	1	1	2	1	1	1	7
502	1	67	1	3	3	2	1	1	2	2	2	0	1	0	0	0	0	0	0	0	0	1	0	2	1	1	1	0	1	7
503	0	67	1	3	3	2	1	1	2	2	2	0	1	1	0	0	0	0	0	0	0	1	1	1	0	0	1	1	1	6
504	0	67	1	3	1	1	2	1	2	2	2	0	1	1	0	0	0	0	0	0	0	1	0	1	1	1	0	1	1	6
505	0	67	1	3	1	1	1	1	2	2	1	0	1	1	0	0	0	0	0	0	0	1	1	1	1	1	0	0	1	6
506	0	67	1	3	1	1	1	1	2	1	2	0	0	0	0	0	0	0	0	0	1	0	0	0	1	1	1	1	1	5
507	0	67	2	3	1	1	1	1	2	1	2	0	1	1	1	1	0	0	0	0	0	1	0	1	0	0	0	0	1	3
508	1	67	1	3	2	2	1	1	2	2	2	0	1	1	0	0	0	0	0	0	0	0	0	0	0	0	0	0	0	0
509	0	67	99	3	4	99	2	2	2	1	3	0	0	1	0	0	0	0	0	0	0	1	0	0	1	1	0	1	2	6
510	0	67	1	3	1	1	1	1	2	1	2	0	0	1	0	0	0	0	0	0	0	0	1	2	1	1	1	1	1	8
511	0	67	1	3	2	2	1	1	2	2	2	0	1	1	0	0	0	0	0	0	0	2	2	2	1	2	1	0	1	11
512	1	67	1	3	2	2	1	1	2	2	3	0	1	0	0	0	0	0	0	0	0	0	0	1	1	1	0	1	1	5
513	0	67	1	3	2	2	1	1	2	2	99	0	1	1	0	0	0	0	0	0	0	1	0	1	1	1	0	0	1	5
514	0	67	2	3	3	2	1	2	2	1	1	0	1	1	1	0	0	1	0	0	0	3	2	3	2	2	0	3	1	16
515	0	67	2	3	1	1	2	1	3	1	2	0	1	1	0	0	0	0	0	0	0	1	1	1	1	1	99	1	0	105
516	0	67	1	3	1	1	1	1	2	2	2	0	1	1	0	0	0	1	0	0	0	0	0	1	0	0	1	0	1	3
517	1	67	2	3	2	2	2	1	2	1	2	0	0	0	0	0	0	1	0	0	0	0	0	0	0	0	0	3	2	5
518	1	67	1	3	1	2	2	1	3	2	3	0	0	1	0	0	0	0	0	0	0	0	0	1	0	0	1	1	1	4
519	1	67	1	3	3	2	1	1	2	2	3	0	1	0	0	0	0	0	0	0	0	1	1	1	0	1	0	0	1	5
520	1	67	2	3	3	2	1	1	2	1	1	0	1	1	0	0	0	0	0	0	0	0	0	1	0	1	0	0	1	3
521	1	67	2	3	3	1	1	1	1	1	1	0	1	0	0	0	0	0	0	0	0	2	0	1	1	1	0	1	2	8
522	1	67	1	3	1	1	1	2	2	1	2	0	0	1	0	0	0	0	0	0	0	2	0	1	0	1	0	0	0	4
523	0	67	2	3	3	2	2	1	2	1	1	0	1	1	0	0	0	0	0	0	0	0	0	0	1	0	0	0	2	3
524	1	67	2	3	2	2	1	1	2	1	3	0	1	1	0	0	0	1	0	0	0	0	1	1	0	0	0	0	1	3
525	0	67	1	3	1	1	1	1	2	2	1	0	1	1	0	0	0	0	0	0	0	0	0	1	0	0	0	0	1	2
526	0	67	1	3	1	1	1	1	2	2	1	0	0	1	0	0	0	0	0	0	0	0	0	0	0	0	0	0	1	1
527	1	67	1	3	1	2	1	1	2	2	2	0	1	0	0	0	0	0	0	0	0	0	0	0	0	1	0	0	1	2
528	0	67	1	3	1	1	1	1	2	2	2	0	1	1	0	0	0	0	0	0	0	3	2	0	1	1	0	0	1	8
529	0	67	1	3	1	1	1	1	2	2	1	0	1	0	0	0	0	0	0	0	0	2	2	2	1	2	0	0	1	10
530	1	67	1	3	1	1	1	2	2	2	2	0	1	0	0	0	0	0	0	0	0	0	0	1	0	0	0	0	0	1
531	0	67	1	3	2	1	2	2	3	2	2	0	1	0	0	0	0	0	0	0	0	0	1	3	1	1	0	0	1	7
532	0	67	1	3	1	1	1	1	2	2	2	0	1	0	0	0	0	0	0	0	0	0	1	0	1	1	0	0	1	4
533	1	67	1	3	1	1	1	1	2	2	1	0	1	0	0	0	0	0	0	0	0	0	0	0	0	0	0	0	0	0
534	1	67	1	3	1	1	1	1	2	2	2	0	1	1	1	0	0	0	0	0	0	1	0	0	1	0	0	1	1	4
535	1	67	1	3	99	1	1	1	2	2	99	99	99	99	99	99	99	99	99	99	99	1	1	1	1	1	99	99	99	302
536	0	67	1	3	6	1	1	1	2	2	2	0	1	0	0	0	0	0	0	0	0	2	1	2	1	1	1	1	1	10
537	0	67	1	1	1	1	1	1	2	2	2	0	1	0	0	0	0	0	0	0	0	0	0	0	0	0	1	1	1	3
538	1	67	1	3	1	2	1	1	2	2	1	0	0	1	1	1	0	1	0	0	0	1	0	1	1	1	1	1	1	7
539	0	67	1	3	1	1	1	1	2	2	2	0	1	1	0	0	0	0	0	0	0	1	2	1	2	2	1	2	2	13
540	0	67	2	3	3	3	1	1	3	1	3	1	0	0	0	0	0	0	0	0	0	2	2	2	2	2	2	2	1	15
541	1	67	2	3	2	2	2	1	3	1	2	0	0	1	0	0	1	0	1	1	0	1	0	1	1	1	1	1	1	7
542	1	67	1	3	1	1	1	1	2	2	2	0	1	1	0	0	0	0	0	0	0	0	0	0	0	0	0	0	1	1
543	1	67	1	3	1	1	1	1	2	2	1	0	1	0	0	0	0	0	0	0	0	0	0	1	0	0	0	0	1	2
544	0	67	1	3	1	1	1	2	3	2	1	0	1	0	0	0	0	0	0	0	0	0	0	0	1	1	0	1	0	3
545	1	67	1	3	1	1	1	1	2	2	2	0	1	0	0	1	0	0	0	0	0	0	0	1	1	1	0	0	1	4
546	1	67	1	5	1	1	1	1	2	1	2	0	0	0	0	1	0	1	0	0	0	0	0	1	0	1	1	1	1	5
547	0	67	1	3	1	1	1	1	2	2	1	0	1	1	0	0	0	0	0	0	0	1	1	1	1	1	1	1	1	8
548	1	67	1	3	1	1	1	1	2	2	1	0	1	0	0	0	0	0	0	0	0	0	0	0	1	1	0	0	1	3
549	1	67	1	3	1	1	1	1	2	2	2	0	1	1	0	0	0	0	0	0	0	0	0	0	1	0	0	0	0	1
550	0	67	1	3	1	1	1	1	2	2	2	0	1	1	0	0	0	0	0	0	0	1	0	0	1	1	0	0	1	4
551	1	67	1	1	1	1	1	1	2	2	2	0	1	0	0	0	0	0	0	0	0	0	0	0	0	0	0	0	1	1
552	0	67	1	3	1	1	1	1	2	2	1	0	0	1	0	0	0	0	0	0	0	2	1	0	0	0	0	0	1	4
553	1	67	1	3	1	1	1	1	2	2	1	0	1	1	0	0	0	0	0	0	0	0	0	0	0	0	0	0	1	1
554	1	67	1	3	2	2	1	1	2	2	2	0	1	0	0	0	0	0	0	0	0	1	0	1	1	1	1	1	1	7
555	1	67	1	3	1	1	2	1	3	2	2	0	1	0	0	0	0	0	0	0	0	2	1	0	0	0	0	2	0	5
556	0	67	2	3	2	1	1	1	2	1	2	0	1	1	0	0	0	0	0	0	0	0	0	0	0	0	0	1	0	1
557	1	67	1	3	1	1	2	2	2	2	1	0	1	0	0	0	0	0	0	0	0	0	0	1	0	1	0	0	1	3
558	1	67	1	3	1	1	1	1	2	2	3	0	1	1	0	0	0	0	0	0	0	0	0	0	0	0	0	0	1	1
559	0	67	1	3	1	2	2	1	2	2	2	0	1	0	0	0	0	0	0	0	0	0	0	0	0	0	0	0	1	1
560	1	67	1	3	1	2	1	1	2	2	2	0	1	0	0	0	0	0	0	0	0	0	1	2	0	0	0	2	1	6
561	0	67	1	3	1	1	1	1	2	2	2	0	1	0	0	0	0	0	0	0	0	0	0	0	0	1	0	0	1	2
562	0	67	2	3	3	2	2	2	2	1	2	0	1	1	0	0	0	0	0	0	0	2	0	99	2	2	0	2	1	108
563	0	67	2	3	2	2	2	1	2	1	3	0	0	1	0	0	0	0	0	0	0	2	1	99	1	1	0	1	1	106
564	1	67	1	3	1	1	1	1	2	2	1	0	1	0	0	0	0	1	0	0	0	1	1	1	1	1	0	0	1	6
565	0	67	1	3	1	1	1	1	2	2	1	0	1	1	0	0	0	0	0	0	0	0	0	0	1	1	0	2	1	5
566	1	67	1	3	1	1	1	1	2	2	1	0	1	1	0	0	0	0	0	0	0	0	1	1	0	0	0	0	1	3
567	1	67	1	3	1	1	2	1	2	2	2	0	1	0	0	1	0	0	0	0	0	0	0	1	0	1	0	0	1	3
568	1	67	1	3	3	2	1	1	1	2	2	99	99	99	99	99	99	99	99	99	99	0	0	0	0	0	99	99	0	198
569	0	67	1	3	1	1	1	1	2	2	2	0	1	0	0	0	0	0	0	0	0	0	0	0	0	0	0	0	1	1
570	1	67	1	3	2	1	2	2	2	2	2	0	1	0	0	0	0	0	0	0	0	0	0	0	1	1	0	0	1	3
571	1	67	1	3	1	1	2	1	2	2	2	0	1	0	0	0	0	0	0	0	0	0	0	0	0	0	0	0	0	0
572	1	67	1	3	2	2	99	1	3	99	2	0	1	1	0	0	0	0	0	0	0	0	0	0	1	1	0	0	1	3
573	0	67	1	3	1	1	1	2	2	2	1	0	1	1	0	0	0	0	0	0	0	1	0	0	1	1	0	0	1	4
574	0	67	1	3	1	1	1	1	2	2	2	0	1	1	1	0	0	0	0	0	0	1	0	0	1	0	0	0	1	3
575	0	67	1	5	1	1	1	1	2	2	2	0	1	1	0	0	0	0	0	0	0	0	0	0	0	0	1	1	1	3
576	0	67	1	3	2	1	1	1	2	2	2	0	0	1	0	0	0	0	0	0	0	0	0	0	1	1	0	1	1	4
577	0	67	1	3	2	1	1	2	3	2	2	0	1	1	0	0	0	0	0	0	0	0	0	1	2	1	0	0	1	5
578	1	67	1	3	2	2	1	1	2	1	3	0	1	1	0	0	0	0	0	0	0	0	99	1	0	2	0	0	2	104
579	1	67	1	3	1	1	1	1	2	2	1	0	1	1	0	0	0	0	0	0	0	0	0	0	1	0	0	0	1	2
580	1	67	1	3	1	1	1	1	2	2	2	0	1	0	0	0	0	0	0	0	0	1	0	1	1	0	0	1	1	5
581	0	67	1	3	1	1	1	1	2	2	2	0	1	1	0	0	0	0	0	0	0	0	0	0	1	0	0	0	0	1
582	1	67	2	5	99	2	2	1	2	1	2	0	0	1	0	0	0	0	0	0	0	1	1	1	1	2	0	1	2	9
583	0	67	1	3	2	1	1	1	2	2	2	0	0	0	0	1	0	0	0	0	0	0	0	0	1	1	0	0	1	3
584	0	67	1	1	1	1	1	1	2	2	1	0	0	1	1	0	0	0	0	0	0	0	0	1	0	0	0	0	1	2
585	1	67	1	3	1	1	1	1	2	2	1	0	0	0	0	0	0	0	0	0	1	0	1	1	1	1	0	0	0	4
586	0	67	1	3	1	1	1	1	2	2	1	0	1	1	0	0	0	0	0	0	0	0	0	0	0	0	0	0	1	1
587	1	67	1	3	1	1	1	1	2	2	2	0	1	1	0	0	0	0	0	0	0	0	1	2	1	1	1	1	1	8
588	1	67	2	3	2	2	1	2	3	1	2	0	0	1	0	1	0	0	0	0	0	1	1	1	1	1	0	0	2	7
589	1	67	1	3	1	1	1	1	3	2	2	0	1	0	0	0	0	0	0	0	0	1	2	2	2	2	2	2	1	14
590	1	67	1	3	1	1	2	1	2	2	3	0	1	0	0	0	0	0	0	0	0	0	1	2	1	1	0	3	2	10
591	1	67	1	3	2	99	2	1	2	2	2	0	1	0	1	0	0	0	0	0	0	0	0	1	0	0	0	2	1	4
592	1	67	1	3	1	1	2	1	2	2	3	0	1	1	0	0	0	0	0	0	0	0	0	1	0	0	0	0	0	1
593	0	67	1	5	1	1	2	2	2	2	2	0	1	0	0	0	0	0	0	0	0	3	0	0	1	1	0	0	1	6
594	0	67	2	1	3	2	1	2	2	1	2	0	0	1	0	0	0	0	0	0	0	1	0	1	1	1	0	0	0	4
595	1	67	1	3	1	1	2	1	3	2	3	1	0	0	0	0	0	0	0	0	0	2	0	0	0	0	0	1	1	4
596	0	67	1	3	2	99	99	2	3	2	2	0	1	1	0	0	0	0	0	0	0	1	1	0	1	1	0	1	1	6
597	0	67	1	3	1	1	1	1	2	2	2	0	1	0	0	0	0	0	0	0	0	0	0	0	0	0	0	0	0	0
598	0	67	1	3	2	2	1	1	2	2	2	0	1	0	0	0	0	0	1	0	0	0	0	1	1	0	0	0	1	3
599	0	67	1	3	1	1	1	1	2	2	2	0	1	1	0	0	0	0	0	0	0	1	1	0	0	1	0	0	1	4
600	1	67	1	1	1	1	1	1	2	2	1	0	1	0	0	0	0	0	0	0	0	0	0	0	1	1	0	0	1	3
601	0	67	1	3	1	1	1	1	3	2	2	0	1	0	0	0	0	0	0	0	0	0	0	0	0	0	0	1	1	2
602	0	67	1	5	1	1	1	1	2	2	1	0	1	1	0	0	0	0	0	0	0	2	1	1	1	2	1	0	1	9
603	0	67	2	5	3	2	2	1	2	1	1	0	0	1	0	1	0	0	0	0	0	0	0	1	1	1	0	0	1	4
604	1	67	2	5	3	2	2	2	3	1	2	0	1	0	0	0	0	0	0	0	0	3	1	2	2	2	1	1	1	13
605	0	67	2	3	1	1	1	2	3	2	2	0	1	1	0	0	0	0	0	0	0	1	1	1	1	1	1	1	1	8
606	0	67	1	3	1	1	1	1	2	2	2	0	1	1	0	0	0	0	0	0	0	0	0	1	0	0	0	0	1	2
607	1	67	1	5	1	1	1	1	2	2	2	0	1	1	0	0	0	0	0	0	0	0	2	2	2	2	0	0	2	10
608	0	67	1	3	1	1	1	1	2	2	1	0	1	0	0	0	0	0	0	0	0	0	0	0	0	0	0	0	0	0
609	0	67	1	3	1	2	1	1	2	2	2	0	1	0	0	0	0	0	0	0	0	0	0	1	0	0	0	0	1	2
610	0	67	1	1	1	1	1	1	2	2	2	0	1	1	0	0	0	0	0	0	0	1	0	0	0	1	0	0	1	3
611	0	67	2	3	2	3	1	1	2	1	2	0	0	1	0	0	0	0	0	0	0	1	0	1	0	0	0	1	1	4
612	1	67	2	3	2	3	1	2	3	1	2	0	0	1	0	1	0	0	0	0	0	1	0	0	1	1	1	1	1	6
613	0	67	1	5	1	1	1	1	2	2	2	0	1	1	0	0	0	0	0	0	0	0	0	0	0	0	0	0	1	1
614	1	67	1	3	2	1	1	1	2	2	2	0	1	0	0	0	0	0	0	0	0	1	0	0	1	99	0	0	0	101
615	1	67	1	3	1	1	1	1	2	2	1	0	1	0	0	0	0	0	0	0	0	0	0	0	0	0	0	0	1	1
616	0	67	2	3	2	1	1	1	2	3	2	0	1	0	0	0	0	0	0	0	0	0	0	0	0	0	0	0	0	0
617	0	67	2	3	3	2	1	2	3	1	3	1	0	0	0	0	0	0	0	0	0	3	3	3	3	0	0	3	1	16
618	1	67	2	3	3	2	2	2	3	1	2	0	1	1	0	0	0	0	0	0	0	0	0	0	0	1	0	1	0	2
619	1	67	1	3	1	1	1	1	2	2	2	0	1	0	0	0	0	0	0	0	0	0	0	0	0	0	0	0	1	1
620	1	67	1	3	1	1	1	2	2	1	3	0	1	0	0	1	0	0	0	0	0	1	1	1	1	1	1	1	1	8
621	0	67	1	3	1	2	1	1	2	2	2	0	1	0	0	0	0	0	0	0	0	0	0	1	0	0	1	2	1	5
622	1	67	1	3	1	2	2	1	2	2	2	0	1	0	0	0	0	0	0	0	0	1	0	0	1	1	0	0	2	5
623	0	67	1	3	1	1	1	1	2	2	1	0	1	1	0	0	0	0	0	0	0	99	99	99	1	0	0	1	1	300
624	0	67	1	3	1	1	1	1	3	2	2	0	1	1	0	0	0	0	0	0	0	1	1	1	1	2	0	1	2	9
625	0	67	1	3	1	2	1	2	2	1	3	0	1	0	0	0	0	0	0	0	0	1	1	1	1	1	0	1	1	7
626	0	67	1	3	1	1	1	1	3	2	2	0	1	0	0	0	0	0	0	0	0	1	0	0	1	2	1	1	1	7
627	0	67	1	3	1	1	1	1	2	2	2	0	1	0	0	0	0	1	0	0	0	0	1	1	1	2	0	2	2	9
628	1	67	1	3	1	1	2	1	3	2	1	0	1	0	0	0	0	0	0	0	0	0	0	0	0	0	0	2	0	2
629	1	67	1	3	1	1	2	1	2	2	2	1	0	0	0	0	0	0	0	0	0	0	0	0	0	0	0	0	0	0
630	0	67	1	3	3	1	1	2	3	2	1	0	1	1	0	0	0	0	0	0	0	1	1	0	0	1	1	1	0	5
631	0	67	1	3	6	2	1	1	2	2	2	0	1	0	0	0	0	0	0	0	0	1	0	2	1	1	1	1	1	8
632	0	67	1	3	1	1	1	2	3	2	2	0	1	1	1	0	0	0	0	0	0	0	1	2	1	1	1	2	1	9
633	1	67	99	3	1	1	2	1	3	3	2	0	0	1	0	1	0	0	0	0	0	2	0	1	1	2	1	1	0	8
634	1	67	1	3	1	1	2	1	2	2	1	0	1	1	0	0	0	0	0	0	0	0	0	0	0	0	0	1	0	1
635	0	67	2	3	6	2	1	1	2	1	1	0	0	1	0	0	0	0	0	0	0	1	2	1	2	2	2	3	2	15
636	0	67	1	3	2	2	1	2	3	1	2	0	0	1	0	0	0	0	0	0	0	2	0	1	1	1	0	0	1	6
637	1	67	1	1	1	1	99	1	2	99	1	0	1	0	0	0	0	0	0	0	0	0	0	0	0	0	0	0	0	0
638	0	67	1	5	3	2	1	1	2	2	2	0	1	1	0	0	0	0	0	0	0	2	1	1	1	1	0	0	1	7
639	1	67	2	3	2	1	2	1	2	1	2	0	1	0	0	0	0	0	0	0	0	1	0	1	1	1	0	0	0	4
640	1	67	1	1	6	2	99	1	2	99	99	99	99	99	99	99	99	99	99	99	99	0	0	1	0	0	1	1	1	4
641	1	67	1	1	1	1	1	1	2	2	1	0	1	0	0	0	0	0	0	0	0	0	0	1	0	0	0	0	1	2
642	1	67	1	3	2	2	1	2	3	2	3	0	1	0	0	0	0	0	0	0	0	3	2	3	3	3	3	3	1	21
643	0	67	1	3	1	1	2	1	2	1	2	0	0	1	0	0	0	0	0	0	0	0	0	0	1	1	1	1	0	4
644	1	67	1	3	3	2	1	2	2	2	1	0	1	0	0	0	0	0	0	0	0	1	1	1	1	1	1	1	1	8
645	1	67	1	3	1	1	1	1	2	2	1	0	1	1	0	0	0	0	0	0	0	1	1	1	1	1	0	0	1	6
646	1	67	1	3	1	2	1	1	2	2	1	0	0	1	0	0	0	0	0	0	0	0	1	99	0	1	0	1	1	103
647	1	67	1	3	1	2	1	1	2	2	2	0	1	0	0	0	0	0	0	0	0	1	0	1	1	1	0	1	1	6
648	1	67	1	1	1	1	1	1	2	2	1	0	1	0	0	0	0	0	0	0	0	0	0	1	0	1	1	0	1	4
649	1	67	1	5	2	2	99	99	99	2	2	1	0	0	0	0	0	0	0	0	0	99	99	99	99	99	1	2	1	499
650	0	67	2	3	2	1	1	1	2	2	3	0	1	0	0	0	0	0	0	0	0	1	1	0	0	1	0	0	1	4
651	0	68	1	1	3	1	1	1	3	2	1	0	0	1	0	0	0	0	0	0	0	1	1	0	1	1	1	1	1	7
652	0	68	1	3	2	2	1	1	2	2	2	0	1	0	0	0	0	0	0	0	0	1	1	1	1	2	1	2	1	10
653	1	68	1	3	2	1	1	1	3	2	2	0	1	0	0	0	0	0	0	0	0	1	1	1	0	1	0	1	1	6
654	0	68	1	3	1	1	1	1	2	2	1	0	1	1	1	0	0	1	0	0	0	0	0	0	1	0	0	0	1	2
655	1	68	1	3	2	2	2	1	2	2	2	0	1	0	0	0	0	0	0	0	0	0	1	0	1	1	0	0	1	4
656	1	68	1	3	1	1	1	1	2	1	2	1	0	0	0	0	0	0	0	0	0	0	0	0	1	1	0	0	2	4
657	1	68	1	3	1	1	99	1	3	99	3	0	1	0	0	0	0	0	0	0	0	1	1	2	1	1	0	1	1	8
658	0	68	1	3	1	1	1	1	2	2	2	0	1	1	0	0	0	0	0	0	0	0	0	0	0	0	0	0	1	1
659	0	68	1	3	1	1	1	2	2	2	2	0	1	0	0	0	0	0	0	0	0	1	0	1	0	0	0	0	1	3
660	1	68	1	3	1	1	1	1	2	2	2	0	1	0	0	0	0	0	0	0	0	1	0	0	0	0	0	0	1	2
661	0	68	1	3	1	1	1	1	2	2	1	0	1	0	0	0	0	0	0	0	0	0	0	0	0	0	0	0	1	1
662	1	68	1	3	1	1	1	1	2	2	1	0	1	1	0	0	0	0	0	0	0	0	0	1	0	0	0	1	1	3
663	1	68	1	3	1	2	2	1	2	2	2	1	0	0	0	0	0	0	0	0	0	0	0	2	1	1	0	0	1	5
664	0	68	1	3	1	1	1	1	2	2	2	0	1	1	1	0	0	0	0	0	1	1	0	1	1	0	0	0	1	4
665	0	68	1	3	1	1	1	1	2	2	1	0	1	1	0	0	0	1	0	0	0	0	0	0	0	0	0	0	0	0
666	1	68	1	3	1	1	1	1	2	2	2	0	1	0	0	0	0	0	0	0	0	0	0	0	0	0	0	0	1	1
667	0	68	1	3	6	1	1	1	3	2	1	0	1	0	0	0	0	0	0	0	0	1	1	0	1	1	0	0	1	5
668	1	68	1	3	1	1	1	1	2	2	2	0	1	1	0	0	0	0	0	0	0	0	0	0	1	1	0	0	1	3
669	1	68	2	1	99	1	1	1	2	2	1	0	1	0	0	0	0	0	0	0	0	0	0	0	0	0	0	0	0	0
670	0	68	1	3	1	1	1	1	2	2	2	0	1	1	0	0	0	0	0	0	0	0	0	0	0	0	0	0	1	1
671	1	68	1	3	2	2	1	1	2	1	3	0	1	0	0	0	0	0	0	0	0	1	1	0	0	1	2	2	1	8
672	0	68	1	3	1	1	1	1	2	2	2	0	1	0	0	0	0	0	0	0	0	3	2	2	3	2	99	99	2	212
673	0	68	1	3	1	1	1	1	2	2	1	0	1	1	0	0	0	1	0	0	0	0	0	0	1	0	0	0	0	1
674	0	68	1	3	1	1	1	1	2	2	2	0	1	1	0	0	0	0	0	0	0	0	0	1	1	1	1	1	1	6
675	0	68	2	3	2	2	1	1	2	1	2	0	1	1	0	0	0	0	0	0	0	2	1	1	1	1	2	2	1	11
676	0	68	1	3	3	2	1	2	2	2	2	0	1	0	0	0	0	0	0	0	0	1	1	1	1	1	1	1	1	8
677	1	68	1	3	2	1	1	1	3	2	2	0	0	0	0	0	0	0	0	0	1	1	0	1	0	0	0	1	2	5
678	0	68	2	3	1	1	1	1	2	1	2	0	1	0	0	0	0	0	0	0	0	1	0	0	1	1	0	0	1	4
679	0	68	1	3	1	1	1	1	2	2	2	0	1	0	0	0	0	0	0	0	0	0	0	1	0	1	0	0	1	3
680	0	68	1	3	1	1	1	1	2	2	2	0	1	0	0	0	0	0	0	0	0	0	1	1	0	1	0	0	0	3
681	1	68	1	3	1	1	2	1	2	2	2	0	1	0	0	0	0	0	0	0	0	0	0	1	1	1	0	1	1	5
682	0	68	1	3	1	1	1	1	2	2	1	0	1	1	0	0	0	0	0	0	0	0	0	1	0	0	0	1	2	4
683	1	68	1	3	1	1	1	1	2	2	1	0	1	1	0	0	0	0	0	0	0	0	0	0	0	0	0	0	0	0
684	1	68	1	3	1	1	1	1	2	2	2	0	1	0	0	0	0	0	0	0	0	0	0	1	1	1	0	0	1	4
685	1	68	2	3	2	2	1	1	2	1	2	1	0	0	0	0	0	0	0	0	0	0	0	0	0	1	0	0	1	2
686	0	68	1	3	6	1	2	1	3	1	2	0	1	1	0	0	0	0	0	0	0	2	1	1	1	1	1	1	1	9
687	1	68	1	3	3	2	2	2	3	1	2	1	0	0	0	0	0	0	0	0	0	2	2	1	0	0	1	3	1	10
688	1	68	1	3	6	2	2	1	1	2	2	0	1	0	0	0	0	0	0	0	0	3	2	3	2	3	1	2	2	18
689	0	68	1	3	1	1	1	1	2	2	1	0	1	0	0	0	0	0	0	0	0	1	0	0	0	0	0	0	1	2
690	0	68	1	3	3	2	1	1	2	1	2	0	1	0	0	0	0	0	0	0	0	2	2	2	2	2	0	0	1	11
691	1	68	2	3	1	1	1	1	2	1	99	0	1	0	0	0	0	0	0	0	0	0	0	1	1	1	0	0	1	4
692	0	68	1	3	1	1	2	1	2	2	1	0	1	1	0	1	0	0	0	0	0	0	1	1	0	0	0	0	0	2
693	0	68	1	3	1	1	1	1	2	1	2	0	1	0	0	0	0	0	0	0	0	1	0	0	0	0	0	0	1	2
694	1	68	1	3	1	1	1	1	2	2	2	0	1	1	0	0	0	0	0	0	0	0	0	0	1	1	0	0	1	3
695	1	68	2	3	2	2	1	2	2	1	3	1	0	0	0	0	0	0	0	0	0	1	0	1	1	1	0	0	2	6
696	1	68	1	1	1	1	1	1	2	2	1	0	1	0	0	0	0	0	0	0	0	0	0	0	0	0	0	0	1	1
697	0	68	1	3	1	1	1	1	2	2	2	0	1	1	0	1	0	0	0	0	0	0	0	0	0	0	0	0	1	1
698	0	68	1	3	1	2	1	1	3	2	2	0	1	1	0	0	0	0	0	0	0	1	2	2	2	2	0	1	2	12
699	0	68	1	3	2	2	1	1	2	2	2	0	1	0	0	0	0	0	0	0	0	3	2	1	1	1	1	1	1	11
700	0	68	1	3	1	1	1	1	2	99	2	0	1	1	0	0	0	0	0	0	0	1	0	0	0	0	0	0	1	2
701	1	68	1	3	1	2	1	1	2	2	1	0	1	1	0	0	0	0	0	1	0	2	0	1	1	1	1	1	1	8
702	0	68	1	3	1	1	1	1	2	2	2	0	1	0	0	0	0	0	0	0	0	3	2	1	1	1	1	2	1	12
703	0	68	2	3	1	1	1	1	2	1	2	0	1	1	0	0	0	0	0	0	1	0	1	1	1	0	0	0	1	4
704	0	68	1	3	2	2	1	1	2	2	2	0	1	1	1	0	0	1	0	0	0	99	0	1	1	1	0	0	1	103
705	1	68	1	3	2	2	1	1	2	1	3	0	1	0	0	0	0	0	0	0	0	0	0	0	1	0	0	0	1	2
706	0	68	1	3	1	1	1	1	2	2	2	0	1	0	0	0	0	0	0	0	0	2	2	2	2	2	0	0	2	12
707	1	68	1	5	3	2	2	1	3	2	3	0	1	0	0	0	0	0	0	0	0	1	1	1	1	1	1	2	1	9
708	1	68	2	3	2	1	1	1	2	1	1	0	0	0	1	0	0	0	0	0	0	0	0	0	0	0	0	0	0	0
709	0	68	2	3	2	2	1	1	2	99	2	0	0	0	1	0	0	0	0	0	0	1	99	0	1	1	0	1	1	104
710	1	68	2	3	2	2	1	2	2	1	2	0	1	0	0	0	0	0	0	0	0	0	0	0	0	0	0	0	1	1
711	0	68	2	3	4	1	1	2	99	1	2	0	0	0	0	0	0	0	0	1	0	2	2	99	2	2	3	3	2	115
712	0	68	1	3	1	1	1	1	2	2	3	0	1	0	0	0	0	0	0	0	0	1	1	0	0	1	0	0	0	3
713	0	68	2	3	2	2	1	1	2	1	3	0	0	1	0	0	0	0	0	0	0	1	0	2	2	1	1	1	1	9
714	0	68	1	3	1	1	2	1	2	2	2	0	1	0	0	0	0	1	0	0	0	1	1	0	0	1	0	1	1	5
715	0	68	1	3	1	1	1	1	2	2	2	0	1	1	0	0	0	0	0	0	0	1	0	1	1	1	1	1	1	7
716	1	68	2	3	2	1	2	2	2	1	2	1	0	0	0	0	0	0	0	0	0	1	1	1	1	1	1	1	1	8
717	1	68	2	3	3	2	1	1	2	1	2	0	0	0	0	1	0	1	0	0	0	2	2	2	1	1	1	1	1	11
718	1	68	1	3	3	2	1	1	2	2	1	0	1	0	0	0	0	0	0	0	0	0	0	0	0	0	0	0	1	1
719	0	68	2	3	2	2	1	1	2	1	3	0	1	0	0	0	0	0	0	0	0	0	0	0	0	0	0	0	0	0
720	0	68	1	1	3	2	1	1	2	2	2	0	1	0	0	0	0	0	0	0	0	0	0	0	0	0	0	0	0	0
721	0	68	1	3	1	1	1	1	2	2	2	0	1	0	0	1	0	0	0	0	0	0	0	0	0	0	0	0	1	1
722	1	68	1	3	6	2	99	2	3	99	3	1	0	0	0	0	0	0	0	0	0	0	2	1	2	1	1	1	2	10
723	0	68	1	3	1	1	2	1	2	2	2	0	1	1	0	0	0	0	0	0	0	1	1	0	0	1	0	1	1	5
724	0	68	2	3	2	2	1	1	3	1	2	0	1	0	0	0	0	0	0	0	0	3	2	1	2	2	1	2	1	14
725	0	68	2	3	99	1	1	1	2	1	3	0	1	0	0	0	0	0	0	0	0	0	0	1	1	1	0	0	1	4
726	1	68	2	3	2	2	1	1	2	1	2	0	1	1	0	0	0	0	0	0	0	0	0	0	0	1	0	1	1	3
727	0	68	2	3	1	1	1	1	2	1	2	0	0	1	1	0	0	0	0	0	0	1	1	2	1	1	1	0	1	8
728	1	68	1	1	4	2	1	1	2	2	2	0	1	0	0	0	0	0	0	0	0	0	0	0	0	0	0	0	0	0
729	1	68	1	3	3	2	1	1	3	2	2	0	1	0	0	0	0	0	0	0	0	0	0	0	0	0	0	1	1	2
730	1	68	1	3	1	1	1	1	2	2	1	0	1	1	0	0	0	0	0	0	0	1	0	1	1	1	0	0	1	5
731	0	68	1	3	2	2	1	1	2	2	2	0	0	1	0	0	0	0	0	0	0	0	0	0	0	1	0	0	0	1
732	0	68	1	3	3	2	1	1	2	2	2	0	1	0	0	0	0	0	0	0	0	1	1	0	0	0	1	2	1	6
733	1	68	2	3	2	2	1	1	3	1	3	0	0	1	0	0	0	0	0	0	0	1	0	1	1	1	1	1	1	7
734	1	68	1	1	1	1	1	1	2	2	3	0	0	0	0	0	0	0	0	0	1	0	99	0	1	0	0	0	1	101
735	0	68	1	3	1	1	1	1	2	2	1	0	1	0	0	1	0	0	0	0	0	0	1	2	1	1	0	0	1	6
736	0	68	1	3	2	2	2	2	2	2	2	0	1	0	0	0	0	1	1	0	0	1	1	1	1	1	0	1	1	7
737	0	68	2	3	3	2	2	2	2	1	2	0	0	0	0	0	0	1	0	0	0	2	2	0	0	2	1	2	2	11
738	1	68	2	3	2	1	1	2	3	1	2	0	0	0	0	0	0	1	0	0	0	2	2	3	2	2	1	1	1	14
739	0	68	2	3	3	2	1	1	2	1	2	0	1	1	0	1	0	0	0	0	0	1	0	1	1	1	0	0	0	4
740	0	68	2	1	3	2	2	2	3	1	3	0	0	0	0	0	0	1	0	1	0	3	2	2	2	2	0	1	1	13
741	0	68	2	1	3	2	1	1	3	1	1	0	0	1	0	0	0	0	0	0	0	2	1	1	1	1	1	1	2	10
742	0	68	2	3	2	1	1	1	3	1	2	0	0	1	0	0	0	0	0	0	0	2	0	1	1	1	0	0	1	6
743	1	68	2	3	2	1	1	2	3	1	1	0	0	0	1	0	0	0	0	0	0	0	0	0	1	0	0	1	1	3
744	1	68	1	3	1	1	1	1	2	2	1	0	1	1	0	0	0	1	0	0	0	0	0	1	0	0	0	0	0	1
745	0	68	1	3	1	1	1	1	2	2	1	0	1	1	0	0	0	0	0	0	0	0	0	0	0	0	0	0	1	1
746	1	68	1	3	1	1	1	1	2	2	1	0	0	0	1	0	0	0	0	0	0	1	0	0	0	1	0	0	1	3
747	1	68	2	3	3	1	2	2	3	1	2	0	1	0	0	0	0	1	0	0	1	3	2	1	2	2	3	2	1	16
748	0	68	1	3	1	1	1	1	2	2	1	0	1	1	0	0	0	0	0	0	0	1	0	1	1	1	1	1	1	7
749	0	68	1	3	2	2	1	2	2	2	3	0	1	0	0	0	0	0	0	0	0	1	1	2	1	1	0	0	1	7
750	1	68	1	1	1	1	2	1	2	2	1	0	1	1	0	0	0	0	0	0	0	1	2	1	0	1	0	0	1	6
751	0	68	2	3	1	1	1	1	2	1	2	0	1	1	0	0	0	0	0	0	0	0	0	1	0	0	0	0	1	2
752	1	68	1	3	1	1	1	1	2	2	3	0	1	0	0	0	0	0	0	0	0	0	1	0	0	0	0	0	0	1
753	1	68	2	3	2	2	1	1	2	1	2	0	1	0	0	0	0	0	0	0	0	1	0	1	1	1	0	0	1	5
754	0	68	2	3	3	2	1	1	2	1	2	0	1	1	0	0	0	0	0	0	0	1	1	1	1	1	0	0	0	5
755	0	68	1	3	1	1	1	1	2	2	1	0	1	0	0	0	0	0	0	0	0	1	0	1	1	1	0	1	1	6
756	0	68	1	3	2	1	1	1	1	2	1	0	1	1	0	0	0	0	0	0	0	1	0	1	1	1	1	0	1	6
757	0	68	1	3	1	1	1	1	2	2	2	0	1	1	0	0	0	0	0	0	0	1	0	0	0	0	0	0	0	1
758	0	68	1	1	1	1	1	1	2	2	2	0	1	1	0	0	0	0	0	0	0	0	0	1	0	0	0	1	0	2
759	0	68	1	3	1	1	1	1	2	1	2	0	0	1	0	0	0	0	0	0	0	1	1	1	1	1	0	0	1	6
760	0	68	1	3	2	1	1	1	2	2	1	0	1	0	0	0	0	0	0	0	0	0	0	1	0	1	0	0	1	3
761	1	68	1	3	1	1	1	1	2	2	2	0	1	0	0	0	0	0	0	0	0	0	0	1	0	1	0	0	0	2
762	0	68	1	3	1	1	1	1	3	2	2	0	0	1	0	0	0	0	0	0	0	0	0	0	0	0	0	0	1	1
763	1	68	1	3	1	1	1	1	2	2	2	0	1	1	0	0	0	0	0	0	0	0	0	0	0	0	0	1	1	2
764	1	68	1	3	1	1	2	1	2	2	1	0	1	0	0	0	0	0	0	0	0	0	0	0	0	0	0	0	0	0
765	1	68	1	3	1	1	1	1	2	2	1	0	1	1	0	0	0	0	0	0	0	0	0	0	0	0	0	0	1	1
766	1	68	2	3	3	2	2	1	2	1	1	0	0	0	0	0	0	0	0	0	1	0	0	0	0	0	0	1	1	2
767	0	68	1	3	2	2	1	1	3	2	3	1	0	0	0	0	0	0	0	0	0	0	0	1	0	0	0	0	1	2
768	0	68	1	3	1	1	1	1	2	2	2	0	1	1	0	0	0	0	0	0	0	1	1	1	1	1	0	0	0	5
769	0	68	1	3	1	1	1	1	2	2	2	0	1	0	0	0	0	0	0	0	1	0	0	1	1	0	0	0	1	3
770	1	68	1	3	3	1	1	1	2	2	2	0	1	0	0	0	0	0	0	0	0	0	0	0	0	0	0	0	1	1
771	1	68	1	3	1	1	1	1	2	2	2	0	1	0	0	0	0	0	0	0	0	0	0	1	1	1	0	0	1	4
772	1	68	1	3	2	2	1	1	2	2	3	0	1	1	0	1	0	0	0	0	0	0	0	0	0	0	0	0	1	1
773	1	68	1	1	1	2	1	1	3	1	2	0	1	0	0	0	0	0	0	0	0	2	1	1	1	1	0	0	0	6
774	1	68	1	3	2	2	1	2	2	2	2	0	1	0	0	0	0	0	0	0	0	0	0	1	0	0	0	1	0	2
775	1	68	1	3	1	1	1	1	2	2	1	0	1	0	0	0	0	0	0	0	0	0	0	0	0	0	0	0	0	0
776	1	68	1	3	1	1	1	1	2	2	1	0	1	1	0	0	0	0	0	0	0	0	0	0	1	1	0	0	1	3
777	0	68	1	3	2	1	1	1	2	1	2	0	1	1	0	0	0	0	0	0	0	0	0	0	0	0	0	0	1	1
778	0	68	2	3	3	3	1	2	3	1	2	0	1	0	1	0	0	0	0	0	0	0	0	0	0	0	0	1	1	2
779	0	68	2	3	3	1	1	2	2	1	2	0	1	0	0	0	0	0	0	0	0	2	1	2	1	1	1	1	1	10
780	0	68	2	3	2	3	2	2	2	1	3	0	1	1	0	0	0	0	0	0	0	1	1	1	1	1	1	1	0	7
781	1	68	1	3	3	2	2	2	2	2	2	0	0	1	0	0	0	0	0	0	0	0	1	0	0	1	1	2	1	6
782	0	68	2	3	3	2	1	1	2	1	1	0	1	0	0	0	0	0	0	0	1	1	1	1	0	0	1	0	0	4
783	0	68	1	3	1	1	1	1	3	2	2	0	1	0	0	0	0	0	0	0	0	0	2	2	2	2	1	2	1	12
784	1	68	1	3	3	2	2	1	2	2	2	0	1	0	0	0	0	0	0	0	0	0	0	0	1	1	0	1	1	4
785	0	68	1	3	1	1	1	1	2	2	2	0	1	0	0	0	0	0	0	0	0	0	0	0	0	0	0	0	1	1
786	0	68	1	3	1	1	1	2	3	2	2	0	0	1	0	0	0	0	0	0	0	2	1	2	1	2	1	1	1	11
787	0	68	1	1	1	1	1	1	2	2	1	0	1	0	0	0	0	0	0	0	0	0	0	0	0	0	0	0	1	1
788	1	68	1	3	3	2	2	2	2	2	2	0	1	0	0	0	0	0	0	0	0	1	0	0	0	1	0	0	0	2
789	0	68	1	3	1	1	1	1	2	2	2	0	1	1	0	0	0	0	0	0	0	0	0	0	1	1	0	0	1	3
790	1	68	1	3	2	2	1	2	3	1	3	0	1	0	0	0	0	0	0	0	0	2	2	2	2	2	2	2	1	15
791	0	68	1	3	1	1	1	1	2	2	2	0	0	0	0	0	0	0	0	0	1	1	1	1	1	1	0	0	1	6
792	1	68	1	1	4	2	1	1	3	2	1	0	1	0	0	0	0	0	0	0	0	0	0	0	0	0	0	0	0	0
793	0	68	1	3	1	1	1	2	2	2	2	0	1	0	0	0	0	0	0	0	0	2	1	1	1	1	0	0	0	6
794	1	68	1	3	1	1	1	1	2	2	1	0	0	1	0	1	0	0	0	0	0	0	0	0	0	0	0	0	0	0
795	1	68	1	3	2	1	2	2	2	2	2	0	0	0	0	1	0	0	0	0	0	1	0	1	0	0	0	0	0	2
796	0	68	1	1	1	1	1	2	2	2	3	0	1	0	0	0	0	0	0	0	0	0	0	1	0	0	0	0	1	2
797	0	68	2	3	2	3	2	1	2	1	2	0	0	0	0	0	0	0	0	0	1	0	0	1	1	0	1	1	1	5
798	0	68	1	3	1	1	1	1	2	2	2	0	1	0	0	0	0	0	0	0	0	1	2	0	1	1	0	1	1	7
799	0	68	1	3	1	1	1	1	2	2	1	0	1	1	0	0	0	0	0	0	0	0	0	0	0	0	0	0	1	1
800	1	68	1	3	1	1	1	1	2	2	2	0	1	0	0	0	0	0	0	0	0	0	0	0	0	0	0	0	1	1
801	1	68	1	3	3	2	1	99	99	2	1	0	1	0	0	0	0	0	0	0	0	99	99	99	99	99	1	1	99	596
802	1	68	2	3	2	2	1	1	2	1	3	1	0	0	0	0	0	0	0	0	0	0	0	0	1	0	0	0	0	1
803	0	68	2	3	2	2	1	1	3	1	1	0	1	1	0	0	0	0	0	0	0	1	0	1	1	1	1	1	1	7
804	0	68	1	3	1	1	99	1	2	99	2	0	1	1	0	0	0	0	0	0	0	0	0	1	0	0	0	0	1	2
805	0	68	1	3	1	1	99	1	2	2	3	0	1	0	0	0	0	0	0	0	0	1	0	0	0	0	0	0	1	2
806	1	68	1	3	1	1	1	1	2	2	1	0	1	1	0	0	0	0	0	0	0	0	0	0	0	0	0	1	1	2
807	0	68	1	3	1	1	2	1	3	2	2	99	99	99	99	99	99	99	99	99	99	3	1	1	2	2	1	2	2	14
808	1	68	1	3	1	1	1	1	2	2	2	0	1	0	0	0	0	0	0	0	0	1	0	0	0	1	0	0	0	2
809	0	68	1	3	2	2	1	2	2	2	3	0	1	0	0	0	0	0	0	0	0	0	0	0	0	1	0	0	0	1
810	1	68	1	1	1	1	2	1	2	2	2	0	1	0	0	0	0	0	0	0	0	0	1	2	1	1	0	0	1	6
811	0	68	1	3	2	2	1	1	2	2	2	0	1	0	0	0	0	0	0	0	0	1	1	2	1	2	1	1	0	9
812	1	68	2	3	3	1	2	1	2	3	2	0	1	0	1	0	0	0	0	1	0	0	0	3	3	1	1	0	1	9
813	0	68	1	3	1	1	1	1	1	2	2	0	0	1	0	0	0	0	0	0	0	2	1	2	1	1	0	0	1	8
814	1	68	1	3	1	1	1	1	2	2	1	0	1	1	0	0	0	0	0	0	0	0	0	1	0	0	1	0	0	2
815	0	68	1	3	3	2	1	1	2	2	2	0	1	1	0	0	0	0	0	0	0	0	0	0	1	1	0	1	1	4
816	0	68	1	3	2	2	1	1	2	2	2	0	1	0	0	0	0	0	0	0	0	1	0	1	0	0	1	0	0	3
817	0	68	1	3	1	1	1	1	2	2	2	0	1	1	0	0	0	0	1	0	0	1	0	1	0	1	0	1	1	5
818	1	68	1	3	1	2	1	1	2	2	1	0	1	1	1	0	0	0	0	0	0	0	0	0	0	1	0	0	1	2
819	0	68	1	3	2	2	1	1	2	2	2	0	1	0	0	0	0	0	0	0	0	0	0	1	1	1	0	0	1	4
820	1	68	1	1	1	1	1	1	2	2	1	1	1	0	0	0	0	0	0	0	0	1	0	1	1	0	0	1	1	5
821	0	68	1	3	2	2	1	1	2	2	2	0	1	0	0	0	0	0	0	0	0	1	0	0	0	0	0	0	0	1
822	0	68	1	3	2	2	1	1	2	2	3	0	1	0	0	0	0	0	0	0	0	0	0	0	0	0	0	0	1	1
823	0	68	2	3	2	2	1	1	2	1	2	0	1	1	0	0	0	0	0	0	0	1	1	1	0	1	0	0	1	5
824	0	68	1	3	2	2	2	2	1	2	3	0	1	1	0	1	0	0	0	0	0	0	0	0	1	1	0	0	1	3
825	1	68	1	1	1	1	1	1	2	2	1	0	1	1	0	0	0	0	0	0	0	0	2	2	0	1	0	1	2	8
826	1	68	1	3	1	1	2	1	3	2	3	1	0	0	0	0	0	0	0	0	0	2	1	1	1	1	0	1	1	8
827	0	68	1	3	1	1	1	1	2	2	2	0	1	1	0	0	0	0	0	0	0	1	1	1	0	0	0	1	1	5
828	1	68	1	1	1	1	1	1	2	2	1	99	99	99	99	99	99	99	99	99	99	0	0	0	0	0	0	0	0	0
829	0	68	2	5	1	1	1	1	2	2	2	0	1	1	1	1	0	0	0	0	0	0	0	0	0	0	0	0	1	1
830	0	68	1	3	1	1	1	1	2	2	2	0	1	1	1	0	0	0	0	0	0	0	0	0	0	0	0	0	1	1
831	0	68	1	3	2	2	1	1	2	2	3	0	1	1	0	0	0	0	0	0	0	2	1	1	2	1	0	1	1	9
832	0	68	1	3	3	2	1	1	2	2	1	0	0	0	0	0	0	0	0	0	1	1	0	1	0	0	0	0	1	3
833	1	68	1	3	2	2	1	1	2	2	2	0	1	0	0	0	0	0	0	0	0	0	0	0	0	0	0	0	0	0
834	0	68	1	3	1	1	1	2	2	2	2	0	1	1	1	1	0	0	0	0	0	0	0	0	0	0	0	0	1	1
835	0	68	2	3	1	1	1	1	2	1	2	0	0	1	0	0	0	0	0	0	0	1	0	0	0	0	0	0	0	1
836	0	68	1	3	3	2	2	2	2	2	2	0	0	1	0	0	0	0	0	0	0	1	0	1	1	1	1	1	1	7
837	0	68	1	3	1	1	1	1	3	2	2	0	1	0	0	0	0	0	0	0	0	0	0	1	0	0	0	0	1	2
838	1	68	1	5	3	2	1	1	2	2	1	0	1	0	0	0	0	0	0	0	0	2	2	2	1	1	1	2	1	12
839	0	68	1	3	3	2	2	2	3	2	1	0	1	0	0	0	0	0	0	0	0	2	1	2	2	2	1	1	1	12
840	1	68	1	3	2	2	1	1	2	2	3	0	1	0	0	0	0	0	0	0	0	1	1	1	1	2	0	1	1	8
841	0	68	1	5	1	1	1	1	2	2	2	0	1	1	0	0	0	1	0	0	0	1	1	1	1	1	0	0	1	6
842	0	68	2	3	1	1	1	1	2	1	2	0	1	0	1	0	0	0	0	0	1	2	0	1	0	1	0	0	1	5
843	0	68	1	3	1	1	1	1	2	1	2	0	1	0	0	0	0	0	0	0	0	1	0	0	0	0	0	0	1	2
844	0	68	1	3	2	1	1	1	2	2	2	0	1	1	0	0	0	0	0	0	0	0	0	0	1	1	1	0	1	4
845	1	68	1	3	1	1	2	1	2	2	2	0	1	1	0	0	0	0	0	0	0	0	0	1	1	1	0	0	1	4
846	0	68	1	3	6	1	2	1	2	2	2	0	1	0	0	0	0	0	0	0	0	1	0	1	1	1	0	1	1	6
847	0	68	2	5	3	2	1	1	2	1	3	1	0	0	0	0	0	0	0	0	1	1	1	1	1	1	1	1	1	8
848	0	68	1	3	1	1	2	1	2	2	2	0	1	1	0	0	0	0	0	0	0	1	0	1	0	1	0	0	1	4
849	0	68	1	1	1	1	1	1	2	2	2	0	1	1	1	0	0	0	0	0	0	0	0	0	0	0	0	1	0	1
850	0	68	2	3	3	2	2	2	1	1	2	0	0	1	0	0	0	0	0	0	0	2	2	2	2	2	2	3	0	15
851	0	68	2	3	2	2	1	1	2	1	2	0	1	1	0	0	0	0	0	0	0	0	0	0	1	1	0	0	1	3
852	1	68	2	1	1	1	1	1	2	1	1	0	1	1	0	0	0	0	0	0	0	0	0	0	0	0	0	0	0	0
853	1	68	1	3	2	1	1	1	2	2	2	0	1	0	0	0	0	0	0	0	0	0	0	0	0	0	0	0	1	1
854	0	68	1	3	2	1	1	1	2	2	2	0	1	1	0	0	0	0	0	0	0	99	0	1	1	1	0	1	1	104
855	1	68	1	3	2	2	2	1	3	2	2	0	1	0	0	0	0	0	0	0	0	1	0	0	0	0	0	1	1	3
856	0	68	1	3	2	2	1	1	2	2	2	0	1	0	0	0	0	0	0	0	0	1	0	0	0	0	0	0	1	2
857	1	68	1	3	1	1	1	1	2	1	1	1	0	0	0	0	0	0	0	0	0	1	1	1	1	1	0	1	1	7
858	0	68	2	5	2	3	1	1	1	1	3	0	0	0	0	0	0	0	0	1	0	3	2	2	2	2	2	3	3	19
859	0	68	2	3	2	1	1	1	2	1	2	0	1	1	0	0	0	0	0	0	0	1	1	2	1	1	1	1	1	9
860	0	68	2	3	2	2	1	1	1	1	3	0	1	0	0	0	0	1	0	1	0	99	1	1	1	2	1	1	2	108
861	1	68	2	3	2	1	2	1	2	1	2	0	1	0	0	0	0	1	0	0	0	1	0	0	0	0	0	0	1	2
862	1	68	1	3	1	2	1	1	2	1	2	0	0	1	0	0	0	0	0	0	0	0	0	1	0	1	0	0	1	3
863	1	68	1	3	1	1	1	1	2	1	1	0	1	0	0	0	0	1	0	0	0	0	0	1	0	0	0	0	0	1
864	1	68	1	3	1	1	1	1	2	2	2	0	1	0	0	0	0	0	0	0	0	0	0	0	0	0	0	0	1	1
865	0	68	1	3	3	2	2	1	3	2	2	0	1	0	0	0	0	0	0	0	0	2	1	2	2	2	3	3	2	17
866	0	68	1	3	3	1	2	2	2	2	2	0	0	1	0	0	0	0	0	0	0	1	0	1	1	1	0	0	1	5
867	1	68	1	3	1	1	2	2	2	2	2	1	0	0	0	0	0	0	0	0	0	1	1	0	1	1	1	1	1	7
868	0	68	1	3	2	1	1	1	2	2	2	0	1	0	0	0	0	0	0	0	0	0	99	0	0	0	0	0	1	100
869	1	68	2	3	2	2	1	1	2	1	2	0	0	0	0	0	0	0	0	0	1	1	0	1	1	1	0	2	99	105
870	1	68	1	3	1	1	2	2	3	2	2	0	1	1	0	0	0	0	0	0	0	0	0	0	0	0	0	1	0	1
871	1	68	1	3	1	1	1	1	2	2	2	0	1	0	0	0	0	0	0	0	0	0	0	0	0	0	0	0	0	0
872	0	68	1	3	2	3	1	1	2	2	3	0	0	0	0	0	0	0	1	0	0	3	2	1	2	2	1	2	2	15
873	0	68	2	3	4	1	1	2	3	1	2	0	1	0	0	0	0	0	0	0	0	1	0	0	0	1	1	1	1	5
874	0	68	1	3	1	1	1	1	3	2	1	0	1	1	0	0	0	0	0	0	0	3	0	1	1	1	1	1	1	9
875	0	68	2	3	3	3	2	2	2	1	2	0	0	0	0	1	0	0	0	0	1	1	1	2	1	1	0	0	1	7
876	0	68	1	5	3	2	1	1	2	2	1	0	1	1	0	0	0	1	1	0	0	2	2	3	2	2	0	1	2	14
877	1	68	1	3	1	1	1	1	2	2	1	0	1	0	0	0	0	0	0	0	0	0	0	0	0	0	0	0	0	0
878	0	68	1	3	2	2	2	2	3	2	2	0	1	0	0	0	0	0	0	0	0	1	1	0	0	0	0	1	1	4
879	1	68	1	3	2	1	1	1	2	2	2	0	1	0	0	0	0	0	0	0	0	0	99	0	0	0	0	0	1	100
880	0	68	1	3	2	2	99	99	2	2	2	0	1	0	0	0	0	0	0	0	0	1	2	2	2	2	2	2	2	15
881	1	68	99	3	99	99	1	1	2	1	1	0	0	0	0	0	1	1	1	1	0	0	0	1	1	0	0	0	1	3
882	0	68	2	3	1	1	1	1	2	1	2	0	1	1	0	0	0	0	0	0	0	1	0	1	0	1	0	0	1	4
883	1	68	1	3	1	1	2	1	2	2	2	0	0	1	0	0	0	1	0	0	0	1	0	1	0	0	1	1	1	5
884	0	68	1	3	1	1	99	1	2	2	2	0	1	0	0	0	0	0	0	0	0	0	0	0	1	1	0	0	1	3
885	1	68	2	3	3	99	99	2	99	1	2	1	0	0	0	0	0	0	0	0	0	2	2	2	1	1	1	1	1	11
886	0	68	1	3	1	1	2	1	2	2	2	0	1	0	0	0	0	0	0	0	0	1	1	1	1	1	0	0	1	6
887	1	68	1	3	2	2	2	1	1	2	3	0	1	0	0	0	0	0	0	0	0	0	0	1	0	0	0	1	1	3
888	1	68	2	3	2	2	1	1	2	1	3	0	1	0	0	0	0	0	0	0	0	0	1	0	1	1	0	0	0	3
889	1	68	2	3	1	1	1	2	2	1	1	0	0	1	0	1	0	0	0	0	0	0	0	0	1	1	0	0	1	3
890	1	68	1	3	1	1	1	1	1	2	2	0	1	0	0	0	0	0	0	0	0	0	0	1	1	0	0	0	1	3
891	0	68	1	3	1	1	1	1	2	2	99	0	1	0	0	0	0	0	0	0	0	0	0	0	0	0	0	0	0	0
892	1	68	1	1	1	1	1	1	2	2	2	0	1	0	0	0	0	0	0	0	0	0	0	1	1	1	0	0	1	4
893	0	68	1	3	2	2	1	1	3	1	2	0	1	1	0	0	0	0	0	0	0	1	0	1	1	1	1	0	1	6
894	0	68	1	5	3	2	1	2	2	2	2	0	1	0	0	0	0	0	0	0	0	1	0	1	1	0	0	0	1	4
895	0	68	1	1	1	1	1	1	2	2	2	0	1	0	1	0	0	0	0	0	0	1	0	1	1	1	0	0	1	5
896	1	68	2	3	1	1	2	2	3	1	2	1	0	0	0	0	0	0	0	0	0	1	1	1	1	1	1	1	1	8
897	0	68	1	3	1	1	1	1	2	2	1	0	1	0	0	0	0	0	0	0	1	0	0	0	0	0	0	0	1	1
898	0	68	1	3	1	1	1	2	2	2	2	0	1	0	0	0	0	0	0	0	0	0	0	0	0	0	0	0	1	1
899	1	68	2	3	2	1	2	1	2	1	3	1	0	0	0	0	0	0	0	0	0	2	2	2	2	2	1	2	1	14
900	1	68	1	3	1	1	2	1	2	2	2	0	1	1	0	0	0	0	0	0	0	0	0	1	0	0	0	0	1	2
901	0	68	1	3	1	1	1	1	2	2	2	0	0	1	0	0	0	0	0	0	0	0	1	1	1	1	0	0	1	5
902	0	68	1	3	1	1	2	1	1	2	99	0	1	1	0	0	0	0	0	0	0	1	1	1	1	1	0	0	1	6
903	0	68	1	3	1	1	1	1	2	2	2	0	1	1	1	0	0	0	0	0	0	1	0	0	0	0	0	0	0	1
904	0	68	2	3	2	2	2	1	2	1	3	0	0	0	0	0	0	0	0	0	1	1	0	1	1	1	0	0	1	5
905	0	68	2	3	3	1	1	1	3	1	1	0	0	1	0	0	0	0	0	0	0	2	0	1	2	2	1	0	1	9
906	1	68	2	1	3	2	2	1	2	3	1	0	0	0	0	0	1	0	0	0	0	0	0	0	0	1	0	0	0	1
907	1	68	1	3	1	1	1	1	1	2	2	0	1	0	0	0	0	0	0	0	0	1	0	1	1	1	0	0	0	4
908	1	68	1	3	1	1	1	1	2	2	2	0	1	0	0	0	0	0	0	0	0	1	0	1	1	1	0	0	1	5
909	0	69	1	3	1	1	1	1	3	2	2	0	1	1	1	0	0	0	0	0	0	1	1	1	1	2	99	2	1	108
910	0	69	1	3	2	2	1	1	2	2	2	0	1	1	0	0	0	0	0	0	0	0	0	0	0	0	0	0	1	1
911	0	69	1	3	1	1	1	1	2	2	2	0	0	0	0	1	0	0	0	0	0	0	0	0	1	1	0	0	1	3
912	0	69	1	3	1	2	1	1	2	2	2	0	1	0	0	0	0	0	0	0	0	0	1	1	1	1	0	1	1	6
913	0	69	1	3	1	1	1	1	2	2	1	0	1	1	1	0	0	0	0	0	0	0	0	0	1	1	1	0	1	4
914	0	69	2	5	3	2	2	1	2	1	2	0	1	0	0	1	0	1	0	0	0	0	0	1	1	1	0	1	1	5
915	0	69	2	3	1	1	1	1	2	1	1	0	0	1	0	0	0	0	0	0	0	0	0	0	0	0	0	0	0	0
916	1	69	1	3	1	1	99	1	1	99	2	0	1	0	0	0	0	1	0	0	0	0	0	0	1	0	1	0	0	2
917	0	69	2	3	6	2	2	1	2	1	2	0	0	0	0	0	0	0	1	0	0	0	0	1	0	0	0	0	1	2
918	0	69	1	3	1	1	1	1	2	2	2	0	1	0	0	0	0	0	0	0	0	0	0	0	0	0	0	0	0	0
919	1	69	1	3	1	1	2	1	3	2	2	0	1	1	0	0	0	0	0	0	0	0	0	1	1	1	0	1	1	5
920	0	69	1	3	2	3	1	2	2	2	2	0	1	1	0	0	0	0	0	0	0	0	0	0	0	0	0	1	1	2
921	1	69	1	3	1	1	1	1	2	2	2	0	1	0	0	0	0	0	0	0	0	0	1	0	0	1	0	0	0	2
922	1	69	1	3	1	1	1	1	2	2	1	0	1	0	0	0	0	0	0	0	0	1	0	0	0	0	0	0	1	2
923	1	69	1	3	3	2	2	1	2	2	2	0	1	0	0	0	0	0	0	0	0	0	0	1	1	1	0	0	1	4
924	0	69	1	3	1	1	1	1	2	2	2	0	1	0	0	0	0	0	0	0	0	1	1	1	0	0	0	1	1	5
925	0	69	2	3	2	2	1	1	2	1	3	0	1	1	0	0	0	0	0	0	0	1	1	1	1	1	1	1	1	8
926	1	69	1	3	2	2	2	1	3	2	2	0	1	0	0	0	0	0	0	0	0	1	1	2	1	2	1	2	1	11
927	0	69	1	5	1	1	1	1	1	2	1	0	1	1	0	0	0	0	0	0	0	1	1	1	0	0	1	1	1	6
928	1	69	1	1	1	1	1	1	2	2	1	0	1	1	0	1	0	0	0	0	0	1	1	0	1	1	0	0	1	5
929	1	69	1	3	1	1	1	1	3	2	2	0	1	0	0	0	0	0	0	0	0	0	0	0	0	1	0	0	1	2
930	0	69	1	3	1	1	1	1	2	1	2	0	1	1	0	0	0	0	0	0	0	0	0	0	0	0	0	0	1	1
931	0	69	1	3	1	1	2	1	2	1	2	0	1	0	0	0	0	0	0	0	0	1	1	1	0	1	0	0	0	4
932	0	69	1	3	2	1	1	1	2	2	2	0	1	1	0	0	0	0	0	0	0	1	1	1	1	1	1	1	1	8
933	0	69	1	3	1	1	1	1	2	2	2	0	0	1	0	1	0	0	0	0	0	1	1	1	1	1	1	2	1	9
934	0	69	2	3	2	2	1	2	3	3	2	0	0	1	0	0	0	1	0	0	0	0	0	0	0	0	0	0	1	1
935	1	69	1	3	2	3	1	1	2	2	2	0	1	0	0	0	0	0	0	0	0	0	0	0	0	0	0	0	0	0
936	1	69	1	3	1	1	2	1	2	1	2	1	0	0	0	0	0	0	0	0	0	1	0	1	1	0	0	0	1	4
937	1	69	1	3	1	1	1	1	2	2	1	0	1	0	0	0	0	0	0	0	0	1	1	1	0	0	0	0	1	4
938	1	69	1	3	1	1	1	1	1	2	2	0	1	0	0	0	0	1	0	0	0	0	0	0	0	0	0	0	1	1
939	0	69	1	3	2	2	1	1	3	2	2	0	0	1	0	0	0	1	0	0	0	1	1	0	0	1	1	1	1	6
940	0	69	2	3	1	1	2	1	2	1	2	0	0	1	1	0	0	0	0	0	1	0	0	1	1	1	2	2	1	8
941	0	69	1	3	2	2	1	2	2	2	2	0	0	0	0	1	0	0	0	0	0	99	0	1	1	1	0	1	1	104
942	1	69	1	3	1	1	1	1	2	2	2	0	1	1	0	0	0	0	0	0	0	1	1	2	1	1	1	2	1	10
943	1	69	1	3	2	1	1	1	2	1	1	0	0	1	0	0	0	0	0	0	0	0	0	1	0	0	0	0	1	2
944	0	69	1	3	1	1	1	1	1	1	3	1	0	0	0	0	0	0	0	0	0	2	1	2	2	1	1	1	1	11
945	1	69	1	3	1	2	1	1	2	2	2	0	1	0	0	0	0	0	0	0	0	0	0	1	0	0	0	0	1	2
946	1	69	1	3	1	1	1	1	2	2	2	0	1	0	0	0	0	0	0	0	0	0	0	0	0	0	0	0	0	0
947	1	69	1	3	1	2	1	1	2	2	2	0	1	0	0	0	0	0	0	0	0	0	0	0	0	0	0	0	0	0
948	0	69	1	3	1	1	1	1	2	2	1	0	1	1	0	0	0	0	0	0	0	0	0	0	0	1	1	1	1	4
949	0	69	1	3	1	1	1	1	2	2	2	0	0	1	0	0	0	0	0	0	0	0	0	0	0	0	0	0	0	0
950	1	69	1	3	3	2	1	1	2	2	2	0	1	0	0	0	0	1	0	1	0	1	0	1	1	1	0	0	1	5
951	1	69	1	3	1	1	1	1	2	2	2	0	1	0	0	0	0	0	0	0	0	0	0	1	1	0	0	0	1	3
952	0	69	1	3	2	2	1	1	2	2	2	0	1	1	0	0	0	0	0	0	0	0	0	0	0	0	0	0	0	0
953	0	69	2	3	1	1	1	1	2	1	2	0	0	1	1	0	0	0	0	0	0	0	0	0	0	0	0	0	1	1
954	1	69	2	1	3	2	2	1	3	1	2	0	0	0	0	0	0	0	0	0	1	2	2	2	1	1	0	3	1	12
955	0	69	1	3	2	1	1	2	3	2	2	0	1	0	0	0	0	0	0	0	0	2	2	3	3	1	0	0	1	12
956	1	69	2	3	3	2	2	1	2	1	2	0	1	1	0	0	0	0	0	0	0	0	0	0	1	1	0	1	1	4
957	0	69	2	3	3	2	2	2	1	1	2	0	0	1	0	0	0	0	0	0	0	3	2	3	99	2	2	2	2	115
958	0	69	1	3	2	2	2	2	3	2	2	0	1	0	0	0	0	0	0	0	0	1	0	1	0	1	1	1	1	6
959	0	69	1	3	3	2	1	1	3	2	1	0	1	0	0	0	0	0	0	0	0	2	0	1	1	1	0	0	0	5
960	1	69	1	3	3	2	1	1	2	2	1	0	1	1	0	0	0	0	0	0	0	0	0	0	0	0	0	0	0	0
961	1	69	2	3	1	1	2	1	2	1	2	0	0	1	0	0	0	0	0	0	0	0	1	1	0	1	1	1	2	7
962	0	69	1	3	1	1	1	1	2	1	2	0	1	0	0	1	0	0	0	0	0	1	0	1	0	0	0	0	1	3
963	1	69	1	3	2	2	1	1	2	2	3	0	1	0	0	0	0	0	0	0	0	2	1	1	1	2	0	1	1	9
964	0	69	1	3	2	2	1	1	3	1	2	0	1	0	0	0	0	1	0	0	0	1	0	1	1	1	1	1	0	6
965	0	69	2	3	3	2	1	1	2	1	2	0	1	1	0	0	0	0	0	0	0	0	0	1	0	1	0	0	1	3
966	0	69	2	3	2	1	1	2	2	3	2	0	1	1	0	0	0	0	0	0	0	0	0	1	0	0	0	0	1	2
967	0	69	1	3	2	2	1	1	2	2	1	0	1	1	0	0	0	1	0	0	0	0	0	0	0	0	0	0	0	0
968	0	69	2	3	2	2	1	1	2	1	2	0	0	0	0	0	0	0	1	0	0	0	0	0	0	0	0	0	0	0
969	0	69	2	3	2	1	1	1	2	1	2	0	0	1	0	0	0	1	0	0	0	1	0	1	1	1	1	1	1	7
970	0	69	2	3	1	1	1	1	2	1	2	0	1	1	0	0	0	0	0	0	0	1	0	1	1	1	1	1	1	7
971	0	69	2	3	1	1	2	1	1	1	1	1	0	0	0	0	0	0	0	0	0	3	2	2	2	2	1	1	1	14
972	1	69	2	3	1	1	1	1	2	1	2	1	0	0	0	0	0	0	0	0	0	0	0	0	0	0	0	0	0	0
973	0	69	2	3	2	1	1	1	3	1	2	0	1	1	0	0	0	0	0	0	0	0	1	0	0	0	1	2	1	5
974	1	69	2	3	2	1	1	2	2	1	2	0	1	1	1	0	0	0	0	0	0	0	0	1	0	0	0	0	1	2
975	1	69	2	3	2	2	1	1	2	1	2	0	0	0	0	0	0	0	0	0	1	1	1	2	1	1	1	1	1	9
976	0	69	2	3	2	1	1	1	2	1	2	0	1	1	0	1	0	0	0	0	0	1	0	1	1	1	0	1	1	6
977	1	69	2	3	2	3	1	2	1	1	2	0	1	1	0	0	0	0	0	0	0	2	1	1	1	1	1	1	1	9
978	1	69	2	3	1	1	1	1	2	1	2	0	0	1	0	0	0	0	0	0	0	1	1	1	1	1	0	0	1	6
979	0	69	1	3	1	1	1	1	2	2	2	0	1	1	0	0	0	0	0	0	0	0	0	0	0	0	0	0	0	0
980	0	69	1	3	1	1	1	1	2	2	1	0	1	0	0	0	0	0	0	0	0	0	0	0	0	0	0	0	0	0
981	0	69	1	3	1	1	1	1	1	2	2	0	1	0	0	0	0	0	1	0	0	0	0	0	0	0	0	1	2	3
982	0	69	1	3	1	1	1	2	3	1	2	0	0	0	0	0	0	0	0	0	1	1	1	2	2	1	1	1	1	10
983	0	69	2	3	2	2	1	1	3	2	3	0	1	0	0	0	0	0	0	0	0	3	1	0	2	2	99	1	1	109
984	0	69	1	3	1	1	1	1	99	2	2	0	1	0	0	0	0	0	0	0	0	99	1	1	1	1	0	1	1	105
985	1	69	2	1	3	2	1	1	3	1	1	0	0	1	0	0	0	1	0	1	0	2	1	1	1	2	1	2	1	11
986	1	69	1	3	1	1	1	2	2	2	2	0	0	1	0	0	0	0	0	0	0	1	1	0	0	1	1	1	1	6
987	0	69	2	3	2	2	2	2	2	1	2	0	1	1	0	0	0	0	0	0	0	0	0	0	1	1	0	0	0	2
988	0	69	2	3	3	1	1	1	2	1	2	1	0	0	0	0	0	0	0	0	0	1	0	0	0	0	0	3	2	6
989	1	69	2	3	1	2	1	1	2	1	2	0	1	0	0	0	0	0	0	0	0	1	1	1	0	1	0	0	1	5
990	0	69	2	3	2	2	1	2	3	2	3	0	1	0	0	0	0	0	0	0	0	1	0	0	1	0	1	1	1	5
991	1	69	1	3	1	1	1	1	2	2	2	0	1	1	0	0	0	1	0	0	0	0	1	0	0	1	0	0	0	2
992	1	69	1	3	1	1	1	1	2	2	2	0	1	1	0	1	0	1	0	0	0	0	0	0	0	0	0	0	1	1
993	1	69	1	3	1	1	1	1	2	2	1	0	1	1	0	0	0	0	0	0	0	0	0	0	1	0	0	0	1	2
994	0	69	1	3	2	1	1	1	2	2	1	0	1	0	0	0	0	0	0	0	0	1	1	1	1	1	1	0	1	7
995	0	69	1	1	1	1	99	1	2	99	1	0	1	0	0	0	0	0	0	0	0	1	0	0	0	0	0	0	1	2
996	0	69	1	3	1	1	1	1	2	2	2	0	1	0	0	0	0	0	0	0	0	2	2	1	1	2	0	1	1	10
997	1	69	1	3	1	1	1	1	2	2	2	0	1	1	0	0	0	0	0	0	0	2	1	2	2	1	0	1	1	10
998	0	69	1	3	3	2	1	1	2	2	1	0	1	1	0	0	0	0	0	0	0	1	1	2	1	1	1	1	2	10
999	0	69	1	3	3	2	2	1	2	2	2	0	1	1	0	1	0	0	0	0	0	1	1	1	1	1	0	1	1	7
1000	1	69	1	3	2	2	1	1	2	2	2	0	1	1	0	0	0	0	0	0	0	0	0	0	0	0	0	1	1	2
1001	1	69	1	1	4	2	1	1	3	2	2	0	1	0	0	0	0	0	0	0	0	0	0	0	0	0	0	2	1	3
1002	0	69	1	3	1	1	1	1	2	2	1	0	1	1	1	0	0	0	0	0	0	0	0	0	0	0	1	0	1	2
1003	1	69	1	3	1	1	2	1	2	2	1	0	1	0	0	0	0	0	0	0	0	0	0	0	0	0	0	0	1	1
1004	0	69	1	3	1	1	99	1	99	99	1	0	1	0	0	0	0	0	0	0	0	0	0	0	0	0	0	0	0	0
1005	0	69	1	3	1	1	1	1	2	2	2	0	0	1	0	0	0	0	0	0	0	0	0	1	0	0	1	1	1	4
1006	0	69	1	3	1	1	1	1	2	2	2	0	1	0	0	0	0	0	0	0	0	0	0	0	0	0	0	0	0	0
1007	1	69	2	1	1	1	1	1	2	1	1	1	0	0	0	0	0	0	0	0	0	0	1	1	0	0	1	2	0	5
1008	0	69	2	3	2	2	1	1	2	1	2	1	0	0	0	0	0	0	0	0	0	1	1	1	2	2	1	0	2	10
1009	0	69	2	1	3	2	1	1	1	1	2	0	0	1	0	0	0	0	0	1	0	2	2	2	2	2	1	2	1	14
1010	1	69	2	3	2	2	1	1	2	1	3	0	0	1	0	0	0	0	0	0	0	1	1	1	0	0	1	1	0	5
1011	0	69	2	3	3	2	1	1	2	1	2	0	1	1	0	0	0	0	0	0	0	1	1	1	1	1	1	1	1	8
1012	0	69	2	3	1	99	99	1	2	1	2	0	1	1	0	0	0	0	0	0	0	1	0	0	1	0	0	0	1	3
1013	0	69	2	3	3	99	1	2	3	1	2	0	0	1	0	0	0	0	0	0	0	1	0	0	1	1	0	0	1	4
1014	0	69	1	3	1	2	1	1	1	2	2	0	1	0	0	0	0	0	0	0	0	0	0	0	1	0	0	0	1	2
1015	1	69	1	3	1	2	2	1	2	2	2	0	1	1	0	0	0	0	0	0	0	0	0	0	0	0	0	0	0	0
1016	1	69	1	3	1	1	1	1	2	2	1	0	1	0	0	0	0	0	0	0	0	0	0	0	0	0	0	0	1	1
1017	0	69	1	3	1	1	1	1	2	2	1	0	0	1	0	0	0	0	0	0	0	0	0	0	0	0	0	0	1	1
1018	0	69	1	3	2	2	1	1	2	2	2	0	1	1	0	1	0	0	0	0	0	0	0	0	0	0	0	0	0	0
1019	0	69	1	5	1	1	1	1	3	2	1	0	1	1	0	0	0	0	0	0	0	1	1	1	2	2	1	1	2	11
1020	1	69	1	1	1	1	1	1	2	2	1	0	1	0	0	0	0	0	0	0	0	0	0	0	1	0	0	0	0	1
1021	0	69	1	3	2	1	2	1	2	3	2	0	1	1	0	1	0	0	0	0	0	1	0	1	1	1	0	0	0	4
1022	0	69	1	3	1	1	1	1	2	2	2	0	1	1	0	1	0	0	0	0	0	1	0	1	1	1	0	0	1	5
1023	1	69	2	1	4	2	2	1	2	1	1	0	0	0	0	0	0	1	0	0	0	1	0	1	1	1	0	0	1	5
1024	1	69	1	3	3	2	1	1	3	2	3	1	1	0	0	0	0	0	0	0	0	0	1	0	0	0	1	1	2	5
1025	0	69	1	3	1	1	1	1	2	2	2	1	0	0	0	0	0	0	0	0	0	1	0	1	1	1	1	1	1	7
1026	1	69	1	3	3	2	1	1	1	2	2	0	1	0	0	0	0	0	0	0	0	0	0	0	0	0	0	1	1	2
1027	0	69	1	3	1	1	1	1	3	2	3	0	1	1	1	0	0	0	0	0	0	99	1	1	0	1	0	2	99	203
1028	0	69	1	3	2	2	1	1	2	2	2	0	1	0	0	0	0	0	0	0	0	0	0	0	0	0	1	0	0	1
1029	1	69	1	3	1	1	1	1	2	2	1	0	1	0	0	0	0	0	0	0	0	0	0	1	0	1	0	0	1	3
1030	1	69	1	3	1	1	1	1	2	2	1	0	1	1	1	0	0	1	0	1	0	0	0	0	0	0	0	0	0	0
1031	0	69	1	3	1	2	1	1	2	2	2	0	1	1	0	0	0	0	0	0	0	0	0	0	0	0	0	1	1	2
1032	1	69	1	3	2	2	1	2	3	1	2	1	0	0	0	0	0	0	0	0	0	3	2	2	2	2	1	1	2	15
1033	0	69	1	3	1	1	1	1	2	2	1	0	1	1	0	0	0	0	0	0	0	1	0	1	1	1	0	0	1	5
1034	1	69	1	3	1	1	1	1	2	2	2	0	1	0	0	1	0	0	0	0	0	0	0	0	0	0	0	0	0	0
1035	0	69	1	3	1	1	1	1	2	2	2	0	1	1	0	0	0	0	0	0	0	0	0	0	0	0	0	0	1	1
1036	1	69	1	3	1	1	1	1	2	2	2	0	1	1	0	0	0	0	0	0	0	0	1	0	0	1	0	0	0	2
1037	1	69	2	3	2	1	1	1	2	1	1	0	0	1	0	1	0	0	0	0	0	0	0	0	1	1	0	0	1	3
1038	0	69	1	5	1	1	2	1	2	2	2	0	1	0	0	0	0	0	0	0	0	1	0	0	0	0	0	0	1	2
1039	0	69	1	3	1	2	1	1	3	2	3	0	1	0	0	0	0	0	0	0	0	1	2	2	1	1	1	1	1	10
1040	1	69	1	3	1	1	1	1	2	2	2	0	1	1	0	0	0	0	0	0	0	1	0	1	1	1	0	1	1	6
1041	0	69	2	3	3	1	1	1	2	1	1	0	1	1	0	0	0	0	0	0	0	1	0	0	0	0	0	1	0	2
1042	0	69	1	3	1	1	1	1	2	1	1	0	0	0	0	0	0	0	0	0	1	1	0	1	1	1	0	0	1	5
1043	1	69	1	3	1	1	1	1	2	2	2	0	1	1	0	0	0	0	0	0	0	1	1	0	0	0	0	0	1	3
1044	0	69	2	3	3	2	1	2	2	1	3	0	1	0	0	0	0	0	0	0	0	1	1	1	1	1	0	0	1	6
1045	1	69	1	1	1	1	1	1	2	2	1	0	1	1	1	0	0	0	0	0	0	2	1	1	1	1	1	1	1	9
1046	0	69	1	3	2	2	2	2	2	1	2	0	1	0	0	0	0	0	0	0	0	0	0	1	0	1	0	0	0	2
1047	0	69	1	3	2	2	1	1	2	2	2	0	1	0	0	0	0	0	0	0	0	1	0	1	0	1	0	1	0	4
1048	0	69	2	3	1	1	99	1	2	1	1	0	0	0	1	0	0	0	0	0	0	0	0	1	0	0	0	0	0	1
1049	0	69	2	3	2	2	1	1	2	3	2	0	0	1	0	0	0	0	0	0	0	1	0	1	0	0	0	2	1	5
1050	0	69	2	3	1	1	1	1	3	1	1	0	0	1	1	0	0	0	0	0	0	99	3	3	3	3	0	1	1	113
1051	1	69	2	3	1	1	1	1	3	1	2	0	1	0	0	0	0	0	0	0	0	1	1	1	0	0	0	1	0	4
1052	0	69	1	3	1	1	2	1	1	2	2	0	1	0	0	0	0	0	0	0	0	1	1	1	1	1	0	0	0	5
1053	1	69	1	3	1	2	1	1	2	2	2	0	1	0	0	0	0	0	0	0	0	0	0	0	0	0	0	0	0	0
1054	0	69	1	3	1	1	1	1	2	2	2	0	1	1	0	0	0	0	0	0	0	0	0	0	0	0	0	0	1	1
1055	0	69	2	5	1	1	1	1	2	1	1	0	1	0	0	0	0	0	0	0	0	1	1	2	1	1	0	1	1	8
1056	1	69	1	3	1	1	99	1	3	99	2	0	1	0	0	0	0	0	0	0	0	1	1	0	0	0	1	3	0	6
1057	0	69	1	3	1	1	1	1	2	2	2	0	1	0	1	0	0	0	0	0	0	0	0	0	0	0	99	99	1	199
1058	0	69	1	3	1	1	1	1	2	2	1	0	1	0	0	0	0	0	0	0	0	0	0	1	0	0	0	0	0	1
1059	1	69	1	3	1	1	1	1	2	2	1	0	1	0	0	0	0	0	0	0	0	0	0	0	0	0	0	0	0	0
1060	0	69	1	3	1	1	1	1	1	2	2	0	1	0	0	0	0	0	0	0	0	0	0	0	0	0	0	0	1	1
1061	0	69	2	5	1	1	1	1	1	1	2	0	1	1	0	0	0	0	0	0	0	1	0	2	1	1	0	1	1	7
1062	0	69	1	3	1	1	2	1	2	2	2	0	1	0	0	0	0	0	0	0	0	0	0	0	0	0	0	0	1	1
1063	0	69	1	3	1	1	1	1	1	2	1	0	1	0	0	0	0	0	0	0	0	1	0	1	0	1	0	0	0	3
1064	1	69	2	3	3	2	2	2	2	1	2	0	0	0	0	0	0	1	0	0	0	3	2	3	2	2	3	3	2	20
1065	1	69	2	3	3	2	2	2	3	1	3	1	1	0	0	0	0	0	0	0	0	1	1	1	1	1	1	1	1	8
1066	0	69	1	3	1	1	1	1	2	2	2	0	0	1	0	0	0	0	0	0	0	0	0	0	0	0	0	99	1	100
1067	1	69	2	5	6	1	2	2	3	1	3	1	0	0	0	0	0	0	0	0	0	1	1	1	1	1	1	1	1	8
1068	1	69	1	5	1	1	2	2	2	2	2	0	1	0	0	0	0	0	0	0	0	0	0	0	0	0	0	0	0	0
1069	0	69	1	3	1	1	1	2	2	2	99	0	1	1	0	0	0	0	0	0	0	0	0	0	0	0	0	0	0	0
1070	0	69	2	1	3	2	1	2	2	1	2	0	1	0	0	0	0	0	0	0	0	0	0	0	0	0	0	1	1	2
1071	0	69	1	3	2	2	2	2	3	2	2	0	1	0	0	0	0	0	0	0	0	2	2	1	1	1	1	3	2	13
1072	1	69	1	3	1	1	2	1	2	2	1	0	1	1	0	0	0	0	0	0	0	0	0	0	0	0	1	0	1	2
1073	1	69	1	3	1	1	1	1	2	2	1	0	1	1	0	0	0	0	0	0	0	0	0	0	0	0	0	1	0	1
1074	1	69	2	5	3	2	2	2	3	1	3	0	1	0	0	0	0	0	0	0	0	1	1	1	1	1	1	2	1	9
1075	0	69	2	3	1	1	1	2	3	1	2	0	1	1	0	0	0	0	0	0	0	1	1	1	1	1	0	1	1	7
1076	0	69	1	3	1	1	1	1	2	2	2	0	1	1	0	0	0	0	0	0	0	1	1	1	1	1	0	1	1	7
1077	1	69	1	3	1	1	1	1	2	2	2	0	1	0	0	0	0	1	0	0	0	1	2	2	2	2	1	1	2	13
1078	0	69	1	3	1	1	1	1	2	2	2	0	1	0	0	0	0	0	0	0	0	0	1	0	0	1	0	0	1	3
1079	0	69	1	3	2	2	1	1	2	2	2	0	1	0	0	0	0	0	0	0	0	0	1	1	1	1	0	0	1	5
1080	0	69	1	3	1	1	99	2	2	99	2	0	1	0	0	0	0	0	0	0	0	1	1	1	0	1	0	0	1	5
1081	1	69	1	3	1	1	2	1	2	2	2	0	1	1	0	0	0	0	0	0	0	0	0	1	1	1	0	2	1	6
1082	0	69	1	3	1	1	1	1	2	2	2	0	1	1	0	0	0	0	0	0	0	1	1	1	1	1	0	0	1	6
1083	1	69	1	5	1	1	1	1	2	2	2	0	1	0	0	0	0	0	0	0	0	1	0	0	0	0	0	0	1	2
1084	1	69	1	1	1	1	1	1	2	2	1	0	1	0	0	0	0	0	0	0	0	0	0	0	0	0	0	0	0	0
1085	1	69	1	3	1	1	1	1	2	2	3	0	1	1	0	0	0	0	0	0	0	0	0	0	0	0	0	0	0	0
1086	0	69	1	3	2	1	1	1	2	2	3	0	1	0	0	0	0	0	0	0	1	1	0	0	99	99	1	1	1	202
1087	1	69	2	3	3	2	2	1	2	1	2	0	1	1	0	1	0	0	0	0	0	1	0	1	1	0	0	0	0	3
1088	1	69	1	3	1	1	2	1	2	2	2	0	1	0	0	0	0	0	0	0	0	99	0	1	0	0	0	0	1	101
1089	0	69	1	1	1	1	1	1	2	2	1	0	1	0	0	0	0	0	0	0	0	0	1	1	1	1	1	1	1	7
1090	1	69	2	3	2	1	1	1	3	1	2	1	0	1	0	0	0	0	0	0	0	1	0	1	1	1	1	1	1	7
1091	1	69	1	3	1	1	2	1	2	2	2	0	1	0	0	0	0	0	0	0	0	0	0	0	0	0	0	0	1	1
1092	1	69	1	3	1	1	1	1	2	1	2	0	1	0	0	0	0	0	0	0	0	2	1	1	2	2	0	1	1	10
1093	0	69	1	3	6	1	1	1	3	2	1	0	1	0	0	0	0	0	0	0	0	0	1	0	0	0	0	0	1	2
1094	1	69	1	3	1	1	1	1	3	2	1	0	1	0	0	0	0	0	0	0	0	0	0	1	0	0	0	1	1	3
1095	1	69	1	3	1	1	1	1	3	2	99	0	1	0	0	0	0	0	0	0	0	0	0	0	0	0	1	0	1	2
1096	0	69	1	3	3	2	1	1	3	2	2	0	1	0	0	0	0	0	0	0	0	1	0	1	0	0	0	0	1	3
1097	1	69	2	5	3	3	2	1	2	1	2	0	0	1	0	0	0	0	0	0	0	0	0	1	0	0	0	1	1	3
1098	0	69	2	5	2	2	2	2	2	1	3	0	0	0	0	0	0	0	0	1	0	1	1	1	2	1	0	2	1	9
1099	1	69	1	3	2	2	1	2	2	2	2	0	1	1	0	1	0	1	0	0	0	0	1	1	1	1	0	0	1	5
1100	0	69	1	3	1	1	1	1	2	2	2	0	1	0	0	0	0	0	0	0	0	1	0	0	1	1	0	1	1	5
1101	1	69	1	3	1	1	1	1	2	2	2	0	1	0	0	0	0	0	0	0	0	0	0	0	0	1	0	0	1	2
1102	1	69	1	3	1	1	2	2	2	2	1	0	1	0	0	0	0	0	0	0	0	0	0	0	0	0	0	0	0	0
1103	0	69	1	3	1	1	1	1	2	2	2	0	1	0	0	0	0	0	0	0	0	0	0	1	0	0	0	0	1	2
1104	0	69	1	1	1	1	1	1	2	2	1	0	1	0	0	0	0	0	0	0	0	0	0	0	1	1	0	0	1	3
1105	0	69	1	3	2	2	1	1	2	2	3	0	1	0	0	0	0	0	0	0	0	1	0	0	1	1	0	1	1	5
1106	0	69	1	3	2	1	1	2	2	2	2	0	1	1	0	1	0	0	0	0	0	0	0	0	1	1	1	1	1	5
1107	1	69	1	3	1	1	1	1	2	2	1	0	1	0	0	0	0	0	0	0	0	0	1	1	0	0	0	1	1	4
1108	0	69	1	3	1	1	1	1	2	2	1	0	1	0	0	0	0	1	0	1	0	0	0	0	0	0	0	0	1	1
1109	0	69	1	3	2	1	1	1	2	2	2	0	1	0	0	0	0	0	0	0	0	0	0	0	1	1	0	0	1	3
1110	0	69	1	3	2	1	2	1	3	2	2	0	1	0	0	0	0	0	0	0	0	3	1	1	1	0	0	1	1	8
1111	1	69	1	5	1	1	1	1	3	2	1	0	1	0	0	0	0	0	0	0	0	2	1	2	1	2	1	0	1	10
1112	0	69	1	5	3	2	1	1	2	2	1	0	1	0	0	0	0	0	0	0	0	0	0	1	0	0	0	0	1	2
1113	1	69	1	3	2	2	1	1	2	2	2	0	1	0	0	0	0	0	0	0	0	0	0	1	0	1	0	1	1	4
1114	1	69	1	3	1	1	1	1	2	2	2	0	1	0	0	0	0	0	0	0	0	0	0	0	0	0	0	0	1	1
1115	0	69	1	3	3	1	1	1	2	2	2	0	1	1	1	0	0	0	0	0	0	1	0	0	1	0	0	1	1	4
1116	0	69	2	3	2	2	1	1	2	1	2	0	0	0	0	0	1	0	0	1	1	2	1	1	1	1	0	1	1	8
1117	1	69	1	3	2	1	99	1	2	99	3	0	1	0	0	0	0	0	0	0	0	0	0	0	0	0	0	0	0	0
1118	0	69	1	3	1	1	99	1	2	99	1	0	0	1	0	0	0	0	0	0	0	0	0	0	0	1	0	0	0	1
1119	0	69	1	1	1	1	1	1	2	2	2	1	0	0	0	0	0	0	0	0	0	2	3	2	2	2	1	2	2	16
1120	0	69	1	3	2	2	1	99	3	2	2	0	1	1	0	0	0	0	0	0	0	2	1	1	1	1	1	2	2	11
1121	0	69	1	3	1	1	1	1	2	2	1	0	1	1	0	0	0	0	0	0	1	1	0	0	1	0	0	0	0	2
1122	0	69	1	3	1	1	1	1	1	2	99	0	1	1	0	0	0	0	0	1	0	1	0	1	1	1	99	99	1	203
1123	0	69	1	3	1	2	1	1	2	2	2	0	1	0	0	0	0	0	0	0	0	1	0	1	1	1	1	0	0	5
1124	0	69	1	3	1	1	1	1	1	2	2	0	1	0	0	0	0	0	0	0	0	1	0	0	1	1	0	1	2	6
1125	1	69	1	3	1	1	1	1	2	2	2	0	1	0	0	0	0	0	0	0	0	0	0	1	0	0	0	0	0	1
1126	0	69	1	3	3	1	1	1	2	1	2	0	1	1	0	0	0	0	0	0	0	2	0	1	1	1	1	1	1	8
1127	1	69	2	1	4	2	1	1	2	1	2	0	0	1	0	0	0	0	0	0	0	1	0	0	1	1	1	1	1	6
1128	0	69	1	1	4	1	1	1	3	1	1	0	1	1	1	0	0	1	0	0	0	0	0	99	0	0	1	1	0	101
1129	0	69	1	3	1	1	1	2	2	2	2	1	0	0	0	0	0	0	0	0	0	1	1	1	1	1	0	1	2	8
1130	1	69	1	3	1	1	1	2	3	2	2	0	1	0	0	0	0	0	0	0	0	1	0	1	1	1	1	0	1	6
1131	0	69	1	3	1	1	1	1	2	2	2	0	1	1	0	0	0	0	0	0	0	0	0	0	0	0	0	0	1	1
1132	1	69	1	3	1	1	1	1	2	2	2	99	99	99	99	99	99	99	99	99	99	0	0	0	0	0	0	0	0	0
1133	0	69	1	5	3	2	1	1	2	2	2	0	1	1	0	0	0	0	1	0	0	1	0	0	0	0	0	0	0	1
1134	1	69	1	3	1	1	2	1	2	2	2	0	1	0	0	0	0	0	0	0	0	1	0	1	1	1	0	1	1	6
1135	1	69	1	3	3	2	1	2	1	1	2	1	1	0	0	0	0	0	0	0	0	0	1	1	1	1	0	1	0	5
1136	0	69	1	3	3	2	1	2	2	2	3	0	0	1	0	0	0	0	0	0	0	1	0	1	0	0	0	0	1	3
1137	0	69	1	3	2	1	1	1	2	2	2	0	1	0	0	0	0	0	0	0	0	1	0	1	0	1	1	1	1	6
1138	0	69	1	3	2	2	1	1	2	2	1	0	1	1	0	0	0	0	0	0	0	2	99	0	1	2	0	0	0	104
1139	0	69	1	5	3	2	1	1	2	1	1	0	1	1	0	1	0	0	0	0	0	0	0	1	1	0	1	1	0	4
1140	0	69	2	3	2	2	1	1	2	1	2	0	0	0	0	0	0	0	0	0	1	0	0	0	0	0	0	0	0	0
1141	0	69	1	3	1	1	1	1	2	2	2	0	1	0	0	0	0	0	0	0	0	0	0	0	1	0	0	1	1	3
1142	0	69	1	3	1	1	1	1	2	2	2	0	0	1	0	0	0	0	0	0	0	0	1	2	1	1	2	2	2	11
1143	1	69	1	3	1	1	1	2	2	2	1	0	1	1	0	0	0	1	0	1	0	0	0	0	0	0	0	0	0	0
1144	0	69	1	3	1	1	2	2	2	1	2	0	0	0	0	0	0	0	0	0	1	1	1	1	0	1	1	2	1	8
1145	0	69	2	5	3	1	1	99	3	1	1	0	0	1	0	0	0	1	0	1	0	2	1	1	1	1	1	1	1	9
1146	1	69	1	3	1	1	1	1	2	2	2	0	1	1	0	0	0	0	0	0	0	0	0	0	0	1	0	1	1	3
1147	1	69	1	3	1	1	2	1	2	2	2	0	1	0	0	0	0	0	0	0	0	1	0	0	0	0	0	0	0	1
1148	1	69	1	3	1	1	1	1	2	2	2	0	1	0	0	0	0	0	0	0	0	0	0	0	0	0	0	0	0	0
1149	0	69	1	3	1	1	1	1	2	2	1	0	1	0	0	0	0	0	0	0	0	0	0	0	0	0	0	0	1	1
1150	0	69	2	3	3	2	1	1	3	1	1	0	1	1	0	0	0	0	0	0	0	3	2	1	99	2	0	2	2	111
1151	0	69	1	3	2	1	1	1	2	2	2	0	1	0	0	0	0	0	0	0	0	0	0	0	1	1	0	0	1	3
1152	1	69	1	1	4	1	1	1	2	2	2	1	0	0	0	0	0	0	0	0	0	1	1	1	0	1	0	0	0	4
1153	0	69	1	3	2	3	2	1	2	1	2	0	1	0	0	0	0	0	0	0	0	0	0	0	0	0	0	0	0	0
1154	1	69	1	3	1	1	1	2	3	2	2	0	1	1	0	0	0	1	0	0	0	2	0	1	1	1	0	1	1	7
1155	1	69	1	3	1	1	1	1	2	2	99	99	99	99	99	99	99	99	99	99	99	0	1	2	1	1	99	99	99	302
1156	0	69	1	3	1	2	99	2	2	2	2	99	99	99	99	99	99	99	99	99	99	3	1	1	1	1	0	1	0	8
1157	0	69	1	3	6	1	1	1	2	2	2	0	1	1	0	0	0	0	0	0	0	0	0	1	1	1	0	1	1	5
1158	1	69	2	3	1	1	1	1	2	1	1	1	0	0	0	0	0	0	0	0	0	0	0	0	1	1	1	0	0	3
1159	0	69	1	1	1	1	2	1	3	2	2	0	1	1	1	0	0	0	0	0	0	0	2	1	1	1	1	2	2	10
1160	1	69	2	1	3	1	1	2	2	1	3	0	0	0	1	0	0	0	0	0	0	0	1	2	2	1	0	0	1	7
1161	0	69	1	3	2	1	1	1	2	2	2	0	1	0	0	0	0	0	0	0	0	0	0	0	0	0	0	0	1	1
1162	1	69	2	3	1	2	1	1	2	1	2	0	1	0	0	1	0	0	0	0	0	1	0	0	1	0	0	1	1	4
1163	1	69	1	3	2	1	1	1	2	1	2	0	1	0	0	0	0	0	0	0	0	0	0	1	0	0	0	0	1	2
1164	1	69	2	3	1	2	1	1	2	1	1	0	0	0	1	0	0	0	0	0	0	1	0	1	0	0	0	0	1	3
1165	0	69	1	3	1	1	99	1	2	99	2	0	1	1	0	1	0	0	0	0	0	1	0	1	1	1	0	0	1	5
1166	0	69	1	3	1	2	1	1	2	2	2	0	1	1	0	0	0	0	0	0	0	1	0	1	1	2	0	0	2	7
1167	1	69	2	5	3	2	1	2	3	1	2	0	1	0	0	0	0	0	0	0	0	2	1	0	1	1	0	1	2	8
1168	1	69	1	3	1	1	2	1	2	2	2	0	1	0	0	0	0	0	0	0	0	0	0	1	0	0	0	0	1	2
1169	0	69	2	3	5	2	1	1	2	99	1	0	1	1	0	0	0	0	1	0	0	0	0	0	0	0	0	0	1	1
1170	1	70	2	3	3	2	2	2	3	1	2	0	0	0	0	0	0	0	0	0	1	2	2	0	1	1	1	2	2	11
1171	0	70	1	3	1	1	1	1	2	2	1	0	1	1	0	0	0	1	0	0	0	0	0	1	0	0	0	0	0	1
1172	1	70	1	3	1	2	1	1	1	2	99	0	1	1	0	0	0	0	0	0	0	0	0	1	0	0	0	0	1	2
1173	0	70	1	3	1	1	1	1	2	2	1	0	1	0	0	0	0	0	0	0	0	1	0	0	1	1	0	0	1	4
1174	0	70	2	3	1	1	1	1	1	1	2	0	1	1	0	0	0	0	0	0	0	0	0	0	1	1	0	0	1	3
1175	1	70	1	3	1	1	2	1	2	2	1	0	1	0	0	0	0	0	0	0	0	1	0	0	0	0	0	1	1	3
1176	1	70	1	3	1	1	1	1	2	2	2	0	1	0	0	0	0	0	0	0	0	0	0	1	1	1	0	0	1	4
1177	1	70	1	1	1	1	2	1	2	2	2	0	1	0	0	0	0	0	0	0	0	1	1	1	1	1	1	2	1	9
1178	0	70	1	3	1	1	1	1	2	2	2	0	0	1	0	0	0	0	0	0	0	1	2	1	2	2	1	2	1	12
1179	1	70	1	3	6	2	1	1	2	2	2	0	1	0	0	0	0	0	0	0	0	0	0	0	0	0	0	0	0	0
1180	0	70	1	3	1	1	1	1	2	2	2	0	1	1	0	0	0	0	0	0	0	0	0	1	1	1	0	0	1	4
1181	0	70	1	3	1	1	1	1	2	2	2	0	1	1	0	0	0	0	0	0	0	0	0	0	0	0	0	0	1	1
1182	0	70	1	3	2	1	1	2	2	2	1	0	0	1	0	0	0	0	0	0	0	0	0	1	0	0	0	0	0	1
1183	1	70	1	3	2	1	1	1	2	2	1	0	1	1	0	0	0	0	0	0	0	0	0	0	0	0	0	0	0	0
1184	0	70	2	5	3	2	1	1	2	1	2	0	1	1	1	0	0	0	0	0	0	0	0	1	0	0	0	0	1	2
1185	0	70	1	3	1	1	1	1	2	2	2	0	1	0	0	0	0	0	0	0	0	1	0	1	1	1	0	0	0	4
1186	0	70	1	3	1	1	1	1	2	2	2	0	1	1	0	0	0	0	0	0	0	0	0	0	0	0	0	0	1	1
1187	1	70	1	3	2	2	2	1	1	2	2	0	1	0	0	0	0	0	0	0	0	0	0	0	0	0	0	1	1	2
1188	1	70	1	3	1	2	1	1	2	2	3	0	1	0	0	0	0	0	0	0	0	1	0	1	0	1	0	0	1	4
1189	0	70	1	3	1	1	1	1	2	2	1	0	1	1	0	0	0	0	0	0	0	0	0	0	0	0	0	0	0	0
1190	1	70	1	3	1	1	1	1	3	2	1	0	1	0	0	0	0	0	0	0	0	2	1	1	1	1	0	2	2	10
1191	0	70	1	3	3	2	1	1	2	2	2	0	1	1	0	0	0	0	0	0	0	0	0	1	0	0	0	0	1	2
1192	0	70	1	3	1	1	1	1	2	2	2	0	1	0	0	0	0	0	0	0	0	2	1	1	1	1	0	0	1	7
1193	0	70	1	3	1	1	1	1	3	2	2	0	1	0	1	0	0	0	0	0	0	0	0	0	0	0	0	1	1	2
1194	1	70	1	3	2	1	1	1	3	2	2	0	1	0	0	0	0	0	0	0	0	1	0	1	0	0	1	1	1	5
1195	0	70	1	3	1	1	1	1	2	2	2	0	1	0	0	0	0	0	0	0	0	0	0	0	2	1	0	1	1	5
1196	0	70	1	3	1	1	1	1	2	2	2	0	1	0	0	0	0	0	0	0	0	0	0	0	0	0	0	0	0	0
1197	1	70	1	3	1	1	2	99	2	1	2	0	1	1	0	0	0	0	0	0	0	2	0	1	99	1	99	1	1	204
1198	0	70	1	3	1	2	1	1	2	2	2	0	1	1	1	0	0	0	0	0	0	0	0	2	1	1	1	1	0	6
1199	0	70	2	3	1	1	1	2	2	1	1	0	1	1	1	0	0	0	0	0	0	1	2	1	2	2	0	1	1	10
1200	1	70	1	3	3	2	1	1	1	2	2	0	1	0	0	0	0	0	0	0	0	1	0	1	0	1	0	1	1	5
1201	0	70	2	3	1	1	1	1	2	1	3	0	1	1	0	0	0	1	0	0	0	1	0	1	0	0	0	0	1	3
1202	1	70	1	3	1	1	2	2	2	2	2	0	1	0	0	0	0	0	0	0	0	0	0	0	0	0	0	0	1	1
1203	0	70	1	3	2	2	1	2	3	2	2	0	1	1	0	0	0	0	0	0	0	0	0	0	0	0	0	2	1	3
1204	0	70	1	3	2	1	2	1	3	2	2	0	1	0	0	0	0	0	0	0	0	2	1	2	1	1	1	1	2	11
1205	1	70	1	3	1	1	2	1	3	2	2	1	0	0	0	0	0	0	0	0	0	0	0	1	0	0	0	1	1	3
1206	1	70	1	3	1	1	1	1	2	2	2	0	1	0	0	0	0	0	0	0	0	0	0	0	0	0	0	0	0	0
1207	0	70	2	3	1	1	1	1	2	2	1	0	1	0	0	0	0	0	0	0	0	0	0	1	0	0	0	0	1	2
1208	1	70	1	3	1	1	1	1	3	2	2	0	1	1	0	0	0	1	0	0	0	1	1	1	0	1	0	0	0	4
1209	0	70	1	3	2	3	1	1	2	2	3	0	1	0	0	0	0	0	0	0	0	1	0	0	1	1	0	1	0	4
1210	1	70	1	3	1	1	1	1	2	2	2	0	1	0	0	0	0	0	0	0	0	1	2	1	0	1	1	2	2	10
1211	0	70	1	3	1	1	1	1	2	2	1	0	1	1	0	0	0	0	0	0	0	1	0	0	1	1	1	1	1	6
1212	0	70	2	3	1	1	1	1	2	1	3	0	1	1	0	0	0	0	0	0	0	1	1	2	1	2	1	2	1	11
1213	0	70	1	3	1	1	2	2	3	2	1	0	0	1	0	0	0	0	0	0	0	2	1	1	1	1	2	2	1	11
1214	0	70	2	3	1	3	1	2	3	1	2	0	1	0	0	0	0	0	0	0	0	2	1	1	2	1	0	1	1	9
1215	1	70	1	3	1	1	1	1	2	2	3	0	0	1	0	0	0	0	0	0	0	0	0	1	0	1	0	1	0	3
1216	1	70	1	3	1	1	1	1	2	2	1	0	1	0	0	0	0	0	0	0	0	0	0	0	0	0	0	0	1	1
1217	0	70	2	3	1	1	1	1	3	1	2	0	1	1	0	0	0	1	0	0	0	99	0	1	0	0	0	1	0	101
1218	0	70	1	3	2	2	1	1	2	2	2	0	1	1	0	0	0	0	0	0	0	0	0	0	1	0	0	0	1	2
1219	0	70	1	3	2	3	1	1	2	2	2	0	1	0	0	0	0	0	0	0	0	1	0	0	0	0	0	0	0	1
1220	0	70	1	3	1	1	1	1	2	2	2	0	1	1	0	0	0	0	0	0	0	1	0	0	0	0	0	0	1	2
1221	1	70	1	3	1	1	1	1	2	2	1	0	1	0	0	0	0	0	0	0	0	1	99	2	1	2	0	1	1	107
1222	0	70	1	3	1	1	1	1	2	2	3	0	1	1	0	0	0	0	0	0	0	0	0	0	0	0	0	0	1	1
1223	0	70	1	3	4	2	1	1	2	2	2	0	1	0	0	0	0	0	0	0	0	0	0	1	0	1	0	0	1	3
1224	1	70	1	3	1	1	1	1	2	2	2	1	0	0	0	0	0	0	0	0	0	0	0	99	0	0	0	0	0	99
1225	0	70	1	3	2	2	1	1	3	2	2	1	0	0	0	0	0	0	0	0	0	2	2	2	2	2	1	1	1	13
1226	0	70	1	3	6	1	1	2	2	2	1	0	1	0	0	0	0	1	0	0	0	0	0	0	0	0	1	1	1	3
1227	0	70	1	3	1	1	1	1	3	2	3	0	1	0	0	0	0	0	0	0	0	2	2	2	1	1	1	1	1	11
1228	0	70	2	5	1	1	1	1	2	1	1	0	0	1	1	0	0	1	0	1	1	1	1	0	0	2	1	2	2	9
1229	0	70	1	3	1	1	1	1	2	2	1	0	1	1	0	0	0	0	1	0	0	1	1	2	1	1	1	1	1	9
1230	0	70	1	1	1	1	1	1	2	2	1	0	1	1	0	0	0	0	0	0	0	1	0	0	0	0	0	0	1	2
1231	0	70	2	3	3	2	1	1	2	1	1	0	0	1	0	0	0	0	0	0	0	0	0	0	0	0	0	0	0	0
1232	0	70	1	3	1	1	2	2	3	2	2	0	1	0	0	0	0	0	0	0	0	2	2	0	3	3	3	3	0	16
1233	0	70	2	3	3	2	1	99	99	1	2	0	0	1	0	0	0	0	0	0	0	99	99	99	99	99	0	0	1	496
1234	1	70	1	3	1	1	1	1	1	2	1	0	1	0	0	0	0	0	0	0	0	0	0	0	0	0	0	0	1	1
1235	0	70	1	3	1	1	1	2	2	2	1	0	1	0	0	0	0	0	0	0	0	1	2	1	2	2	0	0	1	9
1236	0	70	1	3	1	2	1	1	2	2	2	0	1	1	0	0	0	0	0	0	0	99	0	1	1	1	0	0	1	103
1237	1	70	1	3	1	1	1	1	1	2	1	0	1	0	0	0	0	0	0	0	0	0	0	1	1	1	0	0	1	4
1238	0	70	1	3	1	2	1	1	2	2	3	0	1	0	0	0	0	0	0	0	0	0	0	0	1	0	0	0	1	2
1239	0	70	1	3	1	1	1	1	2	2	1	0	1	0	0	0	0	0	0	0	0	1	0	1	0	1	0	0	1	4
1240	1	70	2	3	1	2	1	1	2	1	3	0	1	0	0	0	0	0	0	0	0	99	99	99	0	0	0	0	1	298
1241	0	70	1	3	1	1	1	1	1	2	2	0	1	1	0	0	0	0	0	0	0	2	2	2	1	1	0	0	1	9
1242	0	70	2	3	3	2	1	1	1	1	2	0	1	0	0	0	0	0	0	0	0	0	0	0	0	0	0	0	1	1
1243	0	70	1	3	2	2	1	2	2	2	2	0	0	0	0	1	0	0	0	0	0	0	2	2	2	2	2	2	1	13
1244	0	70	2	3	2	2	1	2	2	1	3	0	0	0	0	0	0	0	1	0	0	0	2	0	1	1	0	1	1	6
1245	0	70	2	3	1	1	1	1	2	1	2	0	1	1	1	0	0	0	0	0	0	0	0	0	1	0	1	0	1	3
1246	0	70	1	3	2	2	2	1	2	2	2	0	1	1	0	0	0	0	0	0	0	0	0	0	0	0	0	0	0	0
1247	1	70	2	3	2	1	1	1	2	1	2	0	0	1	0	0	0	0	0	0	0	0	0	99	0	1	0	0	0	100
1248	1	70	2	3	3	1	1	1	2	1	99	99	99	99	99	99	99	99	99	99	99	0	1	1	0	0	99	99	99	299
1249	0	70	1	3	1	1	1	1	2	2	1	0	1	0	0	0	0	1	0	0	0	1	0	1	0	1	1	1	0	5
1250	0	70	2	3	1	1	1	1	1	1	2	0	1	1	0	0	0	0	0	0	0	1	0	1	0	0	0	0	1	3
1251	1	70	1	3	1	1	1	1	2	2	1	1	0	0	0	0	0	0	0	0	0	2	0	0	1	1	0	0	0	4
1252	1	70	1	3	2	2	1	1	2	2	2	0	0	1	0	0	0	0	0	0	0	0	1	0	0	0	1	1	1	4
1253	0	70	1	3	3	1	1	1	2	2	1	0	1	0	0	1	0	0	0	0	0	0	0	1	0	0	0	0	1	2
1254	0	70	2	1	3	2	2	1	2	1	2	0	1	1	0	0	0	0	0	0	0	1	0	0	0	1	1	1	1	5
1255	0	70	2	3	2	1	2	2	2	1	2	0	0	1	1	0	0	0	0	0	0	0	1	0	0	1	0	0	1	3
1256	0	70	2	3	3	1	2	2	2	1	2	0	0	0	1	0	0	0	0	0	0	1	0	0	0	0	0	0	1	2
1257	0	70	1	3	1	1	2	1	1	2	2	0	1	0	0	0	0	0	0	0	0	0	0	0	2	0	1	2	1	6
1258	0	70	2	3	3	2	1	1	3	1	1	0	0	1	0	0	0	0	0	0	1	99	99	99	0	0	0	0	1	298
1259	0	70	1	1	1	1	1	1	2	2	2	0	1	0	1	0	0	0	0	0	0	0	0	0	0	0	0	0	1	1
1260	1	70	1	3	1	1	1	1	3	2	2	1	0	0	0	0	0	0	0	0	0	1	0	2	1	1	1	2	2	10
1261	0	70	1	3	1	1	1	2	3	2	1	0	1	1	1	0	0	1	0	0	0	2	1	2	2	1	2	1	1	12
1262	0	70	1	3	1	1	1	1	2	2	2	0	1	0	0	0	0	0	0	0	0	0	0	0	0	0	1	1	1	3
1263	1	70	1	3	1	2	1	1	2	2	2	0	1	0	0	0	0	0	0	0	0	0	0	0	0	1	1	0	1	3
1264	0	70	1	3	2	1	1	1	2	2	1	0	1	1	1	0	0	0	0	0	0	0	0	0	0	0	0	0	1	1
1265	1	70	2	5	3	2	1	1	2	1	3	0	0	0	0	0	0	0	0	0	1	0	0	0	0	1	0	0	1	2
1266	0	70	1	3	3	2	1	1	2	2	2	0	1	1	0	0	0	1	0	0	0	1	0	1	1	1	0	0	1	5
1267	0	70	1	3	3	2	1	1	2	2	1	0	1	1	0	0	0	0	0	0	0	1	0	1	1	1	0	0	1	5
1268	0	70	1	3	3	2	1	1	3	2	2	0	1	1	0	0	0	0	0	0	0	1	2	2	2	2	2	2	2	15
1269	1	70	2	3	2	3	1	1	2	1	2	1	0	0	0	0	0	0	0	0	0	2	2	2	1	2	2	2	1	14
1270	1	70	1	3	1	1	1	2	2	2	2	0	1	0	0	0	0	0	0	0	0	1	1	1	0	0	0	0	1	4
1271	0	70	1	1	1	1	1	1	2	2	2	0	1	0	0	0	0	0	0	0	0	0	0	1	1	1	0	0	1	4
1272	1	70	2	5	3	2	1	2	3	1	99	99	99	99	99	99	99	99	99	99	99	1	0	1	1	1	99	99	99	301
1273	1	70	1	1	1	1	1	1	2	2	1	0	1	0	0	0	0	0	0	0	0	1	0	1	1	1	0	1	1	6
1274	1	70	1	1	1	1	1	1	2	2	1	0	1	0	0	0	0	0	0	0	0	0	0	0	0	0	0	0	1	1
1275	0	70	1	3	1	1	1	1	2	2	1	0	1	0	0	0	0	0	0	0	0	0	0	0	0	0	0	0	1	1
1276	0	70	1	3	1	1	1	1	2	2	1	0	1	1	1	0	0	0	0	0	0	0	0	0	0	0	0	1	1	2
1277	1	70	1	3	1	1	99	99	99	99	99	99	99	99	99	99	99	99	99	99	99	99	99	99	99	99	99	99	99	792
1278	1	70	1	3	1	2	2	1	3	2	2	0	1	0	0	0	0	0	0	0	0	1	1	1	1	1	1	2	2	10
1279	0	70	2	3	2	2	1	1	2	1	3	1	0	0	0	0	0	0	0	0	0	1	0	1	1	1	1	1	1	7
1280	0	70	2	3	3	2	1	2	2	1	1	1	0	0	0	0	0	0	0	0	0	1	0	0	0	1	0	0	1	3
1281	1	70	1	3	3	2	2	1	2	2	99	99	99	99	99	99	99	99	99	99	99	0	0	0	0	0	99	99	99	297
1282	1	70	1	3	4	1	1	1	2	99	2	0	0	0	0	0	0	0	0	0	1	0	0	2	0	1	0	0	2	5
1283	1	70	1	3	2	2	1	1	2	2	2	0	1	0	0	0	0	0	0	0	0	1	0	0	0	0	0	0	1	2
1284	0	70	1	3	1	1	1	1	2	2	2	0	1	1	0	0	0	0	0	0	0	99	1	0	1	1	0	1	1	104
1285	0	70	2	5	3	2	1	1	3	1	2	0	1	0	0	0	0	0	0	0	0	1	0	1	1	1	1	2	2	9
1286	0	70	2	3	2	1	1	1	2	1	1	0	0	0	0	0	0	1	0	0	1	1	1	3	0	1	2	3	1	12
1287	0	70	2	3	1	1	1	1	2	1	1	0	1	1	0	0	0	1	0	0	0	1	1	0	0	1	0	0	1	4
1288	1	70	1	3	1	1	1	1	2	2	1	0	1	1	0	0	0	0	0	0	0	0	0	1	0	0	0	0	1	2
1289	1	70	1	3	2	1	2	1	2	2	1	99	0	99	99	99	99	99	99	99	99	1	1	1	1	1	0	0	1	6
1290	1	70	1	1	1	1	1	1	2	2	1	0	1	0	0	0	0	1	0	0	0	0	0	0	0	0	0	0	0	0
1291	0	70	2	3	3	2	2	1	2	1	1	0	1	0	0	0	0	0	0	0	0	1	1	1	1	0	99	99	1	203
1292	0	70	1	1	1	1	1	1	2	2	1	0	0	1	0	0	0	0	0	0	0	1	0	1	0	0	0	0	1	3
1293	1	70	2	3	2	2	1	1	2	1	1	0	0	1	0	0	0	0	0	0	0	0	0	0	0	0	0	0	0	0
1294	0	70	1	3	3	2	1	1	1	2	2	0	1	0	0	0	0	0	0	0	0	0	0	0	0	0	0	0	1	1
1295	1	70	1	3	1	1	1	1	2	2	2	0	0	1	0	0	0	0	0	0	0	0	0	0	1	1	0	0	1	3
1296	0	70	1	1	1	1	1	1	2	2	1	0	0	1	1	0	0	0	0	0	0	0	0	0	0	0	0	0	0	0
1297	0	70	1	3	1	1	1	1	1	2	1	0	1	0	0	0	0	0	0	0	0	0	0	0	0	0	0	0	0	0
1298	0	70	1	3	1	1	2	1	2	2	3	1	1	0	0	0	0	0	0	0	0	1	0	0	1	1	0	1	1	5
1299	0	70	1	3	1	1	99	1	2	99	2	0	1	0	0	0	0	0	0	0	0	1	1	1	0	0	1	2	2	8
1300	0	70	1	3	1	1	1	1	2	2	1	0	1	1	0	0	0	0	0	0	0	0	0	0	0	0	0	0	0	0
1301	0	70	1	3	1	1	1	1	2	2	2	0	1	1	1	0	0	0	0	0	0	0	0	0	0	0	0	0	0	0
1302	1	70	1	3	1	1	1	1	2	2	1	0	1	0	0	0	0	0	0	0	0	0	0	0	0	0	0	0	1	1
1303	0	70	1	3	1	1	1	1	2	2	1	0	1	1	0	0	0	0	0	0	0	0	0	0	0	0	0	0	1	1
1304	0	70	1	3	1	1	1	1	2	2	2	0	1	0	0	0	0	0	0	0	0	1	0	0	1	1	0	1	1	5
1305	1	70	1	3	1	1	1	1	2	2	3	0	1	0	0	0	0	0	0	0	0	1	1	1	1	1	0	0	1	6
1306	0	70	1	3	1	1	1	1	2	2	1	0	1	0	0	0	0	0	0	0	0	0	0	0	0	0	0	0	1	1
1307	1	70	1	3	2	1	1	2	3	2	3	0	1	1	0	0	0	0	0	0	0	2	1	2	0	1	0	0	1	7
1308	1	70	1	3	6	1	1	1	2	2	1	0	1	0	0	0	0	0	0	0	1	0	0	1	0	1	0	0	1	3
1309	0	70	1	3	1	1	1	1	2	2	2	0	1	1	0	0	0	0	0	0	0	0	0	0	0	1	0	0	1	2
1310	1	70	2	3	1	1	1	2	99	1	2	0	0	0	0	0	0	0	0	0	1	0	0	0	0	0	0	1	1	2
1311	0	70	2	3	2	2	1	1	2	1	1	0	1	0	0	0	0	0	0	0	0	1	2	2	1	2	1	1	1	11
1312	1	70	1	3	3	2	1	1	2	2	2	0	1	0	0	0	0	0	0	0	0	2	1	0	0	1	0	1	1	6
1313	1	70	2	3	3	2	1	1	2	1	1	0	1	0	1	0	0	0	0	0	0	0	0	0	0	0	0	0	0	0
1314	0	70	1	3	2	2	1	1	2	2	2	0	1	0	0	0	0	0	0	0	0	0	0	0	1	1	0	0	1	3
1315	1	70	2	3	2	2	2	2	3	1	2	1	0	0	0	0	0	0	0	0	0	3	2	3	2	2	2	3	2	19
1316	1	70	1	3	3	2	2	1	2	2	1	0	1	0	0	0	0	0	0	0	0	0	0	99	0	0	0	0	0	99
1317	1	70	1	3	3	2	1	1	2	2	2	0	1	1	0	0	0	0	0	0	0	1	0	1	1	1	0	0	1	5
1318	0	70	2	3	3	2	2	2	2	1	3	99	99	99	99	99	99	99	99	99	99	0	0	0	0	0	0	0	0	0
1319	0	70	2	3	1	1	1	1	2	1	2	0	0	1	0	0	0	0	0	0	0	2	1	1	1	1	1	1	1	9
1320	1	70	1	3	1	1	1	1	2	2	2	99	99	99	99	99	99	99	99	99	99	1	2	1	1	1	1	1	1	9
1321	1	70	1	3	2	2	1	1	2	2	2	0	1	0	0	0	0	0	0	0	0	0	0	0	0	0	0	0	0	0
1322	1	70	1	3	3	2	1	1	2	1	1	0	1	0	0	0	0	0	0	0	0	99	0	0	1	1	1	1	1	104
1323	0	70	1	3	1	1	1	1	2	2	2	0	1	1	1	0	0	0	0	0	0	0	1	3	1	1	0	0	1	7
1324	1	70	2	3	2	1	1	1	2	1	3	0	0	1	0	0	0	0	0	0	0	0	0	0	0	0	0	0	0	0
1325	0	70	2	3	2	1	1	1	2	1	1	99	99	99	99	99	99	99	99	99	99	0	0	0	0	0	0	0	1	1
1326	0	70	2	1	4	1	1	2	3	1	2	0	1	0	0	0	0	0	0	0	0	1	0	0	0	0	0	1	0	2
1327	0	70	1	3	1	2	2	2	2	2	2	0	1	1	0	0	0	0	0	0	0	0	0	0	0	0	0	3	1	4
1328	1	70	1	3	1	1	1	1	2	3	2	0	0	1	0	0	0	0	0	0	0	0	0	0	0	0	0	0	0	0
1329	1	70	1	3	1	1	2	1	2	2	1	0	0	1	0	1	0	0	0	0	0	0	1	0	0	1	0	1	0	3
1330	1	70	2	3	2	2	1	1	2	1	3	0	1	0	0	0	0	0	0	1	0	3	0	0	0	1	0	1	1	6
1331	0	70	1	3	1	1	1	1	2	1	1	0	1	1	0	0	0	0	0	0	0	0	0	0	0	1	1	1	1	4
1332	0	70	1	3	1	1	1	1	2	2	1	0	1	0	0	0	0	0	0	0	0	0	0	0	0	0	0	1	1	2
1333	1	70	1	3	1	1	1	1	2	2	2	0	1	0	0	0	0	1	1	0	0	1	0	0	0	0	1	3	1	6
1334	1	70	1	3	1	1	2	1	3	2	3	0	1	0	0	0	0	0	0	0	0	1	2	2	2	2	2	3	2	16
1335	1	70	1	1	1	1	2	1	3	2	2	0	1	0	0	0	0	0	0	0	0	0	0	1	0	1	0	0	1	3
1336	0	70	2	3	3	2	1	1	2	1	2	0	1	1	0	0	0	0	0	0	0	1	0	0	0	2	0	0	1	4
1337	0	70	1	3	1	1	1	1	2	2	3	0	1	0	0	0	0	0	0	0	0	1	1	1	1	1	0	1	2	8
1338	1	70	1	3	1	1	1	1	2	2	2	0	1	0	0	0	0	0	0	0	0	0	0	1	0	0	0	0	1	2
1339	0	70	1	3	1	1	1	1	2	2	2	0	1	1	0	0	0	0	0	0	0	1	0	1	0	1	0	1	1	5
1340	1	70	1	1	1	1	1	1	2	2	2	0	1	1	0	0	0	0	0	0	0	1	0	0	0	1	0	1	1	4
1341	0	70	1	3	1	1	1	1	3	2	1	0	1	1	0	0	0	0	0	0	0	1	0	0	1	1	0	0	1	4
1342	1	70	2	3	3	2	1	1	2	1	2	0	0	0	1	0	0	0	0	0	0	1	0	1	0	0	0	0	1	3
1343	1	70	1	3	1	1	1	1	2	2	1	0	1	1	0	1	0	0	0	0	0	0	0	0	0	0	0	0	1	1
1344	1	70	2	3	4	2	2	2	3	1	2	0	1	0	0	0	0	0	0	0	0	1	0	1	1	1	0	0	1	5
1345	0	70	1	3	1	1	1	1	2	2	1	0	1	0	0	0	0	0	0	0	0	0	0	0	1	1	1	1	1	5
1346	1	70	1	3	1	1	1	1	2	2	1	0	1	1	0	0	0	0	0	0	0	1	0	1	1	1	0	1	1	6
1347	1	70	1	3	2	2	2	1	3	1	2	0	1	0	0	0	0	0	0	0	0	1	0	1	1	1	0	1	1	6
1348	1	70	1	3	1	1	1	2	3	1	3	1	0	0	0	0	0	0	0	0	0	3	1	0	0	1	0	1	1	7
1349	0	70	1	3	3	3	1	1	2	2	2	0	1	0	0	0	0	0	0	0	0	0	0	0	0	0	0	0	1	1
1350	0	70	1	3	1	2	1	1	3	2	2	0	1	1	0	0	0	0	0	0	0	2	1	1	1	2	1	2	2	12
1351	0	70	1	3	2	2	2	1	2	2	2	0	1	0	0	0	0	0	0	0	0	0	1	0	0	1	0	0	1	3
1352	0	70	1	3	1	3	1	1	2	2	2	0	1	1	0	0	0	0	0	0	0	0	0	0	0	0	0	0	1	1
1353	0	70	1	3	1	1	1	1	1	2	1	0	1	0	0	0	0	0	0	0	0	0	0	1	0	0	0	1	1	3
1354	0	70	2	3	3	1	1	1	3	1	1	0	0	1	1	0	0	0	0	0	0	0	0	0	0	0	0	0	2	2
1355	0	70	1	1	1	2	1	2	3	2	1	0	1	1	0	0	0	0	0	0	0	1	0	1	0	0	1	0	1	4
1356	1	70	1	3	4	2	1	99	2	2	2	0	1	1	0	0	0	0	0	0	0	0	0	0	0	0	0	0	0	0
1357	0	70	1	3	3	2	1	1	2	1	1	0	1	1	0	0	0	0	0	0	0	0	0	0	0	0	0	0	0	0
1358	1	70	1	3	1	1	1	1	2	2	2	0	1	0	0	0	0	0	0	0	0	0	2	2	1	1	0	0	1	7
1359	1	70	2	3	2	2	1	2	3	1	2	1	0	0	0	0	0	0	0	0	0	0	1	0	1	1	0	0	1	4
1360	1	70	1	5	3	2	1	2	3	1	1	0	0	0	0	0	0	0	0	1	0	1	0	0	1	1	1	1	1	6
1361	1	70	1	3	1	1	2	1	2	2	2	0	1	0	0	0	0	0	0	0	0	0	0	0	0	0	0	0	0	0
1362	0	70	1	3	1	1	1	1	2	2	2	0	1	0	0	0	0	0	0	0	0	1	0	0	0	0	0	1	1	3
1363	0	70	1	3	1	1	1	1	2	2	2	0	1	1	0	0	0	1	0	0	0	0	1	0	0	0	1	1	2	5
1364	1	70	1	3	1	1	2	2	2	2	1	0	0	0	0	0	0	0	0	0	1	0	0	1	1	2	1	0	1	6
1365	0	70	1	3	1	1	1	1	2	2	2	0	1	0	0	0	0	0	0	0	0	0	0	0	0	0	0	0	1	1
1366	1	70	1	1	1	1	1	1	2	2	2	0	0	1	0	0	0	0	0	0	0	0	1	1	1	1	0	0	1	5
1367	0	70	1	3	2	2	1	2	3	2	2	0	1	1	0	0	0	0	0	0	1	3	3	2	2	1	1	1	0	13
1368	0	70	1	3	1	1	1	2	2	2	1	0	1	1	0	0	0	0	0	0	0	0	0	0	0	0	0	0	0	0
1369	1	70	1	3	2	2	1	2	2	2	2	0	1	0	0	0	0	0	0	0	0	0	0	0	0	0	0	0	0	0
1370	1	70	1	3	1	1	1	1	3	2	2	0	1	1	0	0	0	1	0	0	0	2	2	1	0	2	1	2	1	11
1371	0	70	1	3	2	2	1	1	3	2	2	0	1	1	0	0	0	0	0	0	0	0	0	0	1	0	0	0	1	2
1372	1	70	1	1	1	1	1	1	2	2	2	0	1	0	0	0	0	0	0	0	0	1	0	0	0	0	0	1	1	3
1373	0	70	1	3	1	1	1	1	2	2	2	0	1	1	0	0	0	0	0	0	0	0	0	0	0	0	1	1	1	3
1374	1	70	1	3	1	2	99	1	3	2	2	0	0	1	0	0	0	0	0	0	0	1	0	0	1	1	1	1	2	7
1375	1	70	1	3	1	1	2	1	2	2	2	0	1	1	1	0	0	0	0	0	0	1	1	1	1	1	1	1	1	8
1376	1	70	2	3	2	1	99	1	2	1	2	0	0	0	0	1	0	0	0	0	0	99	99	99	1	1	99	0	99	497
1377	0	70	1	3	2	1	2	2	3	1	2	0	1	0	0	0	0	0	0	0	0	2	2	3	3	2	1	3	1	17
1378	1	70	1	3	1	1	2	1	2	2	2	0	1	0	0	0	0	0	0	0	0	0	0	1	0	1	0	1	1	4
1379	1	70	1	3	3	2	1	2	2	2	2	0	1	0	0	0	0	0	0	0	0	2	1	2	1	1	1	1	1	10
1380	1	70	1	3	2	2	1	1	2	2	2	0	1	0	0	0	0	0	0	0	0	0	0	0	1	1	1	1	1	5
1381	0	70	1	3	2	2	1	1	2	2	2	0	1	1	1	0	0	0	0	0	0	1	0	1	1	1	0	0	1	5
1382	1	70	1	3	1	1	2	2	2	2	1	0	1	1	0	1	0	0	0	0	0	2	0	2	2	2	0	0	1	9
1383	0	70	1	1	1	1	1	1	2	2	2	0	1	1	1	0	0	0	0	0	0	1	1	0	0	1	1	0	1	5
1384	0	70	1	3	2	2	1	1	3	1	3	0	0	0	0	0	0	0	0	0	1	0	1	1	1	1	0	0	1	5
1385	1	70	1	3	1	1	1	1	2	2	2	1	0	0	0	0	0	0	0	0	0	2	2	2	2	2	0	0	1	11
1386	0	70	1	3	1	1	1	1	2	2	1	0	1	1	0	0	0	0	0	0	0	0	0	0	1	0	0	0	1	2
1387	0	70	1	3	1	1	1	2	2	2	1	0	1	1	0	0	0	0	0	0	0	0	0	0	0	0	0	0	0	0
1388	0	70	1	3	1	1	1	1	2	2	1	0	1	1	0	0	0	0	0	0	0	0	0	0	0	0	0	0	1	1
1389	1	70	1	3	1	1	1	2	2	2	99	0	1	1	0	0	0	0	0	0	0	0	0	0	0	0	1	0	0	1
1390	1	70	1	1	1	1	99	1	2	99	1	0	1	0	0	0	0	0	0	0	0	0	0	0	0	0	0	0	0	0
1391	0	70	1	3	1	1	1	1	2	2	1	0	1	1	0	0	0	1	0	0	0	1	0	0	1	1	0	0	1	4
1392	0	70	1	3	1	1	1	1	2	2	2	0	1	1	0	0	0	0	0	0	0	0	0	1	0	0	0	0	1	2
1393	1	70	1	3	2	1	1	2	3	2	2	0	1	1	0	0	0	0	0	0	0	1	0	0	1	0	0	0	1	3
1394	1	70	1	3	1	1	2	1	2	2	2	0	1	0	0	0	0	0	0	0	0	3	3	3	2	2	2	0	1	16
1395	1	70	1	3	2	2	1	1	2	2	99	0	1	1	1	1	0	0	0	0	0	0	0	0	0	0	0	0	0	0
1396	1	70	1	3	1	1	1	2	2	2	2	0	1	0	0	0	0	0	0	0	0	1	1	1	1	1	0	0	1	6
1397	1	70	1	3	1	1	1	1	3	2	2	0	1	0	0	0	0	0	0	0	0	0	0	1	0	0	0	0	0	1
1398	1	70	1	3	1	1	2	1	2	2	2	0	1	1	0	0	0	0	0	0	0	0	0	0	0	0	0	1	1	2
1399	0	70	2	3	3	2	1	1	2	1	2	0	1	1	0	0	0	0	0	0	0	1	0	0	0	1	1	1	1	5
1400	0	70	2	3	2	2	2	2	2	2	2	0	1	1	0	0	0	0	0	0	0	2	2	0	1	1	2	3	1	12
1401	1	70	1	3	1	1	1	1	2	2	2	0	1	0	0	0	0	0	0	0	0	0	0	1	0	1	0	0	1	3
1402	0	70	1	3	1	1	1	1	2	2	2	0	1	1	0	0	0	1	0	0	0	1	1	1	1	2	0	1	1	8
1403	1	70	1	3	2	2	1	1	3	2	3	0	1	0	0	0	0	0	0	0	0	2	0	1	1	1	3	2	1	11
1404	0	70	1	3	1	1	1	1	2	2	2	0	1	0	0	0	0	0	0	0	0	0	0	0	0	0	0	0	0	0
1405	0	70	1	3	1	1	1	2	3	1	2	0	1	0	0	0	0	0	0	0	0	1	1	0	0	2	1	1	1	7
1406	1	70	1	3	1	1	1	1	1	2	1	0	1	0	0	0	0	0	0	0	1	0	0	0	1	1	0	1	1	4
1407	1	70	1	3	1	1	1	1	2	2	2	0	1	0	0	0	0	0	0	0	0	1	0	0	1	1	0	0	1	4
1408	1	70	1	3	2	2	1	1	2	2	2	0	1	0	0	0	0	0	0	0	0	1	0	1	1	1	0	0	1	5
1409	1	70	99	1	99	99	99	99	99	99	99	99	99	99	99	99	99	99	99	99	99	99	99	99	99	99	99	99	99	792
1410	0	70	1	3	3	2	1	2	2	2	2	0	1	0	0	0	0	0	0	0	0	0	0	1	0	1	0	0	1	3
1411	0	70	1	3	1	1	1	2	2	2	2	0	1	1	0	0	0	0	0	0	0	1	0	1	1	1	0	1	1	6
1412	1	70	1	3	1	1	2	1	3	2	1	0	0	0	0	1	0	0	0	0	0	1	0	0	0	0	1	0	1	3
1413	0	70	1	3	2	2	1	1	2	2	3	0	1	0	0	0	0	0	0	0	0	3	3	0	3	3	3	2	3	20
1414	1	70	1	3	3	2	2	2	3	2	2	0	1	0	0	0	0	0	0	0	0	1	0	1	1	1	3	2	1	10
1415	0	70	1	3	1	1	1	1	2	2	2	0	0	1	0	0	0	0	0	0	1	1	1	0	1	1	0	0	1	5
1416	1	70	1	3	2	2	1	1	2	2	3	0	1	0	0	0	0	0	0	0	0	0	0	0	0	0	0	0	0	0
1417	1	70	1	3	1	1	2	1	2	2	2	0	1	1	0	0	0	0	0	0	0	2	1	1	1	1	1	1	1	9
1418	0	70	1	1	3	2	1	1	2	2	2	99	99	99	99	99	99	99	99	99	99	2	1	2	1	1	2	1	1	11
1419	1	70	1	3	1	1	2	1	3	2	2	0	1	1	0	0	0	0	0	0	0	1	0	1	1	1	0	1	1	6
1420	1	70	1	5	1	1	2	1	3	2	3	0	1	0	0	0	0	0	0	0	0	1	1	2	1	1	1	1	1	9
1421	1	70	1	3	1	2	1	1	2	2	2	0	1	0	0	0	0	0	0	0	0	1	1	1	1	1	0	1	1	7
1422	1	70	1	5	1	1	1	1	2	2	2	0	1	1	0	0	0	0	0	0	0	0	0	0	0	0	0	0	1	1
1423	1	70	1	3	2	99	2	1	3	2	2	0	1	1	0	0	0	0	0	0	0	0	2	1	0	0	0	0	0	3
1424	1	70	1	3	1	1	1	1	2	2	2	0	1	0	0	0	0	0	0	0	0	0	0	0	0	0	0	0	1	1
1425	0	70	1	3	1	1	1	1	2	2	1	0	1	1	0	0	0	0	0	0	0	0	0	0	0	0	0	0	1	1
1426	0	70	2	3	3	2	1	1	3	1	1	0	1	1	1	0	0	1	0	1	0	2	0	0	0	0	3	3	1	9
1427	0	70	2	3	2	1	1	1	2	1	2	0	1	0	0	0	0	0	0	0	0	1	1	0	0	0	0	0	1	3
1428	1	70	1	3	1	1	1	1	3	2	2	0	1	1	0	0	0	0	0	0	0	0	0	1	0	0	0	0	1	2
1429	1	70	2	5	1	1	99	1	2	1	2	0	1	1	0	0	0	0	0	0	0	1	0	1	0	0	0	0	1	3
1430	0	70	1	3	1	1	1	1	2	2	1	0	1	0	0	0	0	0	0	0	0	1	0	0	1	1	0	0	0	3
1431	0	70	1	3	1	1	1	1	2	2	2	0	1	1	1	0	0	0	0	0	0	1	1	1	1	1	1	2	1	9
1432	0	70	1	3	1	1	1	1	2	2	1	0	1	0	0	0	0	0	0	0	0	0	0	0	0	0	0	0	0	0
1433	1	70	2	5	3	2	1	1	2	1	99	99	99	99	99	99	99	99	99	99	99	0	0	0	0	0	99	99	99	297
1434	0	70	1	3	1	1	1	1	1	2	1	0	1	1	0	0	0	0	0	0	0	0	0	0	0	0	0	0	1	1
1435	0	70	1	3	1	2	2	99	3	99	2	0	1	1	0	0	0	0	0	0	0	1	1	1	1	1	1	2	1	9
1436	1	70	99	5	3	1	1	1	2	2	2	0	1	0	0	0	0	0	0	0	0	0	0	0	0	0	0	0	0	0
1437	1	70	2	3	3	2	2	1	2	1	1	0	1	1	0	0	0	0	0	0	0	0	0	0	0	0	0	0	1	1
1438	0	70	1	1	1	1	1	1	2	2	1	0	1	1	1	0	0	0	0	0	0	1	0	1	1	1	0	0	1	5
1439	0	70	2	3	3	2	1	1	2	1	1	0	1	1	0	0	0	0	0	0	0	0	0	0	0	0	0	0	1	1
1440	0	70	1	3	2	2	1	1	2	2	2	0	1	1	0	0	0	0	0	0	0	1	1	2	1	1	1	1	1	9
1441	1	70	2	3	3	1	1	1	3	1	2	0	0	1	0	0	0	0	0	0	1	0	0	1	1	1	0	0	1	4
1442	1	70	1	3	1	1	2	1	2	2	2	0	1	0	0	0	0	1	1	0	0	0	0	1	0	0	0	0	1	2
1443	0	70	2	5	3	2	2	2	2	1	2	0	0	1	0	0	0	0	0	0	0	1	0	1	1	1	1	1	1	7
1444	0	70	2	3	2	2	1	1	2	2	2	0	1	1	0	0	0	0	0	0	0	0	0	0	0	0	0	1	1	2
1445	1	70	1	1	1	1	1	1	3	2	1	0	1	1	1	0	0	1	0	0	0	99	2	99	2	2	0	0	1	205
1446	1	70	1	3	3	2	1	2	99	1	2	0	1	0	0	0	0	0	0	0	0	0	0	0	1	1	2	1	1	6
1447	1	70	1	3	1	1	1	1	2	2	1	0	1	0	0	0	0	0	0	0	0	0	0	0	0	0	0	0	0	0
1448	1	70	2	3	2	2	1	1	2	2	2	0	1	0	0	0	0	0	0	0	0	0	0	0	0	0	0	0	0	0
1449	1	70	1	3	1	1	1	1	3	1	2	99	99	99	99	99	99	99	99	99	99	0	1	99	0	1	2	2	3	108
1450	0	70	1	3	1	2	99	1	1	99	3	0	1	1	0	0	0	0	0	0	0	1	1	1	1	1	0	1	2	8
1451	1	70	2	3	2	3	2	2	3	1	3	1	0	0	0	0	0	0	0	0	0	2	3	3	2	2	0	0	0	12
1452	0	70	2	5	3	2	1	2	3	1	2	0	0	1	1	0	0	0	0	0	0	1	1	1	1	1	1	1	1	8
1453	1	70	1	3	1	1	2	1	2	1	2	0	0	1	0	0	0	0	0	0	0	1	1	2	1	1	1	1	1	9
1454	1	70	1	3	2	1	2	1	2	99	2	0	1	0	0	0	0	0	1	0	0	99	0	0	0	0	99	1	2	201
1455	0	70	1	3	2	1	1	1	2	2	2	0	1	1	0	0	0	0	0	0	0	0	0	0	0	0	0	0	1	1
1456	0	70	1	3	1	1	1	1	3	2	1	0	1	1	0	0	0	0	0	0	0	2	1	1	1	1	1	1	1	9
1457	1	70	1	3	1	1	2	1	2	2	1	0	1	0	0	0	0	0	0	0	0	0	0	0	0	0	0	0	1	1
1458	1	70	1	3	3	1	1	1	1	2	1	0	1	1	1	0	0	1	0	1	0	1	1	1	1	1	0	0	1	6
1459	1	70	1	3	2	2	2	1	2	2	2	0	1	0	0	0	0	0	0	0	0	0	0	0	0	0	0	0	0	0
1460	0	70	1	3	2	2	1	2	3	2	2	0	1	1	0	0	0	0	0	0	0	0	0	0	0	0	0	2	1	3
1461	0	70	1	3	6	1	1	2	3	1	2	0	1	1	0	0	0	0	0	0	0	3	2	3	2	3	1	2	1	17
1462	1	70	1	3	6	3	1	2	2	1	2	0	0	0	0	0	0	0	0	0	1	0	0	0	1	0	0	0	1	2
1463	0	70	2	3	3	1	2	1	3	1	2	0	1	1	0	0	0	0	0	0	0	1	1	1	1	1	1	1	1	8
1464	0	70	1	3	1	1	1	1	3	2	2	0	0	1	0	0	0	0	0	0	0	0	0	1	1	1	0	1	1	5
1465	1	70	2	3	3	99	2	2	3	1	2	0	1	0	0	0	0	0	0	0	0	1	1	2	1	1	1	1	1	9
1466	1	70	1	3	1	1	1	1	2	2	1	0	1	0	0	0	0	0	0	0	0	0	0	1	0	0	0	0	1	2
1467	0	70	1	1	1	1	1	1	2	2	2	0	1	1	0	0	0	0	0	0	0	1	1	1	1	1	0	0	1	6
1468	0	70	1	3	1	1	2	1	2	1	2	0	0	1	0	0	0	0	0	0	0	1	1	3	1	1	1	2	1	11
1469	1	70	1	3	1	1	1	1	2	1	1	0	1	1	0	0	0	0	0	0	0	0	0	0	0	0	0	0	0	0
1470	1	70	1	5	3	2	2	2	2	2	2	0	1	0	0	0	0	0	0	0	0	1	2	1	1	0	0	0	1	6
1471	0	70	1	3	1	1	1	1	3	2	2	0	1	0	0	0	0	0	0	0	0	3	1	3	2	2	2	3	1	17
1472	1	70	1	3	1	1	1	1	2	2	2	0	1	0	0	0	0	0	0	0	0	0	0	1	0	1	0	0	1	3
1473	0	70	1	3	1	99	1	1	2	2	2	0	1	1	0	0	0	0	0	0	0	1	0	0	0	0	0	1	1	3
1474	0	70	1	3	3	2	1	1	2	1	1	1	0	0	0	0	0	0	0	0	0	0	0	0	0	0	0	0	0	0
1475	0	70	1	3	1	2	1	1	2	2	1	0	1	1	0	0	0	0	0	0	0	1	0	0	0	1	0	0	0	2
1476	1	70	1	3	1	1	1	1	3	2	2	0	1	1	0	0	0	0	0	0	0	1	1	1	1	1	0	2	1	8
1477	0	70	2	3	3	2	2	2	2	1	2	1	0	0	0	0	0	0	0	0	0	1	0	0	1	1	1	1	1	6
1478	1	70	1	3	1	1	2	99	99	1	2	0	1	0	0	0	0	0	0	0	0	99	99	99	99	99	2	2	2	501
1479	1	70	1	3	1	1	1	1	2	2	2	0	1	0	0	0	0	0	0	0	0	0	0	0	0	1	0	0	1	2
1480	1	70	1	3	1	1	2	2	2	2	2	0	1	0	0	0	0	0	0	0	0	0	0	0	0	1	0	0	1	2
1481	1	70	2	3	3	2	1	1	3	1	1	0	0	1	0	0	0	0	0	0	0	0	0	0	0	0	0	0	1	1
1482	0	71	1	5	3	2	1	1	2	2	1	0	1	1	0	0	0	0	0	0	0	0	0	0	1	0	0	0	1	2
1483	1	71	1	5	3	1	1	2	2	2	1	0	1	0	0	0	0	0	0	0	0	0	0	1	0	0	1	1	1	4
1484	1	71	1	3	6	1	1	1	2	2	1	0	1	0	0	0	0	0	0	0	0	0	0	0	0	0	0	0	0	0
1485	0	71	1	3	1	1	2	1	3	2	2	0	0	1	0	0	0	0	0	0	0	3	2	2	2	2	2	1	2	16
1486	1	71	1	3	1	1	1	1	2	1	2	0	1	0	0	0	0	0	0	0	0	0	0	1	1	0	0	0	1	3
1487	1	71	2	3	2	2	2	2	2	1	2	0	1	0	0	0	0	0	0	0	0	3	3	3	1	3	0	0	0	13
1488	1	71	1	1	3	1	2	2	3	2	1	1	0	0	0	0	0	0	0	0	0	0	0	0	0	0	1	1	2	4
1489	1	71	1	3	1	1	1	1	2	2	3	0	0	1	0	1	0	0	0	0	0	0	0	0	1	1	0	0	1	3
1490	0	71	1	3	1	1	1	1	2	2	2	0	1	1	0	0	0	0	0	0	0	0	0	0	0	0	0	0	0	0
1491	1	71	1	3	1	1	2	1	2	2	2	0	1	0	0	0	0	0	0	0	0	1	1	2	0	1	0	0	1	6
1492	0	71	2	3	1	1	1	1	2	1	1	0	0	1	0	0	0	0	0	0	0	2	0	1	1	1	1	1	1	8
1493	0	71	1	3	1	1	1	2	3	2	2	0	0	1	0	0	0	1	1	0	0	1	1	1	1	1	1	1	1	8
1494	0	71	2	3	2	1	1	1	1	1	1	0	0	1	1	1	0	1	0	0	0	1	1	0	1	1	0	1	2	7
1495	0	71	1	3	3	2	1	1	2	2	2	0	1	0	0	0	0	0	0	0	0	1	0	1	0	0	0	0	1	3
1496	0	71	1	3	1	1	2	1	2	1	1	0	1	1	0	0	0	0	0	0	0	0	0	1	0	0	1	1	1	4
1497	1	71	1	3	1	1	1	1	3	2	2	0	1	1	0	0	0	0	0	0	0	0	1	1	1	2	0	0	1	6
1498	0	71	1	3	2	3	1	2	2	2	2	0	1	0	0	0	0	0	0	0	0	0	0	1	1	1	0	0	1	4
1499	1	71	1	3	1	1	1	1	2	2	2	0	1	0	0	0	0	0	0	0	0	0	0	1	0	1	0	0	1	3
1500	1	71	1	3	1	1	1	1	2	2	2	0	1	1	0	0	0	0	0	0	0	0	0	0	0	0	0	1	1	2
1501	0	71	1	1	1	1	1	1	2	2	1	0	1	1	0	1	0	0	0	0	0	0	0	0	1	0	0	0	1	2
1502	0	71	1	3	2	2	1	1	3	2	2	0	1	1	0	0	0	0	0	0	0	0	0	1	1	1	1	1	1	6
1503	1	71	1	3	2	2	2	1	2	2	2	0	1	0	0	0	0	0	0	0	0	2	1	1	1	1	0	0	1	7
1504	0	71	2	3	3	2	1	1	2	99	2	0	1	0	0	0	0	0	0	0	0	2	1	2	1	2	1	1	1	11
1505	0	71	1	3	1	2	1	1	2	2	2	0	0	0	0	0	0	1	1	0	0	99	1	0	0	1	0	0	1	102
1506	1	71	1	3	2	1	2	1	2	1	3	0	1	0	0	0	0	1	0	0	0	0	0	0	0	1	0	1	1	3
1507	1	71	1	3	1	1	1	1	2	2	2	0	1	1	0	0	0	0	0	0	0	0	0	0	1	1	0	0	1	3
1508	0	71	1	3	1	1	1	1	2	2	2	0	0	1	1	0	0	0	0	0	0	0	0	0	0	1	0	1	0	2
1509	0	71	1	3	2	2	2	1	3	2	2	0	1	0	0	0	0	0	0	0	0	1	1	1	0	0	0	1	1	5
1510	1	71	1	3	3	1	2	1	2	1	3	1	0	0	0	0	0	0	0	0	0	2	1	1	1	1	1	1	1	9
1511	0	71	1	3	3	2	1	1	2	2	2	0	1	1	1	0	0	0	0	0	0	1	0	1	1	0	0	0	1	4
1512	0	71	1	3	2	2	1	2	2	2	2	0	1	1	0	0	0	0	0	0	0	1	0	1	0	0	0	1	1	4
1513	1	71	1	3	2	2	2	2	3	2	2	0	1	1	0	0	0	0	0	0	0	2	2	2	1	2	1	2	1	13
1514	1	71	1	3	1	1	2	1	2	2	2	0	1	1	0	0	0	0	0	0	0	1	1	1	0	1	1	1	1	7
1515	0	71	1	3	1	1	1	1	2	2	1	0	0	1	1	0	0	0	0	0	0	0	0	0	0	0	0	0	1	1
1516	1	71	1	3	6	1	1	1	2	2	2	0	1	0	0	0	0	0	0	0	0	0	0	0	0	0	0	0	0	0
1517	1	71	1	3	1	1	1	1	2	2	1	0	1	1	0	0	0	1	0	0	0	1	0	1	1	0	0	0	0	3
1518	1	71	1	3	1	2	2	1	2	2	2	0	1	0	0	0	0	0	0	0	0	3	3	2	2	2	1	1	1	15
1519	0	71	1	3	1	1	1	1	2	2	1	0	0	1	0	0	0	0	0	0	0	2	1	2	1	1	1	1	2	11
1520	1	71	1	3	1	1	1	1	3	2	1	0	1	1	0	0	0	0	0	0	0	1	0	1	0	0	1	1	1	5
1521	1	71	1	3	1	1	2	1	2	1	1	0	1	1	1	0	0	0	0	0	0	1	0	1	0	1	0	1	1	5
1522	1	71	1	3	1	1	1	1	2	2	2	0	1	0	0	0	0	0	0	0	0	1	0	1	0	1	0	0	1	4
1523	0	71	1	3	1	2	1	1	2	2	2	0	1	1	0	0	0	0	0	0	0	0	0	0	0	0	0	0	1	1
1524	1	71	1	3	1	2	1	1	2	2	2	0	1	1	0	0	0	0	0	0	0	0	0	1	1	1	0	0	0	3
1525	0	71	1	3	1	1	1	1	3	2	2	0	1	0	0	0	0	0	0	0	0	2	2	2	2	2	1	1	0	12
1526	0	71	1	3	1	1	99	1	2	99	1	0	1	1	0	0	0	0	0	0	0	2	1	1	1	1	0	0	1	7
1527	0	71	1	5	1	1	1	1	2	2	2	0	1	0	0	0	0	1	0	0	0	1	0	0	1	1	0	0	1	4
1528	1	71	1	3	1	1	1	1	2	2	2	0	1	0	0	0	0	0	0	0	0	0	0	1	0	1	0	0	1	3
1529	0	71	1	3	1	1	2	2	3	2	2	0	1	0	0	0	0	0	0	0	0	2	1	1	2	2	1	1	2	12
1530	1	71	1	3	2	2	1	1	2	2	2	0	1	0	0	1	0	0	0	0	0	0	0	0	0	0	0	0	1	1
1531	0	71	1	3	1	1	1	1	2	2	2	0	1	1	0	0	0	0	0	0	0	0	0	0	0	0	0	0	0	0
1532	0	71	2	3	2	1	1	2	2	1	1	0	1	0	0	0	0	0	0	0	0	1	0	0	0	0	0	0	0	1
1533	1	71	1	3	1	1	1	1	2	1	3	0	0	0	0	1	0	0	0	0	0	0	1	1	0	0	0	0	1	3
1534	0	71	1	3	1	1	1	1	2	2	2	0	1	0	0	1	0	0	0	0	0	0	1	1	1	1	0	0	1	5
1535	1	71	1	3	1	2	1	1	2	2	2	0	1	0	0	0	0	0	0	0	0	0	0	0	0	0	0	1	1	2
1536	0	71	1	3	3	1	1	2	2	1	1	0	1	0	0	0	0	0	0	0	0	1	0	0	1	1	1	2	1	7
1537	0	71	1	3	1	1	1	1	2	1	2	0	0	1	0	0	0	0	0	0	0	1	1	1	1	1	1	1	1	8
1538	0	71	1	3	1	2	1	1	2	2	2	0	1	0	0	0	0	0	0	0	0	0	0	1	0	0	0	1	1	3
1539	0	71	2	3	3	3	2	1	3	1	2	0	1	1	0	0	0	0	0	0	0	2	1	2	1	1	1	2	2	12
1540	0	71	2	3	2	3	1	1	2	1	99	1	0	0	0	0	0	0	0	0	0	2	2	1	2	2	1	1	1	12
1541	0	71	1	3	1	1	1	1	2	2	2	0	1	0	1	0	0	0	0	0	0	0	0	0	1	1	0	0	0	2
1542	1	71	1	1	1	2	1	2	3	2	2	0	1	0	0	0	0	0	0	0	0	0	2	2	1	1	1	1	1	9
1543	0	71	1	3	3	2	1	1	2	2	2	0	1	1	0	1	0	0	0	0	0	1	0	1	1	1	0	0	1	5
1544	0	71	2	3	2	2	1	1	2	1	2	0	1	1	0	0	0	0	0	0	0	0	0	0	0	0	0	0	0	0
1545	1	71	2	3	2	1	2	2	3	1	3	1	0	0	0	0	0	0	0	0	0	2	1	2	1	1	0	0	1	8
1546	0	71	2	3	1	1	1	1	2	1	2	0	1	1	0	0	0	0	0	0	0	1	0	1	0	1	1	1	1	6
1547	1	71	2	3	2	1	1	2	3	1	2	0	0	0	0	0	1	0	0	1	0	2	1	1	1	1	1	1	1	9
1548	1	71	2	3	2	2	1	2	2	1	2	1	0	0	0	0	0	0	0	0	1	0	2	0	1	0	0	0	1	4
1549	1	71	2	3	2	3	1	2	2	1	2	1	0	0	0	0	0	0	0	0	0	0	0	1	1	1	1	1	1	6
1550	0	71	2	3	1	1	99	1	2	99	2	0	1	0	0	0	0	0	0	0	0	0	0	0	0	0	0	0	1	1
1551	1	71	2	3	1	1	1	1	2	1	2	0	0	0	1	0	0	0	0	0	1	1	0	1	0	1	0	0	0	3
1552	0	71	2	5	3	2	1	1	2	1	1	0	1	1	0	0	0	1	0	0	0	0	0	0	0	0	0	0	0	0
1553	0	71	2	3	2	3	1	1	2	1	1	99	99	99	99	99	99	99	99	99	99	1	1	1	0	0	0	0	0	3
1554	0	71	1	3	2	1	1	99	99	2	2	0	1	1	0	0	0	0	0	0	0	99	99	99	99	99	0	0	0	495
1555	1	71	1	3	2	2	1	2	3	1	2	1	0	0	0	0	0	0	0	0	0	1	1	1	1	1	0	0	1	6
1556	0	71	1	3	1	2	1	1	2	2	2	0	1	0	0	0	0	0	0	0	0	2	0	0	0	0	1	1	1	5
1557	0	71	1	3	2	3	1	1	3	1	2	0	1	1	0	1	0	0	0	0	0	0	1	1	1	1	0	0	1	5
1558	1	71	1	3	1	1	1	1	2	1	1	0	1	0	0	0	0	0	0	0	0	0	0	0	0	0	0	0	0	0
1559	0	71	1	3	3	2	1	2	3	2	2	1	0	0	0	0	0	0	0	0	0	2	1	1	1	1	1	2	2	11
1560	0	71	2	3	2	1	1	1	1	1	1	1	0	0	0	0	0	0	0	0	0	2	2	2	2	2	2	99	2	113
1561	0	71	1	3	1	1	1	1	2	1	2	0	0	0	0	0	0	0	0	0	1	1	1	3	1	1	1	2	1	11
1562	0	71	2	1	3	2	1	1	2	3	1	0	0	1	1	0	0	0	0	0	0	2	1	1	1	1	0	0	1	7
1563	0	71	1	3	1	1	1	1	2	2	2	0	1	0	0	1	0	0	0	0	0	2	0	0	0	1	0	0	0	3
1564	1	71	1	3	1	1	1	1	2	2	2	0	1	1	0	0	0	0	0	0	0	1	0	1	1	1	0	1	1	6
1565	1	71	1	3	1	1	1	1	2	2	2	0	1	0	0	0	0	0	0	0	0	0	0	1	0	0	0	0	1	2
1566	1	71	1	3	1	1	1	1	2	2	3	0	1	1	0	0	0	0	0	0	1	0	99	99	1	1	0	0	0	200
1567	1	71	1	3	1	1	1	1	2	2	2	0	1	0	0	0	0	0	0	0	0	0	1	1	0	1	0	0	0	3
1568	0	71	1	3	1	1	1	1	2	2	2	0	1	0	0	1	0	1	0	0	0	0	1	0	0	0	0	1	1	3
1569	0	71	1	3	2	1	1	1	2	2	2	0	1	1	0	0	0	0	0	0	0	1	0	0	0	1	0	0	2	4
1570	1	71	1	3	2	2	2	2	3	2	3	0	0	1	0	0	0	0	0	0	0	3	3	3	3	3	1	1	2	19
1571	0	71	2	3	3	1	1	2	3	1	2	0	0	1	0	0	0	1	0	0	0	1	1	1	2	2	1	2	1	11
1572	0	71	1	3	2	2	1	1	2	2	3	0	1	1	0	0	0	0	0	0	0	0	0	0	0	0	0	0	0	0
1573	1	71	2	3	1	1	2	1	2	2	2	0	1	0	0	0	0	0	0	0	0	0	0	1	0	0	0	0	2	3
1574	1	71	2	3	3	1	1	2	2	1	2	1	0	0	0	0	0	0	0	0	0	1	1	3	1	1	0	0	1	8
1575	0	71	1	3	1	1	1	1	2	1	1	0	1	0	0	0	0	0	0	0	0	0	1	1	0	1	0	0	1	4
1576	0	71	2	3	2	2	1	1	2	1	2	1	0	0	0	0	0	0	0	0	0	1	1	1	1	1	1	1	1	8
1577	0	71	2	5	4	2	2	1	2	1	2	0	0	1	0	0	1	0	0	0	0	1	0	1	1	1	0	0	1	5
1578	1	71	1	1	1	1	1	1	2	2	2	0	1	1	1	0	0	0	0	0	0	0	1	0	0	1	0	0	1	3
1579	1	71	2	3	2	2	2	2	3	1	3	0	0	1	0	0	0	0	0	0	0	1	1	1	1	1	0	1	1	7
1580	0	71	1	3	2	1	1	1	2	1	2	0	1	1	0	0	0	0	0	0	0	0	0	0	1	0	0	0	0	1
1581	0	71	1	3	1	1	2	1	2	1	2	0	1	1	0	0	0	0	0	0	0	1	99	99	99	99	0	0	0	397
1582	0	71	2	3	2	2	99	1	3	99	2	0	0	1	0	0	0	0	0	0	0	1	0	1	0	0	0	1	1	4
1583	1	71	1	3	2	2	1	1	2	2	2	0	1	0	0	0	0	0	0	0	0	0	0	0	0	0	0	0	0	0
1584	0	71	1	3	1	1	1	1	2	2	2	0	1	0	0	0	0	0	0	0	0	1	0	0	1	0	0	0	1	3
1585	1	71	1	3	1	1	1	1	2	2	2	0	1	1	0	0	0	0	0	0	0	0	1	2	1	1	0	1	2	8
1586	1	71	2	3	3	2	2	2	2	1	2	0	0	1	0	0	0	0	0	0	0	0	0	1	0	0	0	0	1	2
1587	0	71	2	3	1	1	1	1	2	1	1	0	1	1	1	0	0	0	0	0	0	1	1	1	1	1	0	0	1	6
1588	1	71	1	1	1	1	1	1	2	2	1	0	1	0	0	0	0	0	0	0	0	0	0	1	1	1	0	1	1	5
1589	1	71	1	1	1	1	1	1	2	2	1	0	1	1	1	0	0	0	0	0	0	0	1	1	1	1	0	0	1	5
1590	0	71	1	3	1	1	1	1	2	2	2	0	1	0	0	0	0	0	0	0	0	1	0	0	1	1	0	0	0	3
1591	1	71	1	3	1	1	2	1	3	2	1	0	1	0	0	0	0	0	0	0	0	2	1	1	1	1	0	0	1	7
1592	1	71	1	3	1	1	1	1	2	2	3	0	1	0	0	0	0	0	0	0	0	0	0	0	0	0	0	0	1	1
1593	1	71	1	3	1	1	2	1	2	2	2	0	1	1	0	0	0	0	0	0	0	0	1	2	1	1	0	0	0	5
1594	0	71	1	3	1	2	1	1	2	2	2	0	1	1	0	0	0	0	0	0	0	2	1	0	1	1	0	0	1	6
1595	0	71	1	3	1	1	1	1	2	2	2	0	1	1	0	0	0	0	0	0	0	0	1	1	1	1	0	0	1	5
1596	0	71	1	3	1	1	1	1	2	2	2	0	1	1	0	0	0	0	0	0	0	99	1	1	0	1	0	0	1	103
1597	1	71	1	3	1	1	1	1	2	2	2	0	1	0	0	0	0	0	0	0	0	0	0	1	0	0	0	0	0	1
1598	0	71	1	3	3	2	1	1	2	2	2	0	1	1	0	0	0	0	0	0	0	0	1	1	1	1	1	1	2	8
1599	1	71	1	3	1	1	1	1	2	2	2	0	1	0	0	0	0	0	0	0	0	0	0	1	0	0	0	1	1	3
1600	0	71	1	3	1	1	1	1	2	2	2	0	1	0	0	0	0	0	0	0	0	1	0	0	0	0	0	0	1	2
1601	0	71	1	3	1	1	1	1	2	2	2	0	0	1	0	0	0	0	0	0	0	2	0	99	1	1	0	0	1	104
1602	1	71	2	1	3	1	2	1	3	1	99	99	99	99	99	99	99	99	99	99	99	1	0	1	1	1	99	99	99	301
1603	0	71	1	3	1	1	1	1	2	2	2	0	1	0	0	0	0	1	0	0	0	0	1	1	1	1	0	1	1	6
1604	0	71	1	3	1	1	1	1	2	2	1	0	1	0	0	0	0	0	0	0	0	0	0	1	0	0	0	0	1	2
1605	1	71	1	3	1	1	1	1	2	2	1	0	1	0	0	0	0	0	0	0	0	0	1	2	0	1	0	0	1	5
1606	1	71	1	3	2	1	2	2	3	2	2	0	1	1	0	0	0	0	0	0	0	1	0	1	0	1	0	1	1	5
1607	0	71	1	3	1	1	1	1	2	2	2	0	0	1	0	0	0	0	0	0	0	0	0	0	0	0	0	1	1	2
1608	0	71	2	3	1	1	99	1	2	99	3	0	1	1	1	0	0	1	0	0	0	0	0	0	0	0	0	1	1	2
1609	0	71	1	3	2	1	1	1	2	2	1	0	1	1	0	0	0	0	0	0	0	0	2	0	2	1	1	0	1	7
1610	1	71	2	3	1	1	1	1	2	1	2	1	0	0	0	0	0	0	0	0	0	0	0	0	0	0	0	0	0	0
1611	0	71	2	5	1	1	1	1	1	1	1	0	0	1	0	0	0	0	0	0	0	0	0	0	99	0	0	0	1	100
1612	1	71	2	3	1	1	1	1	2	1	2	0	1	1	0	0	0	1	0	0	0	0	1	0	0	1	0	0	1	3
1613	0	71	1	3	1	1	1	1	3	2	3	0	0	1	0	0	0	0	0	0	0	1	1	1	0	0	2	1	0	6
1614	1	71	1	1	1	3	1	1	2	99	2	0	1	1	0	0	0	1	0	0	0	1	0	1	1	0	0	0	1	4
1615	0	71	1	3	3	1	1	1	3	2	1	0	1	0	0	0	0	0	0	0	0	1	0	1	0	1	1	0	1	5
1616	0	71	1	3	1	1	1	1	2	2	1	0	1	0	0	0	0	1	0	0	0	0	0	0	0	0	0	0	0	0
1617	0	71	1	5	2	2	99	1	3	99	2	0	1	0	0	0	0	0	0	0	0	3	3	3	2	2	1	2	1	17
1618	0	71	2	3	2	3	1	1	2	1	1	0	0	1	0	0	0	0	0	0	0	0	1	1	0	0	0	0	1	3
1619	1	71	1	3	1	1	1	1	1	2	3	0	1	0	0	0	0	0	0	0	0	0	1	1	2	1	1	1	2	9
1620	0	71	1	3	1	1	1	1	2	2	1	0	1	1	0	0	0	0	0	0	0	1	0	1	1	1	0	1	1	6
1621	0	71	1	3	1	1	1	1	3	2	2	0	1	1	0	0	0	0	0	0	0	1	1	1	1	1	0	0	1	6
1622	1	71	1	3	2	2	2	2	3	2	3	0	0	0	0	0	0	1	0	0	0	1	1	1	1	1	2	2	0	9
1623	1	71	1	3	2	2	1	2	3	2	2	0	1	0	0	0	0	0	0	0	0	3	2	3	2	2	2	2	0	16
1624	1	71	2	3	2	2	1	2	3	1	2	0	0	1	0	0	0	1	0	0	0	0	0	1	1	1	0	1	2	6
1625	0	71	2	3	1	1	1	1	2	2	1	0	1	0	0	0	0	0	0	0	0	2	0	1	1	1	0	0	1	6
1626	0	71	1	3	2	1	1	1	2	2	1	0	1	1	0	0	0	0	0	0	0	0	0	0	0	0	0	0	1	1
1627	1	71	1	5	1	1	2	1	2	2	1	0	1	0	0	0	0	0	0	0	0	0	0	0	0	0	0	0	1	1
1628	0	71	1	3	1	1	1	1	2	2	2	0	1	0	0	0	0	0	0	0	0	0	0	0	0	0	0	0	1	1
1629	0	71	1	3	1	1	1	1	2	2	2	0	1	0	0	0	0	0	0	0	0	0	0	0	0	0	0	0	0	0
1630	1	71	2	3	2	2	2	2	2	1	2	0	1	1	0	0	0	0	0	0	0	0	1	1	0	1	1	2	1	7
1631	1	71	1	5	1	1	1	1	2	2	1	0	1	0	0	0	0	0	0	0	0	0	1	2	1	1	0	0	1	6
1632	0	71	2	3	1	1	1	1	2	1	2	0	1	1	0	0	0	0	0	0	0	1	0	1	1	0	0	1	1	5
1633	1	71	2	3	2	3	1	1	2	1	2	0	0	1	0	0	0	0	0	0	0	0	0	0	0	0	0	0	1	1
1634	0	71	1	3	6	1	1	1	2	2	1	0	1	0	0	0	0	0	0	0	0	1	1	1	1	1	0	0	1	6
1635	0	71	2	1	3	99	2	2	3	1	1	0	0	1	0	0	0	0	0	0	0	2	3	2	1	2	3	3	3	19
1636	0	71	1	3	1	1	1	1	2	2	1	0	1	0	0	0	0	0	0	0	0	0	0	0	0	0	0	0	0	0
1637	0	71	2	3	3	2	1	1	2	1	1	0	0	1	0	0	0	0	0	0	0	1	0	0	1	1	0	0	1	4
1638	1	71	1	3	1	1	1	1	2	2	1	0	1	1	1	0	0	0	0	0	0	0	0	0	1	0	1	0	0	2
1639	0	71	2	3	4	3	1	2	3	1	2	0	1	1	1	0	0	0	1	0	0	1	0	1	1	1	1	1	1	7
1640	0	71	2	3	4	2	1	1	2	1	2	0	0	1	0	0	0	0	0	0	0	0	1	1	0	0	0	0	1	3
1641	0	71	99	3	1	1	1	1	1	99	2	0	1	0	0	0	0	0	0	0	0	0	1	2	1	1	0	1	1	7
1642	0	71	1	3	3	2	1	1	2	1	2	0	1	1	0	0	0	1	0	0	0	2	2	2	1	1	1	1	1	11
1643	0	71	1	3	1	3	1	1	3	2	2	0	1	0	0	0	0	0	0	0	0	1	0	1	0	1	0	1	0	4
1644	1	71	1	3	1	1	1	1	2	2	1	0	1	1	0	0	0	0	0	1	0	2	0	1	1	1	0	0	1	6
1645	1	71	1	3	2	2	2	1	3	2	1	0	1	0	0	0	0	0	0	0	0	0	0	0	0	0	0	0	0	0
1646	0	71	1	3	2	1	1	2	3	1	3	0	1	0	0	0	0	0	0	0	0	99	0	0	0	1	1	1	1	103
1647	1	71	1	3	1	1	1	1	2	2	2	0	1	0	0	1	0	0	0	0	0	0	0	1	0	0	0	0	0	1
1648	0	71	2	5	3	2	1	1	3	1	99	99	99	99	99	99	99	99	99	99	99	1	0	1	0	0	99	99	99	299
1649	0	71	1	3	1	1	1	1	2	2	2	0	1	0	0	0	0	0	0	0	0	1	0	1	1	1	0	1	1	6
1650	1	71	1	3	1	1	1	1	2	2	2	0	0	0	0	0	0	0	0	0	1	0	0	0	1	0	0	0	0	1
1651	0	71	1	3	1	1	1	1	2	2	1	0	1	1	0	0	0	0	0	0	0	0	0	1	0	0	0	0	1	2
1652	0	71	1	3	1	1	1	1	2	2	2	0	1	0	0	0	0	0	0	0	0	0	0	0	0	1	0	0	1	2
1653	0	71	1	3	3	2	2	1	2	2	2	0	1	0	0	0	0	0	0	0	0	1	99	99	2	0	0	0	0	201
1654	0	71	1	3	6	2	1	1	3	2	3	0	0	1	0	0	0	0	1	0	0	1	1	0	1	1	2	2	1	9
1655	1	71	1	3	3	2	1	1	2	2	2	0	1	0	0	0	0	0	0	0	0	0	0	0	0	0	0	0	1	1
1656	1	71	1	1	1	1	1	1	2	2	1	0	1	0	0	0	0	0	0	0	0	0	0	0	0	0	0	0	1	1
1657	1	71	1	3	1	1	1	2	2	2	1	0	1	0	0	0	0	0	0	0	0	0	0	0	0	0	0	0	1	1
1658	0	71	1	3	2	1	2	1	1	2	1	0	1	0	0	0	0	0	0	0	0	0	0	0	0	0	0	0	0	0
1659	1	71	1	3	1	1	1	1	2	2	2	0	1	0	0	0	0	0	0	0	0	0	0	0	0	0	0	0	1	1
1660	0	71	1	3	2	2	1	1	2	2	2	0	1	1	0	0	0	1	0	0	1	1	2	1	2	2	1	1	1	11
1661	1	71	1	3	1	1	1	1	2	2	2	0	1	0	0	0	0	0	0	0	0	0	0	1	0	0	0	0	1	2
1662	0	71	1	5	3	99	1	2	2	2	2	0	0	1	1	0	0	0	0	0	0	2	1	1	1	2	1	1	0	9
1663	0	71	1	3	3	2	1	1	2	2	2	0	1	0	0	0	0	0	0	0	0	1	2	2	1	2	1	1	1	11
1664	1	71	2	3	1	1	2	1	3	1	2	0	0	1	0	0	0	1	0	0	0	0	0	0	0	0	1	0	1	2
1665	1	71	2	5	6	2	1	1	2	3	2	0	0	0	0	0	0	0	1	0	0	0	0	0	0	0	1	1	0	2
1666	0	71	1	5	3	1	1	1	2	2	2	0	1	0	0	0	0	0	0	0	0	0	1	1	0	0	0	0	1	3
1667	0	71	1	3	3	1	1	1	2	2	2	0	1	1	1	0	0	0	0	0	0	0	0	0	1	1	0	0	1	3
1668	0	71	2	3	1	1	1	1	3	1	2	1	0	0	0	0	0	0	0	1	0	3	2	3	3	3	2	2	1	19
1669	0	71	1	3	4	2	2	1	2	2	2	0	1	0	0	0	0	0	0	0	0	1	1	1	1	1	0	1	1	7
1670	0	71	1	3	1	2	2	2	2	2	2	99	99	99	99	99	99	99	99	99	99	2	2	1	1	1	0	99	99	205
1671	0	71	1	3	2	2	99	1	2	99	3	0	1	1	1	0	0	0	0	0	0	0	0	0	1	0	0	0	0	1
1672	0	71	1	3	2	2	1	2	2	1	2	0	1	0	0	0	0	0	1	0	0	1	1	1	1	1	0	1	1	7
1673	1	71	1	3	2	1	1	1	1	2	2	0	1	0	0	0	0	0	0	0	0	0	0	0	0	0	0	1	1	2
1674	0	71	2	3	3	2	1	1	3	1	2	0	1	1	1	0	0	0	0	1	0	99	99	99	0	0	0	0	0	297
1675	1	71	1	3	1	1	1	1	2	2	2	0	1	1	0	0	0	0	0	0	0	0	1	1	1	1	0	0	2	6
1676	1	71	2	5	3	1	1	1	2	1	1	0	0	1	0	0	0	0	0	0	0	0	0	0	0	0	0	0	1	1
1677	0	71	2	3	3	1	99	1	2	1	2	0	1	1	1	1	0	0	0	0	0	0	1	0	0	0	99	99	1	200
1678	1	71	1	3	2	1	1	1	3	2	1	0	1	1	1	0	0	1	0	0	0	2	0	1	1	2	0	0	2	8
1679	0	71	2	5	3	2	1	2	2	1	2	1	0	0	0	0	0	0	0	0	0	1	0	0	0	0	0	2	0	3
1680	0	71	1	3	1	1	1	1	2	2	3	0	1	0	0	0	0	0	0	0	0	0	0	2	0	0	0	0	0	2
1681	0	71	2	3	1	1	99	2	2	99	1	0	1	0	0	0	0	0	0	0	0	1	0	1	0	1	1	1	1	6
1682	0	71	1	3	1	1	1	1	2	2	1	0	1	1	0	0	0	0	0	0	0	0	0	0	0	0	0	1	1	2
1683	1	71	1	3	6	2	1	1	3	2	3	0	1	1	0	0	0	0	1	0	0	0	2	0	1	1	2	2	2	10
1684	0	71	1	3	1	1	1	1	2	2	2	0	1	1	0	0	0	0	0	0	0	0	0	1	0	0	0	2	1	4
1685	0	71	2	3	1	1	1	1	2	1	2	0	0	0	0	1	0	0	0	0	0	3	1	1	1	1	1	2	1	11
1686	1	71	1	3	1	1	1	1	2	2	1	0	1	0	0	0	0	0	0	0	1	1	0	2	0	1	0	1	1	6
1687	0	71	1	3	1	1	1	1	2	2	2	0	1	0	0	0	0	0	0	0	0	0	0	0	0	0	0	0	1	1
1688	0	71	1	5	3	2	1	1	2	2	2	0	1	1	0	0	0	0	1	1	0	99	99	99	99	99	0	0	1	496
1689	0	71	1	3	3	2	1	2	2	1	1	0	1	1	0	0	0	1	0	0	0	99	99	2	2	1	99	2	2	306
1690	1	71	1	1	1	1	1	1	2	2	1	0	1	0	0	0	0	0	0	0	0	0	0	0	0	0	0	0	0	0
1691	0	71	1	3	1	1	99	2	2	99	2	0	1	1	0	0	0	0	0	0	0	1	0	1	1	1	0	0	1	5
1692	0	71	1	3	1	1	1	1	2	2	2	0	1	0	0	0	0	0	0	0	0	0	0	0	0	0	0	0	0	0
1693	1	71	2	3	1	2	1	1	2	1	1	0	1	1	0	0	0	0	0	0	0	0	0	0	0	0	0	0	0	0
1694	0	71	1	3	1	1	1	1	2	2	2	0	1	1	0	0	0	0	0	0	0	2	0	1	1	1	0	2	2	9
1695	0	71	1	5	3	2	1	1	2	2	2	0	1	0	0	0	0	0	0	0	0	0	0	0	1	0	0	0	1	2
1696	0	71	1	3	2	1	99	2	3	99	99	99	99	99	99	99	99	99	99	99	99	3	2	3	2	2	99	99	99	309
1697	0	71	1	3	1	1	1	1	2	2	2	0	0	0	0	0	0	0	0	0	1	0	1	99	0	0	0	0	0	100
1698	0	71	1	1	1	1	1	1	2	2	2	0	1	0	0	0	0	0	0	0	0	0	0	0	0	0	0	0	1	1
1699	0	71	2	3	3	2	1	2	3	1	2	0	0	0	0	1	0	0	0	0	0	0	0	1	1	0	0	0	1	3
1700	1	71	1	3	2	1	2	1	3	1	2	0	1	0	0	0	0	0	1	0	0	0	0	1	0	0	0	0	1	2
1701	0	71	1	3	2	1	1	1	2	2	2	0	0	1	0	0	0	0	0	0	0	1	0	0	1	1	1	1	1	6
1702	0	71	1	3	1	1	1	1	3	2	1	0	1	1	1	0	0	0	0	0	0	1	1	1	1	1	1	1	1	8
1703	1	71	1	1	4	2	2	1	3	1	2	0	1	0	0	0	0	0	0	0	0	1	0	0	1	0	0	1	1	4
1704	1	71	1	3	1	1	2	1	2	2	2	0	1	0	0	0	0	0	0	0	0	0	1	2	1	1	0	1	1	7
1705	1	71	1	3	6	3	2	2	3	2	2	0	1	1	0	0	0	0	0	0	0	1	0	1	1	0	0	0	1	4
1706	1	71	1	3	2	1	1	1	2	2	2	0	1	0	0	0	0	0	0	0	0	0	0	0	0	0	0	0	0	0
1707	0	71	1	3	1	1	1	1	2	2	2	0	0	1	0	0	0	0	0	0	0	1	0	1	1	1	0	1	1	6
1708	0	71	1	3	3	2	1	1	2	2	1	0	1	1	1	1	0	0	0	0	0	1	0	1	0	0	0	0	1	3
1709	0	71	2	3	2	1	2	2	3	1	2	0	1	0	0	0	0	0	0	0	1	3	1	99	3	3	2	2	3	116
1710	1	71	1	3	1	1	1	1	3	2	2	0	1	1	0	0	0	1	0	0	0	1	2	0	1	2	2	1	1	10
1711	0	71	1	3	1	1	1	1	1	2	2	0	1	1	0	0	0	0	0	0	0	1	1	1	1	1	1	1	1	8
1712	0	71	1	1	1	1	1	1	2	1	1	0	1	1	1	0	0	0	0	0	0	0	0	1	0	1	0	1	1	4
1713	1	71	1	3	1	2	2	1	2	2	2	0	0	0	0	0	0	0	0	1	0	0	0	0	0	0	0	0	1	1
1714	1	71	1	3	3	2	2	1	2	2	2	0	1	1	0	0	0	0	0	0	0	0	1	0	1	1	0	0	1	4
1715	0	71	99	5	3	99	1	1	2	1	1	0	1	0	0	0	0	0	0	0	0	0	0	1	1	1	0	0	0	3
1716	1	71	1	3	1	1	1	1	2	2	1	0	1	0	1	0	0	0	0	0	0	0	0	0	0	0	0	0	1	1
1717	1	71	1	3	2	3	2	1	2	1	3	0	1	0	0	0	0	0	0	0	0	2	1	2	1	1	1	1	1	10
1718	0	71	1	3	3	3	2	2	3	2	1	0	1	0	0	0	0	0	0	0	0	1	0	0	0	0	1	1	1	4
1719	0	71	1	3	99	2	1	1	2	2	2	0	1	0	0	0	0	0	0	0	1	0	0	1	0	0	0	0	1	2
1720	0	71	1	5	2	2	2	1	1	2	2	0	1	1	0	0	0	0	0	0	0	0	1	0	0	1	0	2	1	5
1721	0	71	2	3	2	2	1	1	2	1	3	0	1	1	0	0	0	0	0	0	0	0	0	0	0	0	0	0	1	1
1722	0	71	1	3	2	1	99	1	3	1	2	0	1	0	0	1	0	0	0	0	0	0	0	2	99	1	1	1	1	105
1723	0	71	1	5	3	2	2	1	3	2	1	99	99	99	99	99	99	99	99	99	99	0	1	2	0	2	1	2	1	9
1724	1	71	1	5	3	2	1	1	3	2	1	0	1	0	0	0	0	1	0	0	0	0	1	0	0	0	0	0	0	1
1725	1	71	1	1	1	1	1	1	3	2	1	0	1	1	0	0	0	1	0	0	0	0	2	2	1	2	0	1	1	9
1726	1	71	2	5	1	1	1	2	3	1	2	0	1	0	0	0	0	0	0	0	0	0	0	0	0	0	0	1	2	3
1727	0	71	1	3	1	1	1	1	2	2	1	0	1	1	0	0	0	0	0	0	0	1	0	1	1	1	0	0	1	5
1728	0	71	1	3	1	1	1	1	2	2	2	0	1	0	0	0	0	0	0	0	0	1	0	0	1	1	0	1	1	5
1729	0	71	1	3	1	1	1	1	2	2	2	0	1	1	1	0	0	0	0	0	0	1	0	1	1	1	0	0	1	5
1730	0	71	1	3	1	1	1	1	2	2	1	0	1	0	0	0	0	0	0	0	0	1	0	1	0	0	0	0	1	3
1731	0	71	1	3	1	1	1	1	2	2	1	0	0	1	0	0	0	0	0	0	0	1	1	2	1	1	1	0	1	8
1732	1	71	1	3	1	99	1	1	2	2	1	0	1	1	0	0	0	0	0	0	0	0	0	0	0	1	0	0	1	2
1733	1	71	1	3	1	1	99	1	3	99	2	0	1	1	0	0	0	0	0	0	0	1	1	1	0	1	0	0	1	5
1734	0	71	1	3	1	2	1	1	2	2	1	0	1	0	0	0	0	0	0	0	0	1	0	1	0	0	1	1	1	5
1735	1	71	1	3	2	1	2	1	1	2	2	0	1	0	0	0	0	0	0	0	0	1	1	2	2	1	0	2	2	11
1736	1	71	1	3	1	1	1	1	2	2	2	0	1	0	0	0	0	1	0	0	0	0	0	1	0	0	0	1	1	3
1737	0	71	2	3	2	2	99	2	2	1	3	0	0	1	0	0	0	0	0	0	0	1	0	1	1	1	1	2	1	8
1738	1	71	1	3	2	1	2	1	2	2	1	0	1	0	0	0	0	0	0	0	0	0	0	0	0	0	0	0	1	1
1739	0	71	1	3	1	1	1	1	2	2	3	0	1	0	0	0	0	0	0	0	0	1	1	2	1	1	1	2	1	10
1740	0	71	1	3	2	2	1	1	3	2	2	0	1	0	0	0	0	0	0	0	0	0	0	0	0	0	0	0	0	0
1741	1	71	1	1	1	1	2	99	99	2	99	99	99	99	99	99	99	99	99	99	99	99	99	99	99	99	99	99	99	792
1742	0	71	1	3	1	1	1	1	2	2	2	0	1	0	0	0	0	0	0	0	0	1	0	0	2	1	0	0	2	6
1743	0	71	1	3	2	2	1	1	2	2	1	0	1	0	1	0	0	0	0	0	0	1	0	0	0	0	0	0	1	2
1744	1	71	1	3	2	2	1	1	2	2	2	0	1	0	0	0	0	0	0	0	0	0	0	0	0	0	0	0	0	0
1745	0	71	1	3	1	1	1	1	2	2	2	0	1	1	0	0	0	0	0	0	0	0	0	0	0	0	1	1	1	3
1746	0	71	1	3	1	1	1	1	2	2	2	0	1	1	0	0	0	1	0	0	0	0	0	1	0	0	0	0	1	2
1747	0	71	99	3	1	1	1	1	2	1	2	0	1	0	0	0	0	0	0	0	0	1	1	1	1	1	0	1	1	7
1748	0	71	2	3	2	1	2	1	2	1	2	0	0	0	1	0	0	0	0	0	0	2	2	2	1	1	1	1	1	11
1749	1	71	1	1	1	1	2	1	2	2	1	0	1	0	0	0	0	1	1	0	0	0	0	0	0	0	0	0	1	1
1750	1	71	1	3	3	3	1	1	1	2	2	0	0	0	0	0	0	0	0	1	0	0	1	2	2	1	0	2	1	9
1751	0	71	2	3	2	2	1	2	3	1	2	0	1	1	0	0	0	0	0	0	0	1	0	1	0	0	1	1	1	5
1752	1	71	1	3	1	1	1	99	2	2	1	0	1	0	0	0	0	0	0	0	0	0	0	2	0	1	0	0	1	4
1753	1	71	2	3	3	2	1	1	2	1	2	0	1	0	0	0	0	0	0	0	0	0	0	0	0	0	0	0	1	1
1754	1	71	1	3	6	2	1	1	2	2	2	0	1	0	0	0	0	0	0	0	0	0	0	1	0	1	0	0	1	3
1755	1	71	1	3	1	1	1	1	2	2	3	0	1	0	0	0	0	0	0	0	0	0	0	0	0	0	0	0	99	99
1756	0	71	2	3	2	2	1	2	2	1	2	0	1	0	0	0	0	1	0	0	0	1	0	1	1	1	0	0	1	5
1757	1	71	1	5	1	1	1	1	2	2	2	0	1	0	0	1	0	0	0	0	0	0	0	0	1	1	1	0	1	4
1758	1	71	1	3	2	1	1	1	2	2	2	0	0	0	0	0	0	0	0	0	1	0	0	0	0	0	0	0	1	1
1759	1	71	1	3	1	1	2	1	3	1	2	0	1	0	0	0	0	0	0	0	0	0	0	0	1	1	1	1	1	5
1760	1	71	1	3	2	2	2	1	2	2	2	0	1	0	0	0	0	0	1	0	0	0	1	2	0	1	0	2	1	7
1761	0	71	2	3	2	3	1	2	2	1	2	0	0	1	0	0	0	1	0	0	0	1	2	0	1	1	0	1	1	7
1762	1	71	1	3	1	1	1	1	3	2	2	0	1	0	0	0	0	0	0	0	0	0	0	1	0	0	0	0	1	2
1763	1	71	1	3	1	1	2	1	3	2	2	1	0	0	0	0	0	0	0	0	0	1	2	1	1	1	1	1	1	9
1764	0	71	1	3	2	1	1	99	99	2	2	0	0	1	0	0	0	0	0	0	0	99	99	1	1	1	99	1	0	301
1765	0	71	1	3	1	1	1	2	2	2	1	0	1	0	0	0	0	0	0	0	0	0	0	0	0	0	0	1	1	2
1766	1	71	1	3	2	99	1	1	2	2	2	0	0	1	0	0	0	0	0	0	0	0	0	0	0	0	0	0	1	1
1767	1	71	2	3	3	3	2	1	2	3	2	0	0	1	0	0	0	1	0	0	0	2	1	0	1	1	0	0	1	6
1768	0	71	2	3	3	2	1	1	2	1	2	0	0	1	0	0	1	0	0	0	0	0	0	0	0	0	0	1	0	1
1769	0	71	1	3	1	1	1	1	2	2	2	0	1	1	0	0	0	0	0	0	0	1	0	1	0	0	0	1	1	4
1770	1	71	1	1	1	1	1	1	2	2	1	0	1	0	0	0	0	0	0	0	0	0	0	0	0	0	0	0	0	0
1771	1	71	1	3	2	2	2	2	3	2	2	0	1	0	0	0	0	0	0	0	0	1	1	1	1	2	1	2	1	10
1772	0	71	1	3	3	2	1	1	2	2	2	0	1	1	0	0	0	0	0	0	0	1	1	1	1	1	1	1	1	8
1773	1	71	2	1	1	1	1	1	2	2	2	0	1	0	0	0	0	0	0	0	0	0	0	0	0	1	0	0	1	2
1774	0	71	2	3	1	1	1	1	3	1	2	1	0	0	0	0	0	0	0	0	0	2	1	1	1	1	0	1	0	7
1775	1	71	1	3	1	1	2	2	2	2	2	0	1	1	0	0	0	0	0	0	1	2	2	2	1	2	1	3	2	15
1776	1	71	1	1	1	1	1	1	2	2	1	1	0	0	0	0	0	0	0	0	0	1	0	1	0	1	0	1	1	5
1777	0	71	2	3	1	1	1	1	2	1	2	0	1	0	0	0	0	0	0	0	0	1	0	1	1	1	0	0	0	4
1778	1	71	2	3	2	1	1	2	2	1	2	0	0	1	1	0	1	0	0	0	0	0	0	0	0	0	0	2	0	2
1779	0	71	1	3	2	2	2	1	3	2	2	0	1	1	0	0	0	0	0	0	0	0	0	0	0	1	1	3	1	6
1780	1	71	1	3	1	1	1	1	1	2	2	0	1	1	0	0	0	1	0	0	0	0	1	2	1	1	0	1	1	7
1781	0	71	2	3	1	1	1	1	2	1	2	0	1	1	0	0	0	0	0	0	0	0	0	0	1	1	0	0	1	3
1782	0	71	1	3	1	1	1	1	2	2	2	0	1	1	1	0	0	0	0	0	0	1	0	0	0	0	0	1	1	3
1783	0	71	1	3	1	1	1	1	2	2	1	0	1	1	0	0	0	0	0	0	0	0	0	0	0	0	0	0	0	0
1784	1	71	1	3	1	1	2	1	2	2	2	0	1	1	1	0	0	0	0	0	0	0	0	0	0	1	0	0	1	2
1785	0	71	2	5	3	2	1	1	99	1	2	99	99	99	99	99	99	99	99	99	99	2	1	2	2	2	99	99	1	208
1786	0	71	1	3	6	2	1	1	3	2	2	0	1	1	0	0	0	0	0	0	0	0	2	2	1	2	0	2	2	11
1787	0	71	1	3	1	1	1	1	2	2	2	0	1	0	0	0	0	0	0	0	0	0	0	0	0	0	0	0	1	1
1788	1	72	1	5	3	2	1	1	2	2	1	0	1	0	0	0	0	0	0	0	0	0	0	0	0	0	0	0	1	1
1789	1	72	1	3	2	1	1	1	3	2	3	0	1	0	0	0	0	0	0	0	0	1	0	1	0	0	1	0	1	4
1790	0	72	1	3	1	2	1	1	2	2	2	0	1	1	0	0	0	0	0	0	0	1	1	0	1	1	0	0	1	5
1791	1	72	1	3	1	1	1	1	2	2	1	0	1	0	0	0	0	0	0	0	0	0	1	1	1	1	0	0	1	5
1792	0	72	99	3	1	99	1	1	2	2	2	0	1	0	0	0	0	0	0	0	0	1	0	0	0	0	0	0	1	2
1793	0	72	2	3	3	2	1	2	1	1	2	0	0	0	0	0	0	0	0	1	0	2	2	2	2	1	1	3	1	14
1794	1	72	1	5	1	1	1	1	2	2	2	0	1	0	0	0	0	0	0	0	0	1	0	1	1	1	0	0	1	5
1795	1	72	1	3	2	2	2	1	2	1	2	0	1	0	0	0	0	1	0	0	0	0	0	1	0	1	0	0	1	3
1796	1	72	1	3	2	1	1	1	2	2	1	0	1	0	0	0	0	0	0	0	0	0	1	1	0	0	0	0	1	3
1797	1	72	1	3	1	1	1	1	2	2	2	0	0	0	0	0	0	0	0	0	1	0	1	2	1	1	0	0	1	6
1798	1	72	1	3	3	2	1	1	3	2	2	0	1	0	0	0	0	0	0	0	0	1	0	0	0	0	1	1	1	4
1799	1	72	1	3	1	1	1	1	2	2	2	0	1	0	0	0	0	0	0	0	0	0	0	0	0	0	0	0	1	1
1800	0	72	2	3	2	2	1	1	3	1	2	0	0	1	0	0	0	0	0	0	1	1	1	1	1	1	1	1	1	8
1801	0	72	1	3	1	1	1	1	2	2	2	0	0	1	0	0	0	0	0	0	0	0	0	1	0	0	0	0	1	2
1802	0	72	1	3	6	1	1	1	2	1	2	0	0	1	0	0	0	0	0	0	0	0	0	1	0	0	0	1	1	3
1803	1	72	1	3	1	1	2	1	2	1	2	0	1	1	0	0	0	0	0	0	0	0	2	1	1	1	0	0	1	6
1804	0	72	1	3	1	1	1	1	3	2	2	0	1	0	0	0	0	0	0	0	0	0	0	0	1	1	1	1	1	5
1805	0	72	1	3	1	2	1	1	2	2	2	0	0	1	0	0	0	0	0	0	0	1	0	99	1	0	0	0	1	102
1806	0	72	1	3	1	1	1	1	2	2	1	0	1	1	0	0	0	0	0	0	0	1	0	99	1	0	0	1	1	103
1807	0	72	2	3	1	1	1	1	2	1	2	0	0	1	0	0	0	0	0	0	1	1	0	1	1	1	1	1	1	7
1808	1	72	1	3	3	2	1	1	2	2	1	0	1	0	0	0	0	0	0	1	0	0	0	0	0	0	0	0	1	1
1809	1	72	1	3	2	2	1	1	2	2	2	0	1	0	0	0	0	0	0	0	0	0	0	0	0	0	0	0	1	1
1810	0	72	1	3	3	2	1	1	2	2	3	0	1	0	0	0	0	0	0	0	0	1	1	1	1	1	0	1	1	7
1811	1	72	1	3	1	2	1	1	2	2	2	0	1	0	0	0	0	0	0	0	0	1	0	2	1	2	0	1	1	8
1812	0	72	2	5	3	2	2	1	2	1	2	0	1	0	0	0	0	0	0	0	0	2	0	1	1	1	0	0	1	6
1813	0	72	1	3	1	1	1	1	3	2	2	0	1	0	0	0	0	0	0	0	0	1	99	1	1	1	1	1	1	106
1814	0	72	1	3	1	1	1	1	2	2	1	0	1	0	0	0	0	0	0	0	0	0	0	0	0	0	0	0	0	0
1815	1	72	1	3	1	1	2	1	2	2	2	0	1	0	0	0	0	0	1	0	0	1	2	2	2	1	1	3	2	14
1816	0	72	1	3	2	2	99	1	2	99	2	0	1	0	0	0	0	0	0	0	0	1	1	2	1	1	1	1	1	9
1817	0	72	2	1	3	2	1	1	3	1	1	0	1	0	0	0	0	0	0	0	0	0	0	0	0	0	0	0	0	0
1818	1	72	1	3	3	2	2	2	3	2	2	0	1	0	0	0	0	0	0	0	0	1	0	0	0	0	0	0	0	1
1819	1	72	1	5	3	2	1	1	3	2	1	0	0	0	0	0	0	0	0	1	0	2	1	2	1	1	1	1	1	10
1820	1	72	1	3	1	2	1	1	3	2	3	0	1	0	0	0	0	0	0	0	0	0	1	1	1	1	1	2	2	9
1821	1	72	1	3	1	2	2	2	2	2	1	0	1	0	0	0	0	0	0	0	0	0	2	2	1	1	0	0	1	7
1822	0	72	1	3	1	1	1	1	2	2	2	0	1	1	0	0	0	0	0	0	0	0	0	0	0	0	0	0	1	1
1823	0	72	1	3	3	3	2	2	3	2	2	0	1	0	0	0	1	1	0	0	0	0	0	0	0	0	0	0	1	1
1824	0	72	1	3	1	1	1	1	2	2	2	0	1	1	0	0	0	0	0	0	0	0	0	1	1	0	1	1	1	5
1825	0	72	1	3	1	1	1	1	2	1	2	0	1	0	0	0	0	0	0	0	0	0	0	1	1	0	1	2	1	6
1826	1	72	1	1	4	2	1	1	2	2	2	0	1	0	0	0	0	0	0	0	0	1	1	1	1	1	0	1	1	7
1827	0	72	1	1	4	2	1	1	2	2	2	0	1	0	0	0	0	0	0	0	0	2	1	1	1	2	1	1	1	10
1828	1	72	1	3	2	2	1	1	2	2	2	1	0	0	0	0	0	0	0	0	0	0	1	2	1	1	0	2	1	8
1829	0	72	1	3	1	2	1	2	2	2	2	1	0	0	0	0	0	0	0	0	0	1	0	1	1	1	1	1	1	7
1830	0	72	2	3	2	1	1	2	3	3	2	0	0	1	0	1	0	0	0	0	0	2	1	1	2	2	1	1	1	11
1831	0	72	1	5	1	2	1	2	2	2	1	0	1	1	0	0	0	0	0	0	0	1	0	1	1	1	0	0	1	5
1832	1	72	1	3	1	1	2	1	1	2	1	0	1	1	0	0	0	0	0	0	0	0	0	0	0	0	0	0	0	0
1833	0	72	1	3	1	1	1	1	2	2	1	0	1	0	0	0	0	0	0	0	0	0	0	0	0	0	0	0	0	0
1834	0	72	1	3	3	2	1	1	2	2	2	0	0	1	0	0	0	0	0	0	0	0	0	0	0	0	0	0	1	1
1835	0	72	1	3	1	1	1	1	3	2	2	0	0	1	0	0	0	0	0	0	0	0	0	99	1	1	0	0	1	102
1836	0	72	1	3	2	2	1	1	2	2	2	0	0	0	0	0	0	0	0	0	1	0	1	1	1	1	0	0	1	5
1837	1	72	1	3	3	2	1	1	2	2	2	0	1	1	1	0	0	0	0	1	0	0	0	0	0	0	0	0	0	0
1838	1	72	2	3	3	2	1	2	2	1	2	1	0	0	0	0	0	0	0	0	0	1	0	0	0	0	0	0	1	2
1839	1	72	2	3	2	99	2	2	2	1	3	0	0	0	0	0	0	0	1	1	0	1	1	1	0	1	1	1	1	7
1840	0	72	1	3	1	1	1	1	2	2	2	0	1	1	1	0	0	0	0	0	0	0	0	0	0	0	0	0	1	1
1841	0	72	2	3	3	2	1	1	2	1	2	0	1	0	0	0	0	0	0	0	0	0	0	0	1	1	1	1	1	5
1842	1	72	1	1	6	2	2	1	2	2	2	0	1	0	0	0	0	0	0	0	0	0	0	1	1	0	0	0	1	3
1843	0	72	1	3	2	1	1	1	2	2	99	0	1	1	0	0	0	0	0	0	0	1	0	0	0	1	0	0	1	3
1844	0	72	2	3	1	1	1	1	2	1	2	0	0	1	1	0	0	0	0	0	1	0	1	1	1	1	0	1	1	6
1845	0	72	1	3	1	1	1	1	2	2	1	0	1	1	0	0	0	0	0	0	0	1	0	1	1	0	0	0	0	3
1846	0	72	2	3	1	1	1	1	3	1	2	1	0	0	0	0	0	0	0	0	0	3	3	3	3	3	1	1	1	18
1847	0	72	1	3	1	1	1	1	2	1	2	0	1	1	0	0	0	0	0	0	0	1	0	0	0	1	0	0	1	3
1848	0	72	1	3	2	2	1	1	2	2	2	0	0	1	0	0	0	0	0	0	0	0	0	0	0	0	0	0	0	0
1849	0	72	1	3	1	1	1	1	2	2	2	0	1	1	0	0	0	1	0	0	0	3	2	1	2	2	3	2	1	16
1850	0	72	2	3	3	2	1	1	2	1	2	0	0	1	0	0	0	0	0	0	0	1	0	1	1	1	1	1	1	7
1851	0	72	2	3	1	2	1	1	2	1	3	0	0	0	0	0	0	0	0	0	1	0	0	0	1	0	0	0	0	1
1852	0	72	1	3	1	1	1	1	2	1	1	0	1	1	0	0	0	0	0	0	0	0	0	0	0	0	0	0	0	0
1853	0	72	2	3	3	2	1	1	3	1	1	0	0	0	0	0	0	0	0	0	1	0	0	0	0	1	0	0	1	2
1854	1	72	2	3	1	1	1	1	2	1	1	0	1	1	1	0	1	1	1	1	0	0	0	2	0	0	0	1	1	4
1855	1	72	2	1	4	1	1	1	2	1	1	0	0	1	0	1	0	0	0	0	0	1	0	1	1	1	0	1	1	6
1856	0	72	1	3	2	2	1	1	2	2	1	1	0	0	0	0	0	0	0	0	0	1	0	0	0	0	0	1	1	3
1857	1	72	1	3	1	1	1	1	3	2	2	0	1	0	0	0	0	0	0	0	0	1	1	2	0	1	0	1	2	8
1858	1	72	2	3	2	2	1	1	2	1	3	0	1	0	0	0	0	1	0	0	0	2	2	2	2	2	1	1	1	13
1859	1	72	2	3	3	2	2	2	2	1	1	0	0	1	0	0	0	0	0	0	0	0	0	0	0	0	0	0	1	1
1860	1	72	1	3	1	1	1	1	2	2	2	0	0	1	0	0	0	0	0	0	0	2	1	2	1	1	0	0	1	8
1861	1	72	1	3	3	2	1	1	2	2	2	0	1	0	0	0	0	0	0	0	0	0	0	0	0	0	0	0	1	1
1862	0	72	1	3	1	1	1	1	2	2	2	0	1	1	0	0	0	0	0	0	0	99	0	0	0	1	0	0	1	101
1863	1	72	1	3	1	1	1	1	2	2	2	0	1	1	0	0	0	0	0	0	0	1	1	2	1	1	0	0	1	7
1864	1	72	1	3	1	2	2	1	2	2	2	0	1	0	0	0	0	1	0	0	0	0	0	0	0	0	0	0	0	0
1865	0	72	1	3	1	1	1	1	2	2	1	0	1	0	0	0	0	0	0	0	0	0	1	0	1	1	0	0	1	4
1866	0	72	1	3	1	1	1	1	2	99	2	0	1	0	0	0	0	0	0	0	1	0	0	0	0	0	0	0	0	0
1867	0	72	1	3	1	1	1	1	2	2	2	0	1	1	0	0	0	0	0	0	0	0	0	0	0	0	0	0	0	0
1868	1	72	1	3	2	1	1	1	2	2	3	0	1	0	0	0	0	0	0	0	0	1	0	1	1	1	1	0	1	6
1869	1	72	1	3	6	1	1	1	2	2	1	0	1	0	0	0	0	0	0	0	0	0	1	1	1	1	0	0	1	5
1870	0	72	1	3	1	1	1	1	2	2	2	0	1	0	0	0	0	0	0	0	0	0	0	0	0	1	0	1	1	3
1871	1	72	2	3	1	2	1	1	2	1	2	1	0	0	0	0	0	0	0	0	0	1	1	0	1	1	0	2	1	7
1872	0	72	1	3	1	2	1	1	2	2	2	0	1	1	0	0	0	0	0	0	0	1	1	1	1	1	1	1	1	8
1873	0	72	2	3	3	2	1	1	3	1	1	1	0	0	0	0	0	0	0	0	0	1	2	1	0	1	2	1	2	10
1874	1	72	1	3	1	1	1	1	2	2	2	0	1	0	0	0	0	0	0	0	0	0	0	1	0	0	0	0	1	2
1875	1	72	1	3	2	2	2	1	2	2	2	0	1	0	0	0	0	0	0	0	0	1	0	0	0	0	0	0	1	2
1876	0	72	2	3	3	2	1	1	2	1	3	0	0	1	0	0	0	0	0	0	0	0	0	1	0	1	0	1	1	4
1877	1	72	1	3	1	1	1	2	2	2	2	0	1	0	0	0	0	0	0	0	0	0	0	0	0	0	0	0	1	1
1878	1	72	1	3	1	1	1	1	2	2	1	0	1	0	0	1	0	0	0	0	0	1	1	1	1	1	1	0	1	7
1879	1	72	1	3	1	1	1	1	2	1	1	0	1	0	0	0	0	0	0	0	0	0	0	1	0	0	0	0	0	1
1880	1	72	1	3	1	1	1	1	2	2	2	0	1	0	0	0	0	0	0	0	0	0	0	1	1	1	0	1	1	5
1881	0	72	2	3	2	1	1	1	2	1	1	0	1	1	1	0	0	0	0	0	0	0	0	0	0	0	0	0	1	1
1882	0	72	1	3	2	1	1	1	3	2	3	0	1	0	0	0	0	0	0	0	0	1	0	1	1	1	1	1	1	7
1883	0	72	2	1	1	1	1	1	2	1	1	0	1	1	1	0	0	0	0	0	0	0	0	0	0	0	0	0	1	1
1884	0	72	1	3	2	2	1	1	2	2	2	0	1	0	0	0	0	0	0	0	0	0	0	0	1	1	0	0	1	3
1885	1	72	2	3	5	2	1	1	2	3	1	0	1	0	0	0	0	0	0	0	0	0	0	0	0	0	0	0	0	0
1886	0	72	2	5	3	1	2	2	3	1	2	1	0	0	0	0	0	0	0	0	0	3	1	2	2	2	2	2	2	16
1887	1	72	1	3	2	2	2	2	3	2	2	0	0	0	0	0	0	0	0	0	1	1	0	0	0	0	0	0	1	2
1888	0	72	1	3	1	2	1	1	2	2	2	0	1	1	0	0	0	0	0	0	0	0	0	0	0	0	0	0	1	1
1889	0	72	1	3	1	1	1	1	2	2	2	0	1	1	0	0	0	0	0	0	0	1	1	2	1	1	0	1	0	7
1890	1	72	2	3	2	1	1	2	2	1	3	0	0	1	0	0	0	0	0	0	0	0	0	1	1	1	0	0	1	4
1891	0	72	1	3	1	1	1	1	2	2	2	0	0	1	0	0	0	0	0	0	0	1	0	1	1	1	0	0	1	5
1892	1	72	1	3	1	1	1	1	2	2	2	0	1	0	0	0	0	0	0	0	0	0	0	1	1	0	0	0	1	3
1893	1	72	2	3	2	3	1	2	2	1	2	0	0	0	0	0	0	1	1	0	0	1	0	1	0	1	0	0	1	4
1894	1	72	1	3	1	1	2	1	2	1	2	0	1	0	0	0	0	0	0	0	0	3	2	3	2	2	1	2	1	16
1895	0	72	1	3	1	1	1	1	2	2	2	0	1	0	0	0	0	0	0	0	0	1	0	1	0	0	1	0	0	3
1896	0	72	2	3	3	1	1	1	1	1	3	1	0	0	0	0	0	0	0	0	0	99	1	2	2	1	1	1	0	107
1897	1	72	2	3	3	3	2	2	2	1	2	0	1	0	0	0	0	0	0	0	0	1	0	0	1	1	0	0	0	3
1898	1	72	1	3	1	1	1	1	2	2	2	0	1	0	0	0	0	0	0	0	0	0	0	0	1	1	0	1	1	4
1899	1	72	1	3	1	1	1	1	2	2	1	0	1	1	0	0	0	0	0	0	0	0	0	1	0	0	0	0	1	2
1900	1	72	1	1	1	1	1	1	2	2	1	0	0	1	1	0	0	0	0	0	0	0	0	0	0	0	0	0	0	0
1901	1	72	1	3	2	1	2	1	2	2	1	0	1	0	0	0	0	0	0	0	0	0	0	0	0	0	0	1	1	2
1902	1	72	1	3	2	2	2	1	2	2	2	0	1	0	0	0	0	0	0	0	0	0	0	0	0	0	0	0	0	0
1903	1	72	1	1	1	1	2	1	2	2	2	0	1	1	0	0	0	0	1	0	0	0	0	0	0	0	0	0	1	1
1904	1	72	1	3	2	2	1	1	2	2	1	0	1	0	0	0	0	0	0	0	0	0	1	0	0	1	0	0	1	3
1905	1	72	1	3	1	1	1	1	2	2	1	0	1	0	0	0	0	0	0	0	0	1	0	0	0	0	0	0	0	1
1906	0	72	1	3	1	1	1	1	2	2	1	0	1	1	0	0	0	0	0	0	0	0	0	0	0	0	0	0	1	1
1907	1	72	1	3	1	1	1	1	3	1	1	0	1	0	0	0	0	0	0	0	0	1	0	0	0	0	0	1	0	2
1908	1	72	1	3	1	1	1	1	2	2	2	0	0	1	0	0	0	0	0	0	0	1	1	1	1	1	1	1	1	8
1909	1	72	1	3	1	1	2	1	2	2	2	0	1	0	0	0	0	0	0	0	0	0	0	0	0	0	0	0	1	1
1910	0	72	1	1	1	1	2	1	2	2	2	0	1	1	0	0	0	1	0	0	0	0	0	0	0	0	0	0	0	0
1911	1	72	1	3	1	1	1	1	2	2	3	0	1	0	0	0	0	0	0	0	0	0	0	0	0	0	0	0	1	1
1912	1	72	2	3	2	2	1	1	2	1	2	0	0	1	0	0	0	0	0	0	0	0	1	1	0	0	0	1	1	4
1913	1	72	1	3	3	2	99	2	2	99	1	0	1	0	0	0	0	0	0	0	0	0	0	2	0	1	0	0	1	4
1914	1	72	1	3	1	1	1	1	2	2	2	0	0	0	0	0	0	0	0	0	1	0	0	0	0	0	0	0	1	1
1915	0	72	1	3	1	1	1	1	2	2	1	0	1	1	0	0	0	0	0	0	0	1	2	1	1	1	1	0	1	8
1916	0	72	1	3	1	1	1	1	2	2	1	0	1	0	0	0	0	0	0	0	0	0	0	0	0	0	0	0	1	1
1917	1	72	1	3	1	1	1	1	2	2	1	0	1	1	0	0	0	0	0	0	0	1	1	1	1	1	0	0	1	6
1918	1	72	1	3	1	1	1	1	2	2	2	0	1	0	0	0	0	0	0	0	0	0	0	0	0	0	0	0	1	1
1919	1	72	1	3	1	1	2	1	2	2	1	0	1	0	0	0	0	0	0	0	0	0	1	1	0	1	1	1	0	5
1920	1	72	2	3	3	2	1	1	2	1	2	1	0	0	0	0	0	0	0	0	0	1	0	2	1	1	0	2	1	8
1921	0	72	1	3	1	1	1	1	2	2	2	0	1	1	0	0	0	0	0	0	0	0	0	0	0	0	0	0	0	0
1922	1	72	1	3	1	1	2	1	2	2	1	0	1	1	1	1	0	1	0	0	0	1	2	1	2	2	0	0	0	8
1923	0	72	1	5	1	1	1	1	2	2	2	0	1	1	0	0	0	0	0	0	0	0	0	0	0	0	0	0	1	1
1924	1	72	1	3	1	1	1	1	3	2	2	0	1	0	0	0	0	0	0	0	0	1	0	1	0	0	1	2	2	7
1925	0	72	1	3	1	1	2	1	1	2	2	0	0	1	0	0	0	0	0	0	0	1	0	1	1	0	0	0	0	3
1926	0	72	2	3	2	1	2	2	3	1	2	0	0	1	0	0	0	0	0	0	0	1	1	2	0	1	2	2	1	10
1927	0	72	1	3	1	1	1	1	2	2	99	0	1	1	0	0	0	1	0	1	0	0	99	99	0	0	0	0	1	199
1928	0	72	1	3	6	1	1	1	2	3	2	0	1	1	0	0	0	0	0	0	0	99	0	2	1	1	0	1	1	105
1929	1	72	2	3	3	3	1	2	3	1	1	1	0	0	0	0	0	0	0	0	0	1	0	1	1	0	0	0	1	4
1930	0	72	2	3	1	1	1	1	1	1	1	0	1	0	0	0	0	0	0	0	0	1	1	1	1	1	1	1	1	8
1931	0	72	2	3	3	2	2	2	3	1	99	99	99	99	99	99	99	99	99	99	99	2	1	1	1	2	99	99	99	304
1932	1	72	1	3	1	1	2	1	2	2	3	0	1	0	0	0	0	0	0	0	0	0	1	0	0	1	0	0	0	2
1933	1	72	1	3	1	1	2	2	2	1	2	0	1	0	0	0	0	0	0	0	0	2	0	1	0	0	0	0	0	3
1934	0	72	2	3	1	1	1	1	2	2	2	0	1	1	0	0	0	0	0	0	0	99	0	0	1	1	1	1	2	105
1935	1	72	1	3	1	1	1	1	2	2	1	0	1	0	0	0	0	0	0	0	0	0	0	0	1	0	1	1	1	4
1936	1	72	1	3	1	1	2	2	2	2	1	0	0	1	0	0	0	1	0	0	0	1	0	1	0	1	0	0	1	4
1937	1	72	1	3	1	1	2	1	2	2	2	1	0	0	0	0	0	0	0	0	0	0	0	0	0	0	0	0	1	1
1938	0	72	2	3	3	3	1	1	2	1	3	0	1	1	0	0	0	0	0	0	0	0	0	99	99	99	0	1	1	299
1939	0	72	99	3	99	99	1	99	99	1	99	99	99	99	99	99	99	99	99	99	99	99	99	99	99	99	99	99	99	792
1940	1	72	1	3	1	1	1	1	2	2	2	0	1	0	0	0	0	0	0	0	0	1	0	1	0	0	0	0	1	3
1941	1	72	1	3	1	1	1	1	2	2	1	0	1	0	0	0	0	0	0	0	0	0	0	1	0	0	0	0	2	3
1942	0	72	1	3	1	2	1	1	2	2	2	0	1	0	0	0	0	0	0	0	0	1	1	1	0	1	0	0	1	5
1943	1	72	1	5	3	2	1	1	1	2	2	0	1	0	0	0	0	1	0	0	0	0	2	0	1	1	0	2	1	7
1944	1	72	1	3	1	1	2	1	2	2	1	0	1	0	0	0	0	0	0	0	0	0	0	1	0	0	0	0	1	2
1945	1	72	1	3	1	1	1	1	2	2	2	0	1	0	0	0	0	0	0	0	0	0	0	0	0	0	0	0	0	0
1946	1	72	1	3	3	2	1	1	3	2	2	0	0	0	0	0	0	1	0	0	0	0	0	1	0	1	2	2	2	8
1947	1	72	1	5	3	2	2	1	2	2	1	0	1	0	0	0	0	0	0	0	0	0	0	0	0	0	0	0	1	1
1948	1	72	1	3	3	2	1	1	2	2	1	0	1	1	0	0	0	0	0	0	0	0	0	0	0	0	0	0	0	0
1949	0	72	1	3	2	2	1	1	2	2	2	0	1	1	0	0	0	0	0	0	0	1	2	0	1	2	0	0	0	6
1950	1	72	1	3	1	1	1	1	2	2	2	0	1	1	0	0	0	0	0	0	0	1	1	1	1	1	0	1	1	7
1951	1	72	1	3	1	2	2	1	3	2	1	0	0	0	0	0	0	0	0	0	1	0	0	0	0	1	0	1	1	3
1952	0	72	1	3	1	1	1	1	2	2	2	0	1	1	0	0	0	0	0	0	0	1	1	1	0	1	0	2	1	7
1953	1	72	1	3	1	1	1	1	2	2	1	0	1	0	0	0	0	0	0	0	0	0	0	1	0	0	0	0	1	2
1954	0	72	1	3	1	1	1	1	2	2	1	0	1	1	0	0	0	0	0	0	0	1	1	2	3	1	1	1	1	11
1955	0	72	1	5	1	1	99	1	2	99	2	0	1	1	0	0	0	0	0	0	0	0	0	0	0	0	0	0	1	1
1956	1	72	1	3	1	1	1	1	2	2	2	0	1	0	0	0	0	0	0	0	0	0	0	0	0	0	0	3	1	4
1957	1	72	1	5	3	1	2	1	2	2	2	0	1	0	0	0	0	0	0	0	0	1	0	1	0	0	0	0	0	2
1958	0	72	2	3	2	1	1	1	2	1	2	0	0	1	0	0	0	0	0	0	1	1	0	99	0	0	0	0	1	101
1959	0	72	1	3	2	1	1	1	3	2	2	0	1	0	0	0	0	0	0	0	0	0	0	99	0	0	0	0	0	99
1960	1	72	2	3	1	1	1	1	2	2	1	0	1	1	0	0	0	0	0	0	0	0	99	1	0	0	0	0	1	101
1961	1	72	2	3	3	2	1	1	2	1	1	1	0	0	0	0	0	0	0	0	0	1	0	1	1	1	1	1	1	7
1962	1	72	1	3	2	2	1	1	2	2	3	0	1	0	0	0	0	0	0	0	0	0	0	0	0	0	0	0	0	0
1963	1	72	1	3	1	1	1	1	2	2	1	0	1	1	1	0	0	1	0	0	0	0	0	0	0	0	0	1	1	2
1964	1	72	1	3	2	2	2	2	2	2	3	0	1	0	0	0	0	0	0	0	0	0	0	0	1	0	0	0	1	2
1965	0	72	1	3	3	2	1	1	2	1	1	0	0	0	0	0	0	0	0	1	0	2	1	2	2	2	1	2	1	13
1966	0	72	1	3	1	1	1	1	2	2	1	0	1	0	0	0	0	0	0	0	0	0	0	0	0	0	0	0	0	0
1967	0	72	1	3	1	1	1	1	2	2	2	0	1	1	0	0	0	0	0	0	0	1	1	0	0	1	0	1	1	5
1968	0	72	1	3	1	1	1	2	3	2	3	0	1	1	0	0	0	0	0	0	0	1	0	1	0	0	1	1	1	5
1969	0	72	1	3	1	1	1	1	2	2	2	0	1	1	0	0	0	0	0	0	0	0	1	1	0	1	0	1	0	4
1970	0	72	1	3	1	1	1	1	2	2	2	0	1	1	1	0	0	0	0	0	0	0	1	0	0	0	0	0	1	2
1971	0	72	1	5	3	2	1	2	3	2	2	0	1	0	0	0	0	0	0	0	0	1	1	1	1	1	0	0	1	6
1972	1	72	1	3	1	1	2	1	2	2	2	0	1	0	0	0	0	1	0	0	0	1	1	1	1	1	0	1	1	7
1973	0	72	1	3	1	1	1	1	3	2	1	0	0	1	1	0	0	0	0	0	0	0	0	1	0	0	0	1	1	3
1974	0	72	2	3	3	2	2	1	1	1	1	0	0	1	1	0	0	0	0	0	0	0	1	1	0	0	1	1	1	5
1975	1	72	1	3	1	1	1	1	2	2	1	0	1	1	0	0	0	1	0	0	0	0	1	1	1	1	0	0	1	5
1976	0	72	1	3	1	1	1	1	2	2	2	0	1	1	1	0	0	0	0	0	0	0	0	0	0	0	0	1	1	2
1977	0	72	1	3	1	1	2	1	3	2	2	0	1	1	0	0	0	0	0	0	0	1	1	1	1	1	0	0	1	6
1978	1	72	2	3	2	2	2	2	3	1	3	0	0	1	0	0	0	0	0	0	0	1	1	1	2	2	1	2	1	11
1979	1	72	1	3	1	1	1	1	2	2	1	0	1	0	0	0	0	0	0	0	0	0	0	0	0	0	0	0	1	1
1980	1	72	1	3	1	1	1	1	2	2	2	0	1	0	0	0	0	1	0	0	0	0	0	0	0	0	0	0	1	1
1981	1	72	1	3	1	1	1	1	2	2	1	0	1	0	1	0	0	0	0	0	0	1	1	2	0	1	0	0	1	6
1982	0	72	1	3	1	1	1	1	2	2	1	0	1	1	1	0	0	0	0	0	0	1	1	1	1	1	0	0	1	6
1983	1	72	1	3	1	1	1	1	2	2	2	0	1	0	0	0	0	0	0	0	0	0	0	0	0	0	0	0	0	0
1984	1	72	1	3	2	2	1	1	2	2	2	0	1	0	0	0	0	0	0	0	0	0	0	0	0	0	0	0	0	0
1985	1	72	99	3	1	2	2	2	2	1	2	1	0	0	0	0	0	0	0	0	0	1	0	0	1	0	0	99	0	101
1986	0	72	1	3	3	2	1	1	3	2	2	0	1	1	0	0	0	0	1	0	0	0	1	0	1	1	1	1	1	6
1987	0	72	1	5	1	1	1	1	2	2	1	0	1	1	0	0	0	0	0	0	0	0	0	0	1	0	0	0	1	2
1988	1	72	1	3	1	1	1	1	1	2	3	0	1	0	0	0	0	0	0	0	0	0	0	0	0	0	0	0	1	1
1989	0	72	1	5	1	1	1	1	3	2	2	0	1	0	0	0	0	0	0	0	0	1	0	2	1	1	0	1	1	7
1990	0	72	2	3	2	3	1	2	3	1	2	0	0	1	0	0	0	0	0	0	0	2	1	2	2	1	1	2	2	13
1991	0	72	1	3	1	1	1	1	2	2	2	0	1	1	1	0	0	0	0	0	0	0	0	0	1	0	0	0	1	2
1992	1	72	1	3	2	2	2	1	2	2	3	0	1	0	0	0	0	0	0	0	0	1	1	0	0	0	0	0	1	3
1993	1	72	2	5	3	2	2	1	2	1	2	0	1	0	0	0	0	0	1	1	0	1	1	1	0	0	1	2	1	7
1994	0	72	1	3	2	1	1	2	2	2	3	0	1	0	0	0	0	0	0	0	0	0	0	0	0	0	0	0	0	0
1995	0	72	1	3	1	1	1	1	2	2	1	0	1	1	0	0	0	0	0	0	0	0	0	0	0	1	0	0	1	2
1996	1	72	2	3	2	2	2	2	2	1	3	1	0	0	0	0	0	0	0	0	0	2	2	2	2	2	1	1	1	13
1997	1	72	1	3	3	2	2	1	2	2	2	0	1	1	0	0	0	0	0	0	0	0	0	0	0	0	0	0	1	1
1998	0	72	1	3	2	1	1	1	2	2	2	0	1	0	0	0	0	0	1	0	0	2	1	1	1	2	1	1	2	11
1999	1	72	1	3	1	1	1	1	1	2	2	0	1	0	0	0	0	0	0	0	0	2	1	2	1	2	0	1	2	11
[truncated: 2,759 more rows]
