# Supplementary material for: Examination of factors affecting insomnia in older victims of the Kumamoto earthquake
Source: PeerJ. 2026 Jan 13;14:e20584. doi: 10.7717/peerj.20584 (PMC12810385; doi:10.7717/peerj.20584)
Supplement: Supplemental Information 2 [file peerj-14-20584-s002.xlsx]

## Sheet: code
	Categorical data codes
	Category	code
	Gender
	Male	1
	Female	0
	Cohabitant
	Yes	1
	No	2
	Temporary housing category
	Prefabricated temporary housing	1
	Temporary housing in the private sectors	3
	Temporary housing in the public sectors	5
	Current residence
	Owned house	1
	Houses for rent	2
	Public housing	3
	Public housing for disaster	4
	Hospitals and institutions	5
	Other	6
	Scope of relocation
	Within the community	1
	Outside the community	2
	Exercise habits
	Yes	1
	No	2
	Eat three meals a day
	Yes	1
	No	2
	Appetite
	Increase	1
	Unchanged	2
	Decrease	3
	Meal partner
	Alone	1
	Family	2
	Friend	3
	Community participation
	Yes	1
	None	2
	No information	3
	Social support (Anyone)
	Yes	0
	None	1
	Social support (Family)
	Yes	1
	None	0
	Social support (Friend)
	Yes	1
	None	0
	Social support (Neighbors)
	Yes	1
	None	0
	Social support (Coworker)
	Yes	1
	None	0
	Social support (District welfare commissioners)
	Yes	1
	None	0
	Social support (Hospital)
	Yes	1
	None	0
	Social support (Nursing care office)
	Yes	1
	None	0
	Social support (City office)
	Yes	1
	None	0
	Social support (Other)
	Yes	1
	None	0
	AIS-1 (Sleep induction )
	No problem	0
	Slightly delayed	1
	Markedly delayed	2
	Very delayed or did not sleep all	3
	AIS-2 (Awakenings during the night)
	No problem	0
	Minor problem	1
	Considerable problem	2
	Serious problem or did not sleep all	3
	AIS-3 (Final awakening earlier than desired)
	Not earlier	0
	A little earlier	1
	Markedly earlier	2
	Much earlier or did not sleep at all	3
	AIS-4 (Total sleep duration)
	Sufficient	0
	Slightly insufficient	1
	Markedly insufficient	2
	Very insufficient or did not sleep at all	3
	AIS-5 (Very insufficient or did not sleep at all)
	Satisfactory	0
	Slightly unsatisfactory	1
	Markedly unsatisfactory	2
	Very unsatisfactory or did not sleep at all	3
	AIS-6 (Sence of well-being during the day)
	Normal	0
	Slightly decreased	1
	Markedly decreased	2
	Very decreased	3
	AIS-7 (Functioning during the day)
	Normal	0
	Slightly decreased	1
	Markedly decreased	2
	Very decreased	3
	AIS-8 (Sleepiness during the day)
	None	0
	Mild	1
	Considerable	2
	Intense	3
	99:No answer
